# Supplementary material for: Symmetric neural progenitor divisions require chromatin-mediated homologous recombination DNA repair by Ino80
Source: PubMed Central journal article supplement (PMC7395731; doi:10.1038/s41467-020-17551-4), 2020-07-31
Supplement: 41467_2020_17551_MOESM1_ESM.pdf [file 41467_2020_17551_MOESM1_ESM.pdf]

## Supplementary Information

### Symmetric neural progenitor divisions require chromatin-mediated homologous recombination DNA repair by *Ino80*

Jason M. Keil<sup>1,2,3</sup>, Daniel Z. Doyle<sup>1,2,4</sup>, Adel Qalieh<sup>1,2</sup>, Mandy M. Lam<sup>1,2</sup>, Owen H. Funk<sup>1,2</sup>, Yaman Qalieh<sup>1,2</sup>, Lei Shi<sup>1,2</sup>, Nitesh Mohan<sup>1,2</sup>, Alice Sorel<sup>1,2</sup>, Kenneth Y. Kwan<sup>1,2,4,\*</sup>

1. Michigan Neuroscience Institute (MNI), University of Michigan, Ann Arbor, MI 48109, USA.
2. Department of Human Genetics, University of Michigan, Ann Arbor, MI 48109, USA.
3. Medical Scientist Training Program, University of Michigan, Ann Arbor, MI 48109, USA.
4. Neuroscience Graduate Program, University of Michigan, Ann Arbor, MI 48109, USA.

\*Correspondence should be addressed to K.Y.K. (kykwan@umich.edu)

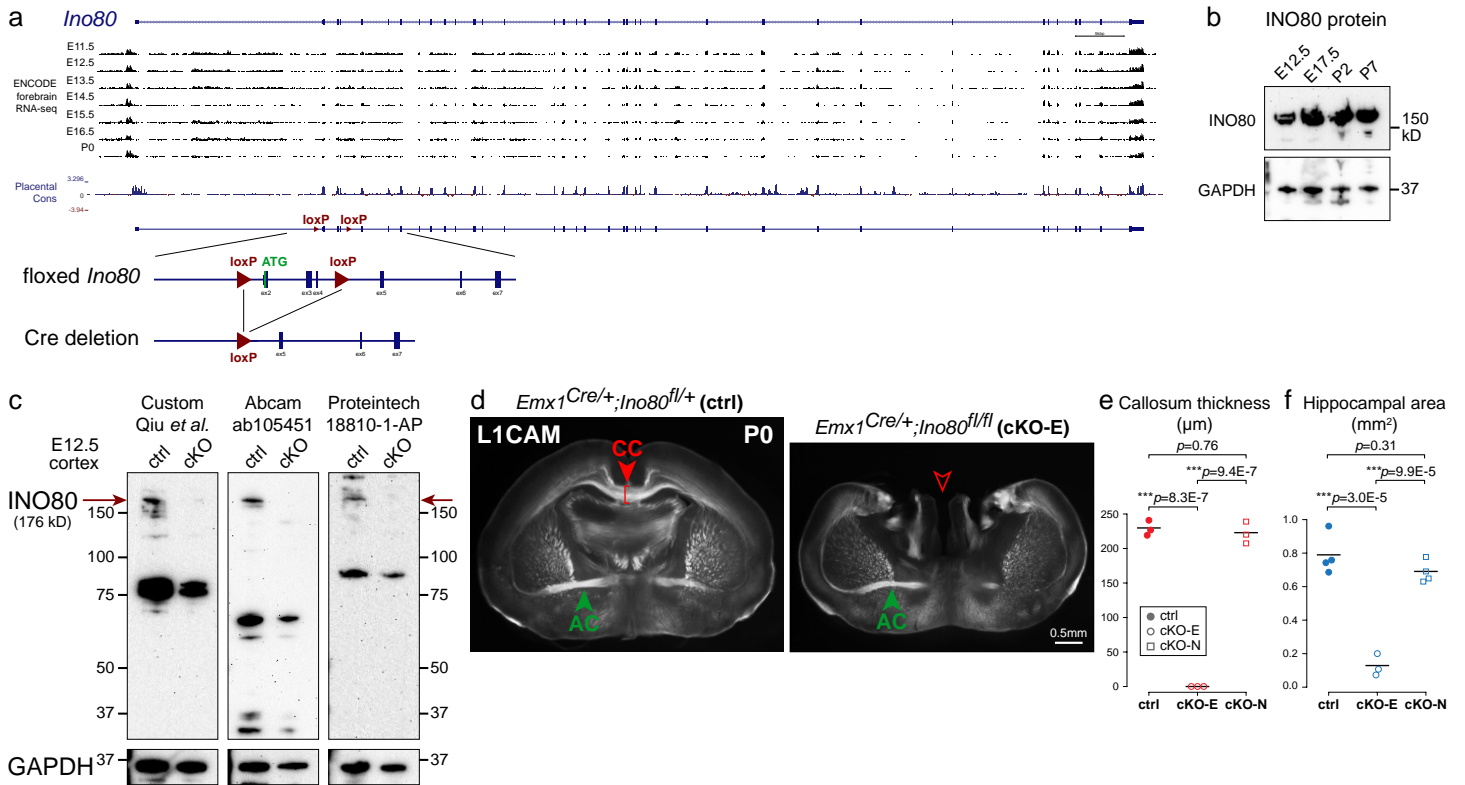

## Supplementary Figure 1

**a**, The mouse *Ino80* locus and the conditional *Ino80* allele. ENCODE RNA-seq data show *Ino80* expression in forebrain from E11.5 to P0. Additional ENCODE RNA-seq data for *Ino80* mRNA expression can be found at <https://www.ncbi.nlm.nih.gov/gene/68142/?report=expression>. For the conditional *Ino80* allele, the loxP sites (red triangles) flanking exons 2-4 and deletion upon Cre-mediated excision are illustrated. Cons., conservation

**b**, INO80 immunoblotting of wildtype E12.5, E17.5, P2, and P7 cortical lysate revealed INO80 protein expression throughout cortical developmental ages.

**c**, INO80 immunoblotting with three anti-INO80 antibodies revealed loss of INO80 protein (~176kD) expression from E12.5 *Ino80* cKO-E cortex.

**d**, L1CAM immunostaining (white) of coronal P0 sections. In cKO-E, the corpus callosum (CC, red arrowhead) was absent. The anterior commissure (AC, green arrowhead) was formed.

**e** and **f**, Quantitative analyses of coronal P0 sections revealed significant reductions in corpus callosum thickness (n=3 animals) and hippocampal area (ctrl: n=4, cKO-E: n=3, cKO-N: n=4 animals), in cKO-E, but not cKO-N, compared to ctrl (Data are mean, one-way ANOVA with Tukey's post-hoc test).

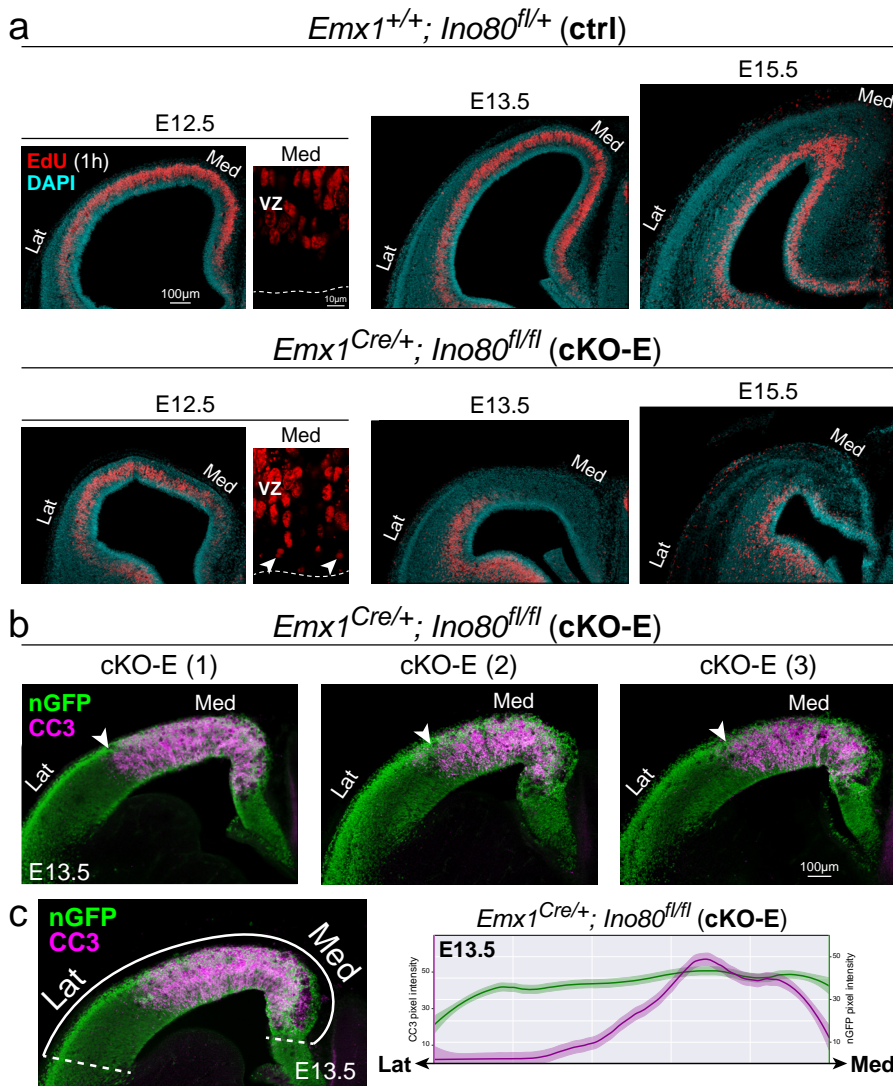

## Supplementary Figure 2

**a**, S-phase NPCs in E12.5, E13.5, and E15.5 brains were labeled by a 1-hour pulse of EdU (red) and coronal sections were stained with DAPI (cyan). From E12.5 to E15.5, the medial (Med) cKO-E cortex was characterized by a progressive loss of EdU+ cycling NPCs. Some EdU+ nuclei in medial cKO-E cortex were pyknotic (arrowheads), suggesting that apoptosis occurred during or within 1 hour of S-phase. In lateral (Lat) cKO-E cortex, EdU+ NPCs were present at E12.5, E13.5, and E15.5, indicating that NPCs continued to proliferate in lateral cortex.

**b**, Cleaved Caspase 3 (CC3) immunostaining (magenta) of coronal E13.5 sections from three cKO-E brains showed consistent apoptosis in medial, but not lateral, neocortex. The lateral extent of apoptosis (arrowhead) was consistent in all analyzed cKO-E brains. Cre-dependent expression of nGFP (green) from *ROSA<sup>nT-nG</sup>* was consistently present in both medial and lateral cKO-E neocortex.

**c**, Analysis of immunofluorescent pixel intensity from lateral (Lat) to medial (Med) E13.5 cortex revealed Cre-dependent expression of nGFP (green) throughout the mediolateral extent of E13.5 cKO-E neocortex. Apoptosis (CC3, magenta), however, was present only in medial cKO-E cortex (Data are LOESS curve  $\pm$  99% confidence interval,  $n=3$  animals).

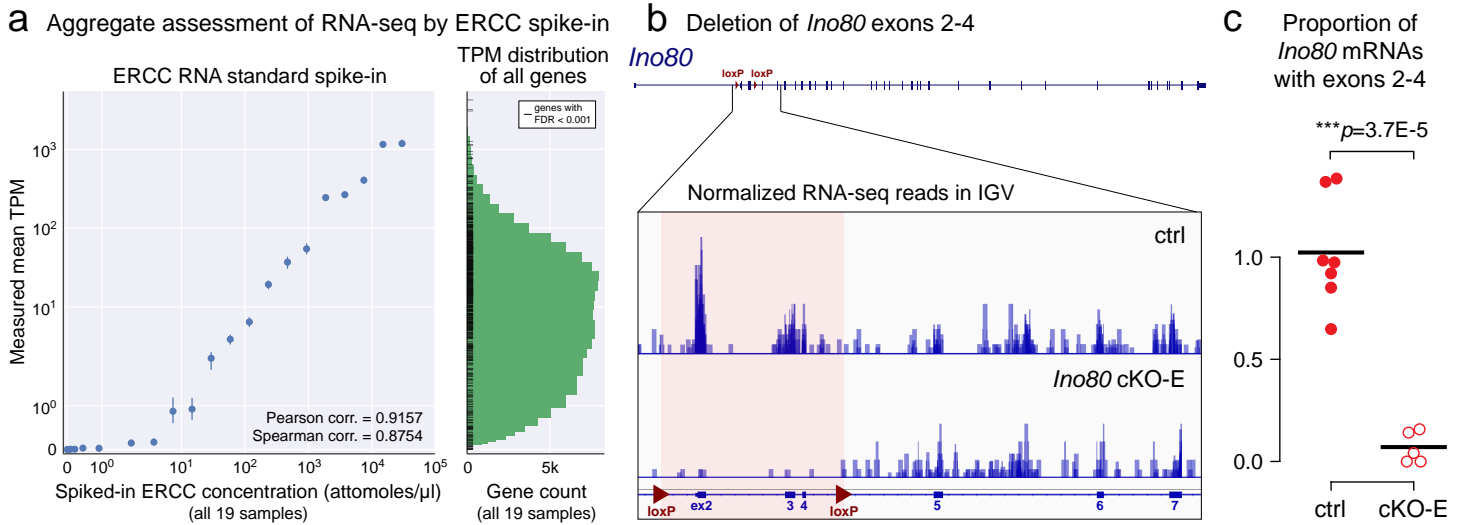

### Supplementary Figure 3

**a**, Aggregate assessment of ERCC spike-in standards in UMI RNA-seq revealed excellent quantification over a broad range of expression values. The vast majority of genes from all 19 experimental samples were within the dynamic range of UMI RNA-seq. TPM, transcripts per million

**b**, Normalized UMI RNA-seq reads that mapped to *Ino80* exons 2-7 were visualized using Integrative Genomics Viewer (IGV). Loss of RNA-seq reads from exons 2-4 in cKO-E confirmed Cre-mediated deletion of these exons at the level of the transcriptome.

**c**, The proportion of *Ino80* mRNAs with intact (unrecombined) exons 2-4 based on RNA-seq RPKM in *Ino80* cKO-E and ctrl E13.5 cortex (Data are mean, two-tailed unpaired *t*-test, ctrl: n=7, cKO-E: n=5 animals).

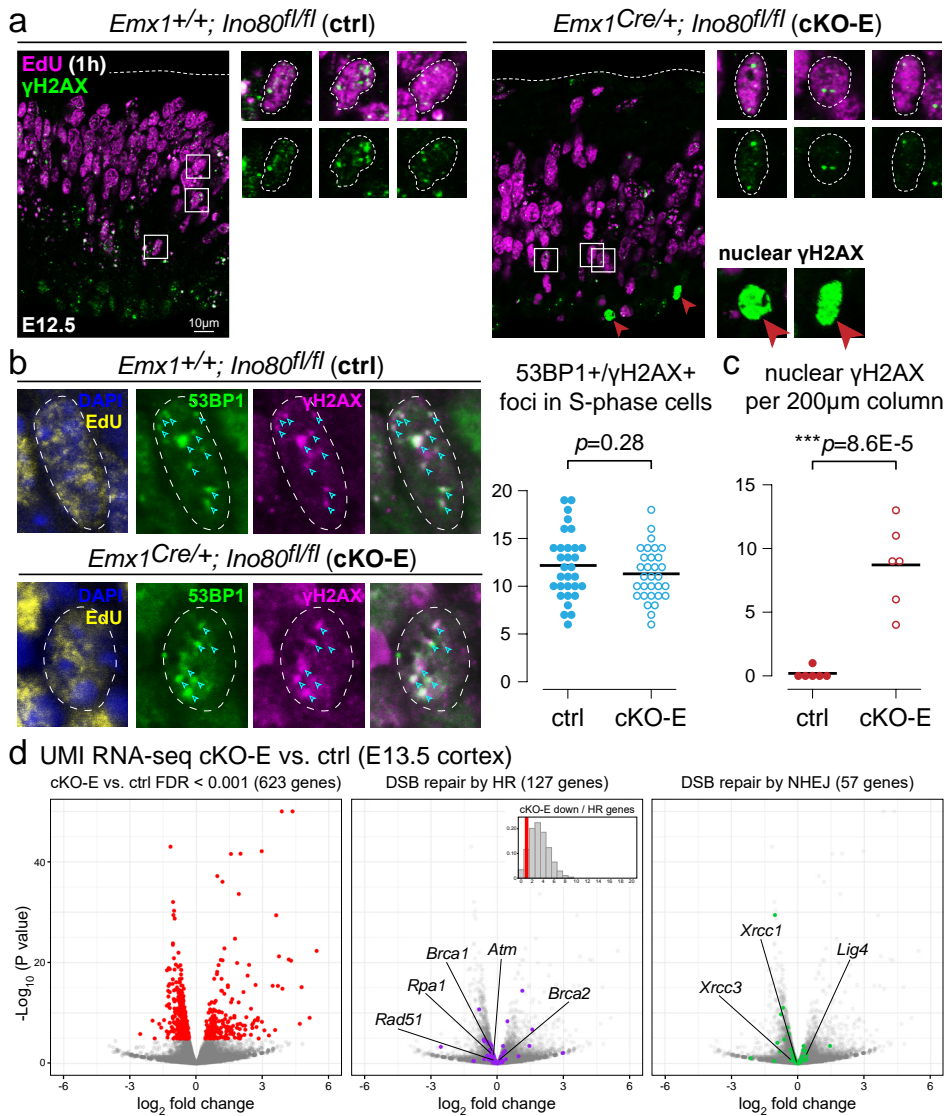

## Supplementary Figure 4

**a**, S-phase NPCs in E12.5 brains were labeled by a 1-hour pulse of EdU (magenta) and coronal sections were immunostained for  $\gamma$ H2AX (green). In ctrl, numerous  $\gamma$ H2AX foci were present in S-phase NPCs (insets), consistent with physiological DSBs during normal DNA replication. In cKO-E,  $\gamma$ H2AX foci were also present in S-phase NPCs. However, in addition to replication-associated DSBs, some cKO-E NPCs near the ventricular surface were characterized by pan-nuclear  $\gamma$ H2AX staining (arrowheads), a marker of apoptosis following substantial DNA damage during replication.

**b**, S-phase DSBs were quantified by co-immunostaining for  $\gamma$ H2AX (magenta) and the DNA repair protein 53BP1 (green), which colocalize at sites of DSBs. The number of  $\gamma$ H2AX+/53BP1+ foci (arrowheads) in S-phase NPCs (1h EdU+, yellow) was not significantly different in E12.5 *Ino80* cKO-E cortex compared to ctrl (Data are mean, two-tailed unpaired *t*-test,  $n=31$  EdU+ cells from 3 animals).

**c**, Quantification of pan-nuclear  $\gamma$ H2AX staining, a marker of apoptosis following substantial DNA damage during replication, in EdU- ventricular NPCs (arrowheads in **a**) revealed a significant increase in E12.5 cKO-E cortex compared to ctrl (Data are mean, two-tailed unpaired *t*-test,  $n=6$  hemispheres from 3 animals).

**d**, Expression of DNA damage repair genes in *Ino80* cKO-E. As a group, DNA damage repair genes were not significantly downregulated in cKO-E. HR genes *Brca1*, *Brca2*, *Rpa*, *Atm*, and *Rad51* were not downregulated. Only 1 of 127 genes involved in homology-dependent DNA repair was downregulated in cKO-E.

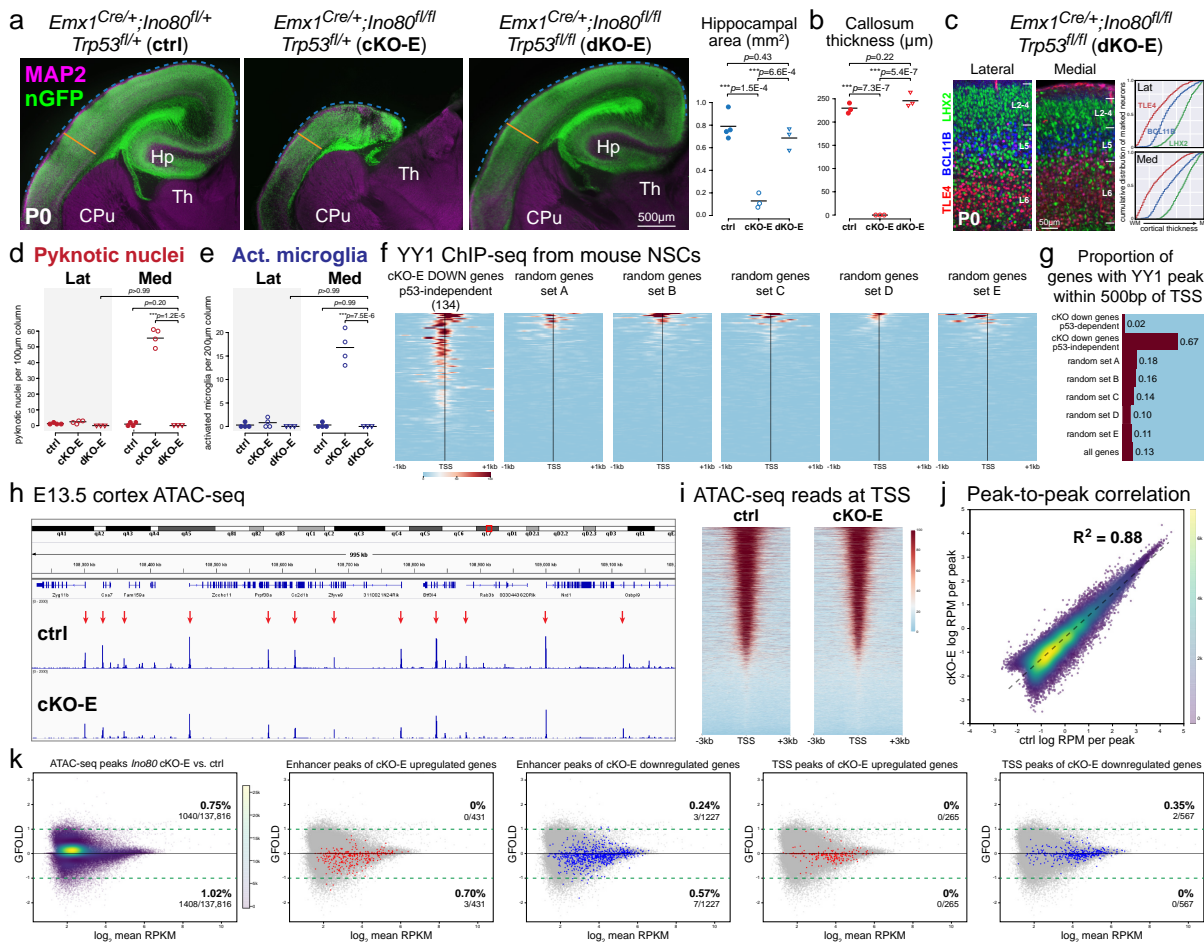

## Supplementary Figure 5

**a**, MAP2 (magenta) and nGFP (green) immunostaining of coronal P0 brain sections. *Ino80* cKO-E, but not *Ino80/Trp53* dKO-E, was characterized by microcephaly and severe hippocampal hypoplasia. Analysis of hippocampal area revealed a significant decrease in cKO-E, but not dKO-E, compared to ctrl (Data are mean, one-way ANOVA with Tukey's post-hoc test, ctrl: n=4, cKO-E: n=3, dKO-E: n=3 animals)

**b**, Analysis of corpus callosum thickness revealed a significant decrease in P0 cKO-E, but not dKO-E, cortex compared to ctrl (Data are mean, one-way ANOVA with Tukey's post-hoc test, n=3 animals)

**c**, Analysis of cumulative distribution of layer marker-expressing neurons through the thickness of cortex from WM to MZ revealed normal lamination in medial and lateral P0 dKO-E cortex (n=3 animals).

**d** and **e**, Quantitative analysis revealed significant increases in pyknosis and morphologically activated (Act.) microglia in medial cKO-E, but not dKO-E, cortex (Data are mean, one-way ANOVA with Tukey's post-hoc test, ctrl: n=4, cKO-E: n=4, dKO-E: n=3 animals).

**f** and **g**, Intersectional analysis of the 134 p53-independent downregulated genes and five sets of randomly selected genes (sets A-E) with published YY1 ChIP-seq data from mouse neural stem cells (NSCs). The 134 p53-independent, cKO-E downregulated genes showed an enrichment of genes with a YY1 peak within 500bp of transcriptional start site (TSS).

**h**, Representative IGV tracts of E13.5 cortex ATAC-seq. Analysis of genome-wide ATAC-seq peaks (arrows) revealed a 91.33% overlap between *Ino80* cKO-E and ctrl.

**i**, Normalized ATAC-seq reads within 3kb of annotated TSSs in *Ino80* cKO-E and ctrl.

**j**, Genome-wide ATAC-seq peak-to-peak correlation of normalized reads per peak between *Ino80* cKO-E and ctrl.

**k**, MA plots of chromatin accessibility changes in cKO-E compared to ctrl. Each dot represents one ATAC-seq peak. GFOLD cutoff of 1.0 is indicated by dashed green line.

## *Ino80* gene regulation

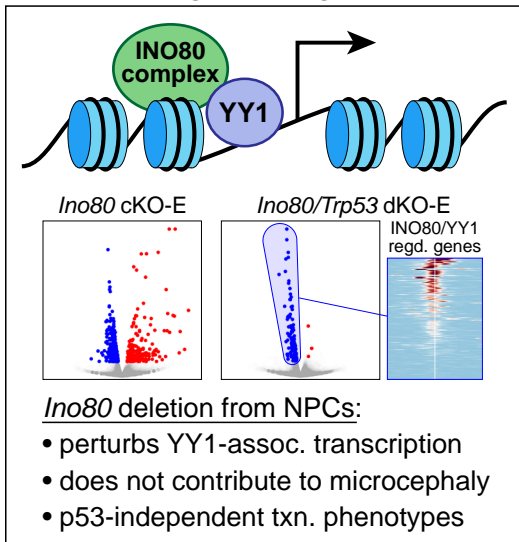

## *Ino80* DNA repair

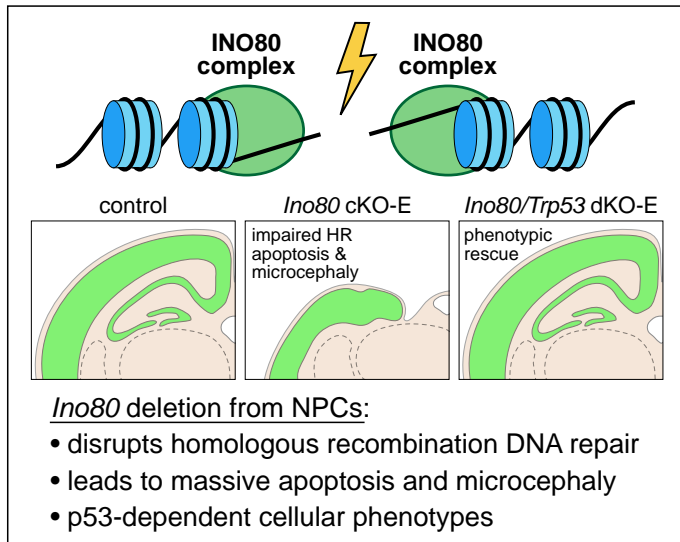

### Supplementary Figure 6

The mechanistically distinct roles of *Ino80* in transcriptional regulation and DNA repair during corticogenesis are illustrated in schematic.

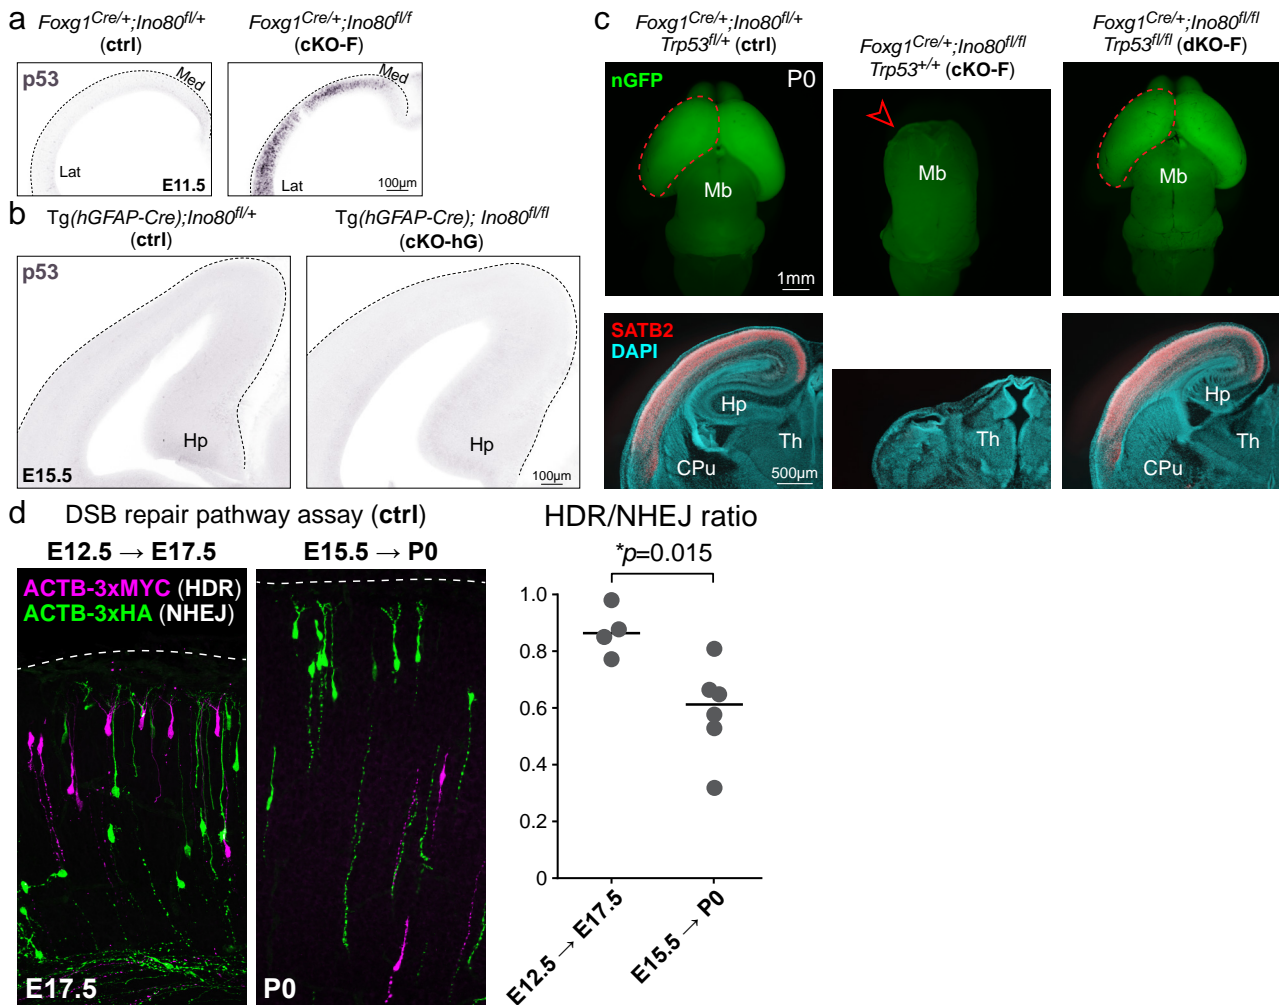

## Supplementary Figure 7

**a**, p53 immunostaining of E11.5 ctrl and *Ino80* cKO-F coronal brain sections. In *Ino80* cKO-F, p53 activation was present in the entire mediolateral extent of the cortex, including lateral neocortex.

**b**, p53 immunostaining of E15.5 ctrl and *Ino80* cKO-hG coronal brain sections. p53 activation was absent from *Ino80* cKO-hG cortex.

**c**, Dorsal view of P0 whole mount brains and SATB2 (red) and DAPI (cyan) staining of P0 brain coronal sections. Single deletion of *Ino80* with *Foxg1<sup>Cre</sup>* (cKO-F) led to forebrain agenesis at P0 (arrowhead). Co-deletion of *Ino80* and *Trp53* with *Foxg1<sup>Cre</sup>* (dKO-F) led to remarkable rescue of cKO-F forebrain agenesis.

**d**, *In vivo* DSB repair pathway assay in control brains. IUE was carried out at E12.5, during largely symmetric NPC divisions, or at E15.5, after most NPCs have transitioned to asymmetric divisions. Brains were analyzed 5 days after IUE. After transition to asymmetric divisions, HDR (ACTB-3xMYC, magenta) was significantly decreased relative to NHEJ (ACTB-3xHA, green; data are mean, two-tailed unpaired t-test, E12.5 → E17.5: n=4, E15.5 → P0: n=6 animals).



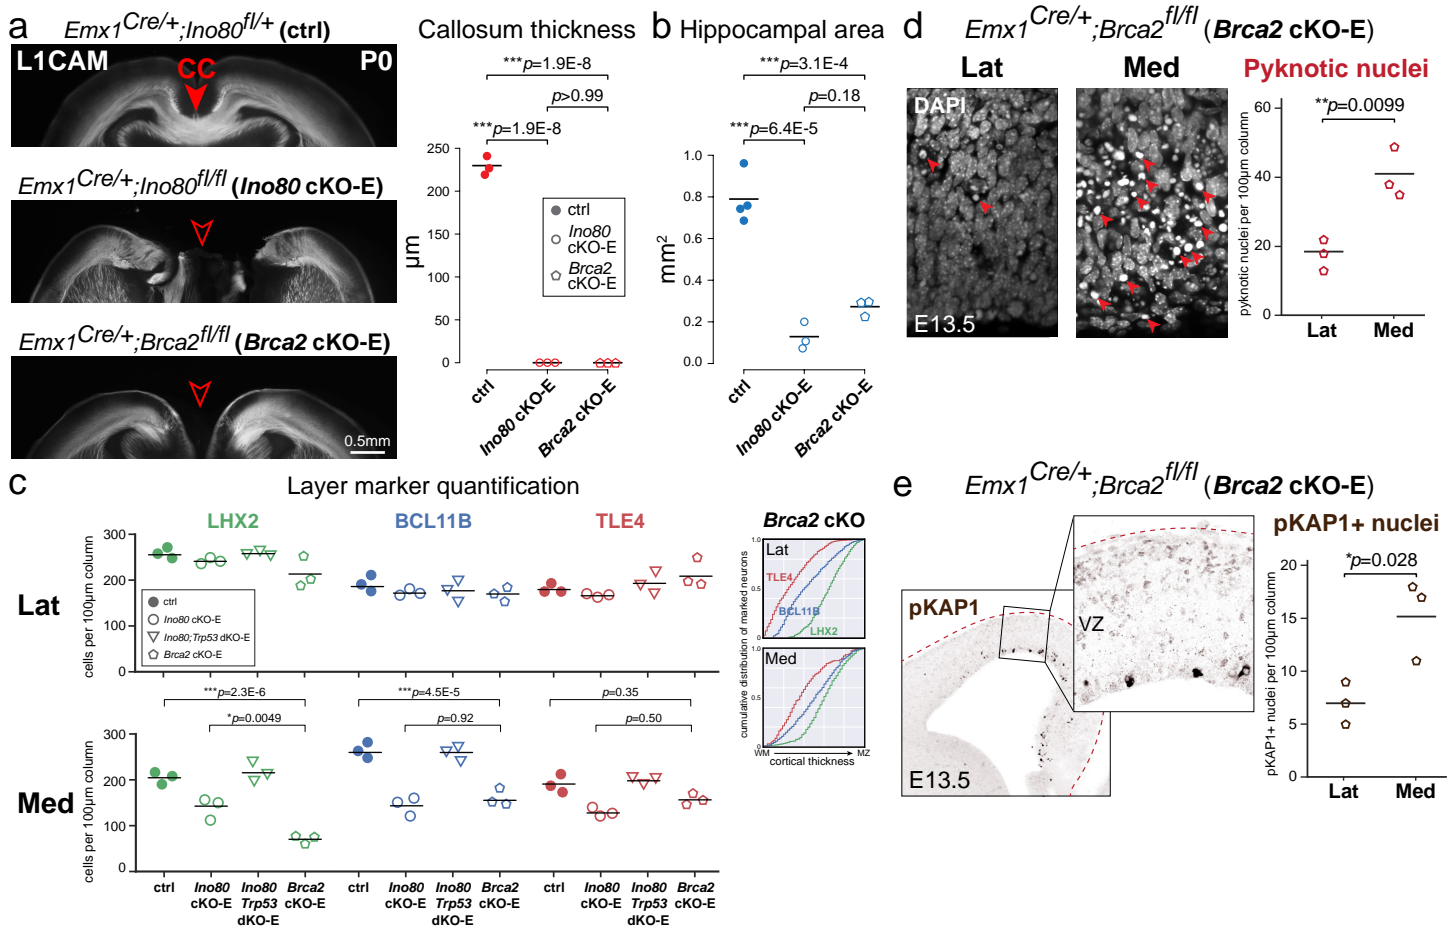

## Supplementary Figure 8

**a**, L1CAM immunostaining (white) of coronal P0 sections. Agenesis of corpus callosum (CC, red arrowhead) was consistently found in *Ino80* cKO-E and *Brca2* cKO-E. Analysis of coronal P0 sections revealed a significant reduction in corpus callosum thickness in *Ino80* cKO-E and *Brca2* cKO-E compared to ctrl (Data are mean, one-way ANOVA with Tukey's post-hoc test,  $n=3$  animals).

**b**, Analysis of coronal P0 sections revealed a significant reduction in hippocampal area in *Ino80* cKO-E and *Brca2* cKO-E compared to ctrl (Data are mean, one-way ANOVA with Tukey's post-hoc test, ctrl:  $n=4$ , *Ino80* cKO-E:  $n=3$ , *Brca2* cKO-E:  $n=3$  animals).

**c**, Analysis of layer marker-expressing neurons in medial (Med) and lateral (Lat) P0 ctrl, *Ino80* cKO-E, *Ino80;Trp53* dKO-E, and *Brca2* cKO-E cortex (Data are mean, one-way ANOVA with Tukey's post-hoc test,  $n=3$  animals).

**d**, Analysis of pyknotic nuclei (arrowheads) in medial and lateral E13.5 *Brca2* cKO-E cortex (Data are mean, two-tailed unpaired t-test,  $n=3$  animals).

**e**, Analysis of pKAP1+ nuclei (arrowheads) in medial and lateral E13.5 *Brca2* cKO-E cortex (Data are mean, two-tailed unpaired t-test,  $n=3$  animals).

Supplementary Table 1. Significantly upregulated genes by UMI RNA-seq (cKO-E vs. ctrl, FDR &lt; 0.001)

| Ensembl Mouse Gene ID  | Gene symbol      | logFC | logCPM | LR     | PValue    | FDR       | p53 target | microglia |
|------------------------|------------------|-------|--------|--------|-----------|-----------|------------|-----------|
| ENSMUSG00000074968.11  | <i>Ano3</i>      | 4.36  | 4.68   | 818.46 | 5.23E-180 | 2.71E-175 |            |           |
| ENSMUSG00000034457.10  | <i>Eda2r</i>     | 3.87  | 3.20   | 287.25 | 1.98E-64  | 5.14E-60  |            |           |
| ENSMUSG00000021185.16  | <i>Dglucy</i>    | 2.96  | 3.25   | 188.13 | 8.13E-43  | 1.06E-38  |            |           |
| ENSMUSG00000020326.7   | <i>Ccng1</i>     | 2.00  | 4.12   | 185.89 | 2.51E-42  | 2.37E-38  |            |           |
| ENSMUSG00000096914.3   | <i>Galnt16</i>   | 1.57  | 6.28   | 185.72 | 2.74E-42  | 2.37E-38  |            |           |
| ENSMUSG00000039488.15  | <i>Cntn5</i>     | 0.95  | 8.22   | 165.57 | 6.86E-38  | 5.08E-34  |            |           |
| ENSMUSG00000030609.18  | <i>Aen</i>       | 1.18  | 5.32   | 160.41 | 9.18E-37  | 5.96E-33  |            |           |
| ENSMUSG00000048458.8   | <i>Fam212b</i>   | 1.93  | 3.56   | 149.37 | 2.38E-34  | 1.37E-30  |            |           |
| ENSMUSG00000023067.13  | <i>Cdkn1a</i>    | 3.62  | 1.90   | 130.07 | 3.95E-30  | 1.58E-26  |            |           |
| ENSMUSG00000063458.12  | <i>Lrm1a</i>     | 1.75  | 3.25   | 108.81 | 1.78E-25  | 6.17E-22  |            |           |
| ENSMUSG00000097039.8   | <i>Pvt1</i>      | 1.27  | 5.97   | 100.01 | 1.51E-23  | 4.36E-20  |            |           |
| ENSMUSG00000024521.7   | <i>Pmaip1</i>    | 5.45  | 1.20   | 97.81  | 4.60E-23  | 1.26E-19  |            |           |
| ENSMUSG00000038776.13  | <i>Ephx1</i>     | 3.74  | 1.46   | 92.89  | 5.54E-22  | 1.37E-18  |            |           |
| ENSMUSG00000004085.14  | <i>Map3k20</i>   | 1.11  | 5.19   | 89.59  | 2.93E-21  | 6.35E-18  |            |           |
| ENSMUSG00000006800.13  | <i>Sulf2</i>     | 1.19  | 4.29   | 89.30  | 3.40E-21  | 7.06E-18  |            |           |
| ENSMUSG00000029304.14  | <i>Spp1</i>      | 4.29  | 1.14   | 88.89  | 4.18E-21  | 8.34E-18  |            |           |
| ENSMUSG00000002985.16  | <i>Apoe</i>      | 1.85  | 3.36   | 86.81  | 1.19E-20  | 2.29E-17  |            |           |
| ENSMUSG00000026249.10  | <i>Serpine2</i>  | 2.39  | 2.34   | 85.21  | 2.69E-20  | 4.81E-17  |            |           |
| ENSMUSG000000057098.14 | <i>Ebf1</i>      | 1.01  | 5.99   | 84.92  | 3.10E-20  | 5.32E-17  |            |           |
| ENSMUSG00000005089.15  | <i>Slc1a2</i>    | 0.95  | 6.17   | 78.87  | 6.63E-19  | 8.82E-16  |            |           |
| ENSMUSG00000066113.16  | <i>Adamts1</i>   | 0.93  | 5.55   | 76.74  | 1.95E-18  | 2.53E-15  |            |           |
| ENSMUSG00000028893.8   | <i>Sesn2</i>     | 2.33  | 2.20   | 75.41  | 3.83E-18  | 4.73E-15  |            |           |
| ENSMUSG00000046159.16  | <i>Chrm3</i>     | 0.81  | 5.68   | 72.59  | 1.60E-17  | 1.88E-14  |            |           |
| ENSMUSG000000059857.15 | <i>Ntng1</i>     | 1.14  | 4.29   | 72.51  | 1.66E-17  | 1.92E-14  |            |           |
| ENSMUSG00000041801.5   | <i>Phlda3</i>    | 2.68  | 1.47   | 67.02  | 2.69E-16  | 2.64E-13  |            |           |
| ENSMUSG000000054612.4  | <i>Mgmt</i>      | 1.43  | 3.62   | 66.62  | 3.29E-16  | 3.16E-13  |            |           |
| ENSMUSG00000017724.14  | <i>Etv4</i>      | 3.70  | 0.89   | 66.24  | 4.00E-16  | 3.56E-13  |            |           |
| ENSMUSG000000085912.1  | <i>Trp53cor1</i> | 3.46  | 1.14   | 66.28  | 3.91E-16  | 3.56E-13  |            |           |
| ENSMUSG00000013089.15  | <i>Etv5</i>      | 1.43  | 4.67   | 65.16  | 6.90E-16  | 5.97E-13  |            |           |
| ENSMUSG00000020053.18  | <i>Igf1</i>      | 3.90  | 0.88   | 63.72  | 1.44E-15  | 1.18E-12  |            |           |
| ENSMUSG00000075324.13  | <i>Fign</i>      | 1.13  | 5.51   | 61.82  | 3.76E-15  | 2.83E-12  |            |           |
| ENSMUSG00000015243.4   | <i>Abca1</i>     | 1.16  | 5.05   | 61.75  | 3.91E-15  | 2.86E-12  |            |           |
| ENSMUSG00000002083.13  | <i>Bbc3</i>      | 2.13  | 2.01   | 60.67  | 6.74E-15  | 4.73E-12  |            |           |
| ENSMUSG00000029212.11  | <i>Gabbr1</i>    | 1.27  | 4.33   | 59.12  | 1.48E-14  | 9.62E-12  |            |           |
| ENSMUSG00000028364.15  | <i>Tnc</i>       | 1.63  | 3.83   | 54.25  | 1.77E-13  | 9.36E-11  |            |           |
| ENSMUSG00000010476.14  | <i>Ebf3</i>      | 0.88  | 5.26   | 52.79  | 3.71E-13  | 1.78E-10  |            |           |
| ENSMUSG00000064293.14  | <i>Cntn4</i>     | 1.58  | 4.37   | 51.48  | 7.25E-13  | 3.30E-10  |            |           |
| ENSMUSG000000039419.17 | <i>Cntnap2</i>   | 0.70  | 7.42   | 51.49  | 7.18E-13  | 3.30E-10  |            |           |
| ENSMUSG00000042286.13  | <i>Stab1</i>     | 1.92  | 2.16   | 51.35  | 7.72E-13  | 3.48E-10  |            |           |
| ENSMUSG000000051855.15 | <i>Mest</i>      | 0.82  | 5.16   | 51.06  | 8.96E-13  | 3.97E-10  |            |           |
| ENSMUSG00000042453.14  | <i>Reln</i>      | 0.60  | 8.79   | 49.85  | 1.66E-12  | 7.10E-10  |            |           |
| ENSMUSG00000046805.9   | <i>Mpeg1</i>     | 2.48  | 1.10   | 45.73  | 1.36E-11  | 5.15E-09  |            |           |
| ENSMUSG000000024376.6  | <i>Epb4114a</i>  | 0.63  | 5.30   | 45.09  | 1.88E-11  | 6.94E-09  |            |           |
| ENSMUSG00000029093.14  | <i>Sorcs2</i>    | 0.79  | 4.71   | 44.95  | 2.03E-11  | 7.35E-09  |            |           |
| ENSMUSG00000027674.16  | <i>Pex5l</i>     | 0.86  | 4.47   | 44.02  | 3.24E-11  | 1.13E-08  |            |           |
| ENSMUSG00000029088.16  | <i>Kcnip4</i>    | 0.87  | 5.94   | 43.61  | 4.01E-11  | 1.38E-08  |            |           |
| ENSMUSG000000027663.12 | <i>Zmat3</i>     | 0.63  | 5.35   | 43.36  | 4.56E-11  | 1.55E-08  |            |           |
| ENSMUSG00000037605.16  | <i>Adgrl3</i>    | 1.04  | 8.86   | 43.30  | 4.71E-11  | 1.58E-08  |            |           |
| ENSMUSG00000031478.16  | <i>Nek3</i>      | 0.72  | 4.64   | 42.90  | 5.75E-11  | 1.91E-08  |            |           |
| ENSMUSG00000045083.14  | <i>Lingo2</i>    | 1.02  | 6.38   | 42.62  | 6.66E-11  | 2.15E-08  |            |           |
| ENSMUSG00000056427.10  | <i>Slit3</i>     | 1.16  | 7.62   | 42.37  | 7.56E-11  | 2.39E-08  |            |           |
| ENSMUSG000000022762.17 | <i>Ncam2</i>     | 0.56  | 8.35   | 42.17  | 8.35E-11  | 2.61E-08  |            |           |
| ENSMUSG00000021730.8   | <i>Hcn1</i>      | 1.33  | 3.87   | 39.96  | 2.59E-10  | 7.59E-08  |            |           |
| ENSMUSG00000038718.15  | <i>Pbx3</i>      | 0.82  | 7.11   | 39.52  | 3.25E-10  | 9.43E-08  |            |           |
| ENSMUSG00000022074.5   | <i>Tnfrsf10b</i> | 1.73  | 1.71   | 39.29  | 3.65E-10  | 1.04E-07  |            |           |
| ENSMUSG00000021668.15  | <i>Polk</i>      | 0.74  | 4.47   | 39.05  | 4.13E-10  | 1.15E-07  |            |           |
| ENSMUSG000000043531.16 | <i>Sorcs1</i>    | 0.74  | 6.48   | 38.54  | 5.35E-10  | 1.44E-07  |            |           |
| ENSMUSG00000022148.15  | <i>Fyb</i>       | 2.27  | 1.04   | 38.10  | 6.73E-10  | 1.77E-07  |            |           |
| ENSMUSG00000021448.7   | <i>Shc3</i>      | 0.76  | 6.32   | 38.08  | 6.79E-10  | 1.78E-07  |            |           |
| ENSMUSG00000034825.14  | <i>Nrip3</i>     | 1.72  | 2.09   | 37.78  | 7.93E-10  | 2.05E-07  |            |           |
| ENSMUSG00000015766.14  | <i>Eps8</i>      | 0.77  | 4.14   | 37.76  | 8.00E-10  | 2.06E-07  |            |           |
| ENSMUSG000000033777.3  | <i>Tlr13</i>     | 5.13  | -0.09  | 37.59  | 8.74E-10  | 2.23E-07  |            |           |
| ENSMUSG00000004609.11  | <i>Cd33</i>      | 2.79  | 0.72   | 37.49  | 9.19E-10  | 2.34E-07  |            |           |
| ENSMUSG00000032625.14  | <i>Thsd7a</i>    | 1.55  | 4.78   | 37.31  | 1.01E-09  | 2.55E-07  |            |           |
| ENSMUSG00000037509.19  | <i>Arhgef4</i>   | 0.90  | 4.55   | 37.03  | 1.17E-09  | 2.91E-07  |            |           |
| ENSMUSG00000026970.16  | <i>Rbms1</i>     | 0.67  | 4.89   | 36.97  | 1.20E-09  | 2.98E-07  |            |           |
| ENSMUSG00000036452.17  | <i>Arhgap26</i>  | 0.69  | 5.44   | 36.76  | 1.34E-09  | 3.27E-07  |            |           |
| ENSMUSG00000036192.15  | <i>Rorb</i>      | 0.73  | 6.06   | 36.67  | 1.40E-09  | 3.41E-07  |            |           |

|                        |                 |      |      |       |          |          |  |
|------------------------|-----------------|------|------|-------|----------|----------|--|
| ENSMUSG00000063600.14  | <i>Egfem1</i>   | 1.30 | 5.36 | 36.48 | 1.54E-09 | 3.73E-07 |  |
| ENSMUSG00000026786.14  | <i>Apbb1ip</i>  | 2.76 | 0.79 | 35.68 | 2.33E-09 | 5.41E-07 |  |
| ENSMUSG00000027419.9   | <i>Pcsk2</i>    | 0.63 | 5.77 | 35.65 | 2.36E-09 | 5.46E-07 |  |
| ENSMUSG00000028581.17  | <i>Laptm5</i>   | 2.78 | 0.93 | 35.43 | 2.65E-09 | 6.08E-07 |  |
| ENSMUSG00000070780.11  | <i>Rbm47</i>    | 2.65 | 0.72 | 35.29 | 2.84E-09 | 6.47E-07 |  |
| ENSMUSG00000063434.5   | <i>Sorcs3</i>   | 1.17 | 3.95 | 34.96 | 3.36E-09 | 7.55E-07 |  |
| ENSMUSG00000034154.15  | <i>Ino80</i>    | 0.46 | 6.66 | 34.51 | 4.24E-09 | 9.36E-07 |  |
| ENSMUSG00000003279.16  | <i>Dlgap1</i>   | 1.02 | 7.39 | 34.50 | 4.26E-09 | 9.38E-07 |  |
| ENSMUSG00000031618.13  | <i>Nr3c2</i>    | 1.45 | 3.06 | 34.38 | 4.54E-09 | 9.85E-07 |  |
| ENSMUSG00000019852.7   | <i>Arfgef3</i>  | 0.82 | 4.52 | 34.15 | 5.10E-09 | 1.10E-06 |  |
| ENSMUSG00000026527.13  | <i>Rgs7</i>     | 0.69 | 5.27 | 34.13 | 5.15E-09 | 1.10E-06 |  |
| ENSMUSG00000051506.16  | <i>Wdfy4</i>    | 2.97 | 0.45 | 34.03 | 5.44E-09 | 1.16E-06 |  |
| ENSMUSG00000057182.14  | <i>Scn3a</i>    | 0.80 | 5.85 | 33.97 | 5.58E-09 | 1.19E-06 |  |
| ENSMUSG00000056158.14  | <i>Car10</i>    | 1.42 | 2.44 | 33.60 | 6.78E-09 | 1.41E-06 |  |
| ENSMUSG00000049420.9   | <i>Tmem200a</i> | 0.86 | 4.50 | 33.52 | 7.05E-09 | 1.46E-06 |  |
| ENSMUSG00000042228.14  | <i>Lyn</i>      | 1.21 | 2.58 | 33.37 | 7.64E-09 | 1.55E-06 |  |
| ENSMUSG00000026312.17  | <i>Cdh7</i>     | 0.80 | 4.34 | 32.73 | 1.06E-08 | 2.11E-06 |  |
| ENSMUSG00000036896.5   | <i>C1qc</i>     | 2.57 | 0.77 | 32.72 | 1.07E-08 | 2.12E-06 |  |
| ENSMUSG00000019647.16  | <i>Sema6a</i>   | 0.67 | 6.97 | 32.47 | 1.21E-08 | 2.39E-06 |  |
| ENSMUSG00000046818.7   | <i>Ddit4l</i>   | 1.99 | 1.64 | 32.28 | 1.33E-08 | 2.59E-06 |  |
| ENSMUSG00000059921.15  | <i>Unc5c</i>    | 1.20 | 4.36 | 32.26 | 1.35E-08 | 2.61E-06 |  |
| ENSMUSG00000029816.10  | <i>Gpnmb</i>    | 4.69 | 0.21 | 32.22 | 1.38E-08 | 2.64E-06 |  |
| ENSMUSG00000031129.9   | <i>Slc9a9</i>   | 0.73 | 3.76 | 32.05 | 1.50E-08 | 2.85E-06 |  |
| ENSMUSG00000021991.8   | <i>Cacna2d3</i> | 0.84 | 6.36 | 31.88 | 1.64E-08 | 3.09E-06 |  |
| ENSMUSG00000042596.7   | <i>Tfap2d</i>   | 1.87 | 3.64 | 31.78 | 1.73E-08 | 3.24E-06 |  |
| ENSMUSG00000015852.13  | <i>Fcrls</i>    | 2.53 | 0.74 | 31.47 | 2.03E-08 | 3.73E-06 |  |
| ENSMUSG00000037624.15  | <i>Kcnk2</i>    | 0.77 | 4.92 | 31.37 | 2.13E-08 | 3.89E-06 |  |
| ENSMUSG00000048756.11  | <i>Foxo3</i>    | 0.47 | 6.20 | 31.27 | 2.24E-08 | 4.07E-06 |  |
| ENSMUSG00000021557.14  | <i>Agtpbp1</i>  | 0.49 | 6.77 | 31.18 | 2.35E-08 | 4.23E-06 |  |
| ENSMUSG00000024621.15  | <i>Csf1r</i>    | 2.11 | 1.38 | 30.70 | 3.02E-08 | 5.36E-06 |  |
| ENSMUSG00000027737.10  | <i>Slc7a11</i>  | 2.21 | 1.54 | 30.60 | 3.18E-08 | 5.59E-06 |  |
| ENSMUSG00000006219.12  | <i>Fblim1</i>   | 1.67 | 1.55 | 30.42 | 3.48E-08 | 6.10E-06 |  |
| ENSMUSG00000070695.4   | <i>Cntnap5a</i> | 1.28 | 3.16 | 30.22 | 3.86E-08 | 6.71E-06 |  |
| ENSMUSG00000019828.13  | <i>Grm1</i>     | 0.84 | 4.67 | 30.04 | 4.24E-08 | 7.34E-06 |  |
| ENSMUSG00000007891.16  | <i>Ctsd</i>     | 1.30 | 2.18 | 29.98 | 4.37E-08 | 7.51E-06 |  |
| ENSMUSG000000106379.1  | <i>Lhfpl3</i>   | 1.41 | 6.02 | 29.73 | 4.97E-08 | 8.48E-06 |  |
| ENSMUSG00000036402.13  | <i>Gng12</i>    | 0.61 | 4.59 | 29.58 | 5.36E-08 | 9.10E-06 |  |
| ENSMUSG00000040552.8   | <i>C3ar1</i>    | 2.73 | 0.45 | 29.37 | 5.98E-08 | 1.00E-05 |  |
| ENSMUSG00000029026.16  | <i>Trp73</i>    | 0.93 | 3.82 | 29.27 | 6.30E-08 | 1.04E-05 |  |
| ENSMUSG000000039057.11 | <i>Myo16</i>    | 0.73 | 5.89 | 29.26 | 6.32E-08 | 1.04E-05 |  |
| ENSMUSG00000020143.15  | <i>Dock2</i>    | 1.51 | 1.68 | 29.15 | 6.71E-08 | 1.09E-05 |  |
| ENSMUSG00000019874.11  | <i>Fabp7</i>    | 0.53 | 5.78 | 29.09 | 6.90E-08 | 1.11E-05 |  |
| ENSMUSG00000020389.19  | <i>Cdkl3</i>    | 0.57 | 4.92 | 29.07 | 6.98E-08 | 1.12E-05 |  |
| ENSMUSG00000055540.15  | <i>Epha6</i>    | 0.83 | 4.99 | 29.04 | 7.10E-08 | 1.13E-05 |  |
| ENSMUSG00000000560.9   | <i>Gabra2</i>   | 0.85 | 6.56 | 29.02 | 7.18E-08 | 1.14E-05 |  |
| ENSMUSG00000040918.12  | <i>Slc19a2</i>  | 1.12 | 2.65 | 28.83 | 7.89E-08 | 1.24E-05 |  |
| ENSMUSG00000020431.5   | <i>Adcy1</i>    | 0.76 | 4.77 | 28.67 | 8.57E-08 | 1.33E-05 |  |
| ENSMUSG00000044912.10  | <i>Syt16</i>    | 0.87 | 5.62 | 28.65 | 8.68E-08 | 1.34E-05 |  |
| ENSMUSG00000053626.5   | <i>Tll1</i>     | 1.84 | 1.79 | 28.63 | 8.74E-08 | 1.34E-05 |  |
| ENSMUSG00000038147.13  | <i>Cd84</i>     | 2.54 | 0.79 | 28.53 | 9.22E-08 | 1.41E-05 |  |
| ENSMUSG00000044071.8   | <i>Fam19a2</i>  | 0.95 | 5.97 | 28.23 | 1.08E-07 | 1.61E-05 |  |
| ENSMUSG00000035131.14  | <i>Brinp3</i>   | 1.37 | 3.16 | 28.12 | 1.14E-07 | 1.70E-05 |  |
| ENSMUSG00000025969.15  | <i>Nrp2</i>     | 0.53 | 5.99 | 28.07 | 1.17E-07 | 1.73E-05 |  |
| ENSMUSG00000027971.16  | <i>Ndst4</i>    | 0.70 | 4.28 | 27.83 | 1.32E-07 | 1.92E-05 |  |
| ENSMUSG00000028172.5   | <i>Tacr3</i>    | 1.56 | 1.79 | 27.82 | 1.33E-07 | 1.93E-05 |  |
| ENSMUSG00000036264.9   | <i>Fstl4</i>    | 1.97 | 3.51 | 27.64 | 1.46E-07 | 2.09E-05 |  |
| ENSMUSG00000037855.15  | <i>Zfp365</i>   | 1.58 | 1.74 | 27.20 | 1.84E-07 | 2.56E-05 |  |
| ENSMUSG00000029211.11  | <i>Gabra4</i>   | 1.04 | 3.12 | 27.07 | 1.96E-07 | 2.71E-05 |  |
| ENSMUSG00000026430.16  | <i>Rassf5</i>   | 2.22 | 0.89 | 27.06 | 1.98E-07 | 2.73E-05 |  |
| ENSMUSG00000031075.18  | <i>Ano1</i>     | 1.60 | 3.38 | 26.82 | 2.24E-07 | 3.07E-05 |  |
| ENSMUSG00000051920.6   | <i>Rspo2</i>    | 3.57 | 2.65 | 26.78 | 2.27E-07 | 3.08E-05 |  |
| ENSMUSG00000042256.4   | <i>Ptchd4</i>   | 0.69 | 5.47 | 26.55 | 2.57E-07 | 3.46E-05 |  |
| ENSMUSG00000002944.15  | <i>Cd36</i>     | 3.08 | 0.20 | 26.45 | 2.71E-07 | 3.61E-05 |  |
| ENSMUSG00000035270.15  | <i>Impg2</i>    | 0.95 | 3.60 | 26.26 | 2.98E-07 | 3.97E-05 |  |
| ENSMUSG00000025790.14  | <i>Slco3a1</i>  | 0.54 | 7.21 | 26.18 | 3.10E-07 | 4.11E-05 |  |
| ENSMUSG00000050663.7   | <i>Trhde</i>    | 1.42 | 2.11 | 26.17 | 3.12E-07 | 4.13E-05 |  |
| ENSMUSG00000004113.18  | <i>Cacna1b</i>  | 0.72 | 6.31 | 26.01 | 3.40E-07 | 4.48E-05 |  |
| ENSMUSG000000026048.16 | <i>Erc5</i>     | 0.44 | 5.94 | 25.49 | 4.45E-07 | 5.77E-05 |  |
| ENSMUSG00000021466.12  | <i>Ptch1</i>    | 0.84 | 4.12 | 25.36 | 4.75E-07 | 6.09E-05 |  |
| ENSMUSG00000059895.12  | <i>Ptp4a3</i>   | 0.86 | 3.08 | 25.21 | 5.15E-07 | 6.54E-05 |  |
| ENSMUSG00000062762.16  | <i>Ei24</i>     | 0.53 | 5.09 | 24.92 | 5.97E-07 | 7.42E-05 |  |
| ENSMUSG00000068748.7   | <i>Ptprz1</i>   | 0.48 | 8.62 | 24.92 | 5.97E-07 | 7.42E-05 |  |

|                       |                 |      |      |       |          |          |  |
|-----------------------|-----------------|------|------|-------|----------|----------|--|
| ENSMUSG00000026604.17 | <i>Ptpn14</i>   | 1.56 | 2.45 | 24.74 | 6.55E-07 | 8.05E-05 |  |
| ENSMUSG00000021939.7  | <i>Ctsb</i>     | 0.65 | 5.12 | 24.72 | 6.64E-07 | 8.14E-05 |  |
| ENSMUSG00000044667.12 | <i>Plppr4</i>   | 1.02 | 2.50 | 24.31 | 8.20E-07 | 9.88E-05 |  |
| ENSMUSG00000025938.16 | <i>Slco5a1</i>  | 0.46 | 6.10 | 24.24 | 8.52E-07 | 0.000102 |  |
| ENSMUSG00000029287.14 | <i>Tgfb3</i>    | 1.61 | 2.08 | 24.10 | 9.13E-07 | 0.000108 |  |
| ENSMUSG00000030518.17 | <i>Fam189a1</i> | 0.71 | 3.96 | 24.03 | 9.49E-07 | 0.000112 |  |
| ENSMUSG00000044042.18 | <i>Fmn1</i>     | 1.69 | 1.07 | 23.97 | 9.77E-07 | 0.000115 |  |
| ENSMUSG00000055022.14 | <i>Cntn1</i>    | 0.70 | 5.15 | 23.90 | 1.02E-06 | 0.000119 |  |
| ENSMUSG00000021190.14 | <i>Lgmn</i>     | 0.63 | 4.04 | 23.81 | 1.07E-06 | 0.000124 |  |
| ENSMUSG00000033676.13 | <i>Gabrb3</i>   | 0.72 | 7.30 | 23.75 | 1.10E-06 | 0.000127 |  |
| ENSMUSG00000032577.16 | <i>Mapkapk3</i> | 1.54 | 1.46 | 23.31 | 1.38E-06 | 0.000156 |  |
| ENSMUSG00000028937.14 | <i>Acot7</i>    | 0.50 | 5.23 | 23.23 | 1.44E-06 | 0.000162 |  |
| ENSMUSG00000024565.8  | <i>Sall3</i>    | 0.76 | 3.53 | 23.10 | 1.54E-06 | 0.000171 |  |
| ENSMUSG00000004730.14 | <i>Adgre1</i>   | 1.92 | 0.90 | 22.97 | 1.65E-06 | 0.000181 |  |
| ENSMUSG00000036466.17 | <i>Megf11</i>   | 0.82 | 4.05 | 22.89 | 1.71E-06 | 0.000187 |  |
| ENSMUSG00000015950.13 | <i>Ncf1</i>     | 1.66 | 1.02 | 22.85 | 1.75E-06 | 0.000191 |  |
| ENSMUSG00000032338.9  | <i>Hcn4</i>     | 0.78 | 3.46 | 22.79 | 1.80E-06 | 0.000195 |  |
| ENSMUSG00000030020.13 | <i>Prickle2</i> | 0.61 | 6.18 | 22.74 | 1.85E-06 | 0.000200 |  |
| ENSMUSG00000044176.11 | <i>Spink10</i>  | 0.49 | 5.45 | 22.73 | 1.86E-06 | 0.000201 |  |
| ENSMUSG00000024300.16 | <i>Myo1f</i>    | 2.47 | 0.73 | 22.54 | 2.06E-06 | 0.000219 |  |
| ENSMUSG00000058975.7  | <i>Kcnc1</i>    | 0.74 | 4.60 | 22.53 | 2.07E-06 | 0.000220 |  |
| ENSMUSG00000044252.17 | <i>Osbp1a</i>   | 0.46 | 5.61 | 22.53 | 2.07E-06 | 0.000220 |  |
| ENSMUSG00000036905.8  | <i>C1qb</i>     | 2.18 | 0.56 | 22.48 | 2.12E-06 | 0.000224 |  |
| ENSMUSG00000027016.17 | <i>Zfp385b</i>  | 1.35 | 2.56 | 22.40 | 2.21E-06 | 0.000233 |  |
| ENSMUSG00000052387.15 | <i>Trpm3</i>    | 0.79 | 6.27 | 22.32 | 2.30E-06 | 0.000242 |  |
| ENSMUSG00000079022.9  | <i>Col22a1</i>  | 1.37 | 4.00 | 22.14 | 2.53E-06 | 0.000262 |  |
| ENSMUSG00000051951.5  | <i>Xkr4</i>     | 0.71 | 7.20 | 21.97 | 2.77E-06 | 0.000283 |  |
| ENSMUSG00000036887.5  | <i>C1qa</i>     | 3.29 | 0.12 | 21.94 | 2.82E-06 | 0.000286 |  |
| ENSMUSG00000042851.17 | <i>Zc3h6</i>    | 0.72 | 5.05 | 21.74 | 3.12E-06 | 0.000313 |  |
| ENSMUSG00000005873.5  | <i>Reep5</i>    | 0.54 | 4.50 | 21.68 | 3.23E-06 | 0.000323 |  |
| ENSMUSG00000010066.15 | <i>Cacna2d2</i> | 0.69 | 4.50 | 21.61 | 3.34E-06 | 0.000332 |  |
| ENSMUSG00000033308.16 | <i>Dpyd</i>     | 0.68 | 4.21 | 21.54 | 3.47E-06 | 0.000342 |  |
| ENSMUSG00000009876.13 | <i>Cox4i2</i>   | 2.02 | 0.56 | 21.39 | 3.75E-06 | 0.000368 |  |
| ENSMUSG00000022523.9  | <i>Fgf12</i>    | 0.80 | 4.91 | 21.05 | 4.48E-06 | 0.000431 |  |
| ENSMUSG00000056755.13 | <i>Grm7</i>     | 0.83 | 5.12 | 20.89 | 4.85E-06 | 0.000463 |  |
| ENSMUSG00000053025.13 | <i>Sv2b</i>     | 0.56 | 5.41 | 20.90 | 4.85E-06 | 0.000463 |  |
| ENSMUSG00000022935.15 | <i>Grik1</i>    | 0.56 | 6.32 | 20.81 | 5.07E-06 | 0.000480 |  |
| ENSMUSG00000032452.12 | <i>Clstn2</i>   | 0.62 | 6.93 | 20.75 | 5.24E-06 | 0.000491 |  |
| ENSMUSG00000020902.12 | <i>Ntn1</i>     | 0.89 | 2.86 | 20.56 | 5.79E-06 | 0.000533 |  |
| ENSMUSG00000026288.14 | <i>Inpp5d</i>   | 1.22 | 2.20 | 20.46 | 6.09E-06 | 0.000553 |  |
| ENSMUSG00000041710.4  | <i>Trpc5</i>    | 1.17 | 3.10 | 20.46 | 6.10E-06 | 0.000553 |  |
| ENSMUSG00000036006.19 | <i>Ripor2</i>   | 0.79 | 3.99 | 20.18 | 7.03E-06 | 0.000625 |  |
| ENSMUSG00000040855.15 | <i>Reps2</i>    | 0.87 | 3.50 | 20.15 | 7.15E-06 | 0.000634 |  |
| ENSMUSG00000037725.8  | <i>Ckap2</i>    | 0.41 | 5.28 | 20.10 | 7.36E-06 | 0.000651 |  |
| ENSMUSG00000011256.16 | <i>Adam19</i>   | 0.58 | 4.88 | 20.09 | 7.38E-06 | 0.000651 |  |
| ENSMUSG00000019880.10 | <i>Rspo3</i>    | 0.76 | 5.22 | 20.08 | 7.44E-06 | 0.000655 |  |
| ENSMUSG00000040420.14 | <i>Cdh18</i>    | 1.05 | 2.44 | 20.03 | 7.64E-06 | 0.000669 |  |
| ENSMUSG00000062151.13 | <i>Unc13c</i>   | 1.74 | 2.64 | 19.99 | 7.77E-06 | 0.000678 |  |
| ENSMUSG00000041272.11 | <i>Tox</i>      | 0.60 | 7.84 | 19.90 | 8.18E-06 | 0.000707 |  |
| ENSMUSG00000040265.16 | <i>Dnm3</i>     | 0.82 | 5.88 | 19.79 | 8.63E-06 | 0.000744 |  |
| ENSMUSG00000051354.14 | <i>Samd3</i>    | 1.90 | 1.32 | 19.77 | 8.72E-06 | 0.000751 |  |
| ENSMUSG00000057897.14 | <i>Camk2b</i>   | 0.76 | 5.03 | 19.74 | 8.86E-06 | 0.000760 |  |
| ENSMUSG00000022817.14 | <i>Itgb5</i>    | 1.38 | 2.02 | 19.72 | 8.95E-06 | 0.000767 |  |
| ENSMUSG00000061576.15 | <i>Dpp6</i>     | 0.58 | 7.32 | 19.66 | 9.23E-06 | 0.000790 |  |
| ENSMUSG00000005413.8  | <i>Hmox1</i>    | 1.44 | 1.46 | 19.52 | 9.94E-06 | 0.000845 |  |
| ENSMUSG00000049583.15 | <i>Grm5</i>     | 0.95 | 5.74 | 19.51 | 1.00E-05 | 0.000850 |  |
| ENSMUSG00000058672.7  | <i>Tubb2a</i>   | 0.62 | 4.21 | 19.39 | 1.06E-05 | 0.000897 |  |
| ENSMUSG00000045438.12 | <i>Cox19</i>    | 0.64 | 3.59 | 19.37 | 1.08E-05 | 0.000906 |  |
| ENSMUSG00000033910.13 | <i>Gucy1a3</i>  | 0.80 | 3.21 | 19.35 | 1.09E-05 | 0.000913 |  |
| ENSMUSG00000022901.13 | <i>Cd86</i>     | 2.83 | 0.09 | 19.29 | 1.12E-05 | 0.000940 |  |
| ENSMUSG00000075316.11 | <i>Scn9a</i>    | 1.32 | 2.14 | 19.29 | 1.12E-05 | 0.000940 |  |
| ENSMUSG00000045658.16 | <i>Pid1</i>     | 0.66 | 6.41 | 19.28 | 1.13E-05 | 0.000943 |  |
| ENSMUSG00000020096.20 | <i>Tbata</i>    | 1.97 | 0.54 | 19.24 | 1.15E-05 | 0.000958 |  |
| ENSMUSG00000047495.15 | <i>Dlgap2</i>   | 0.81 | 6.89 | 19.23 | 1.16E-05 | 0.000959 |  |
| ENSMUSG0000004631.15  | <i>Sgce</i>     | 0.42 | 5.89 | 19.19 | 1.18E-05 | 0.000972 |  |

P-value calculated with likelihood ratio tests. Adjusted P-value for multiple testing calculated using the Benjamini-Hochberg method (FDR).

Supplementary Table 2. Significantly downregulated genes by UMI RNA-seq (cKO-E vs. ctrl, FDR &lt; 0.001)

| Ensembl Mouse Gene ID   | Gene symbol          | logFC | logCPM | LR     | PValue   | FDR      |
|-------------------------|----------------------|-------|--------|--------|----------|----------|
| ENSMUSG00000017692.8    | <i>Rhbdl3</i>        | -1.17 | 6.76   | 192.27 | 1.02E-43 | 1.76E-39 |
| ENSMUSG000000034462.9   | <i>Pkd2</i>          | -1.05 | 5.96   | 142.05 | 9.50E-33 | 4.93E-29 |
| ENSMUSG000000032238.17  | <i>Rora</i>          | -1.01 | 7.78   | 134.06 | 5.29E-31 | 2.50E-27 |
| ENSMUSG000000022672.8   | <i>Prkdc</i>         | -1.03 | 6.14   | 130.24 | 3.63E-30 | 1.57E-26 |
| ENSMUSG000000040943.12  | <i>Tet2</i>          | -0.98 | 6.83   | 127.03 | 1.83E-29 | 6.79E-26 |
| ENSMUSG000000030061.16  | <i>Uba3</i>          | -1.05 | 5.66   | 104.61 | 1.49E-24 | 4.84E-21 |
| ENSMUSG000000058729.13  | <i>Lin9</i>          | -1.06 | 5.33   | 103.34 | 2.83E-24 | 8.64E-21 |
| ENSMUSG000000036371.6   | <i>Serbp1</i>        | -0.81 | 7.33   | 96.14  | 1.07E-22 | 2.77E-19 |
| ENSMUSG000000027204.13  | <i>Fbn1</i>          | -1.01 | 5.23   | 91.17  | 1.32E-21 | 3.12E-18 |
| ENSMUSG000000021846.8   | <i>Peli2</i>         | -0.93 | 6.83   | 85.41  | 2.42E-20 | 4.50E-17 |
| ENSMUSG000000034687.8   | <i>Fras1</i>         | -0.72 | 7.42   | 84.88  | 3.18E-20 | 5.32E-17 |
| ENSMUSG000000037386.15  | <i>Rims2</i>         | -0.82 | 8.08   | 83.36  | 6.82E-20 | 1.11E-16 |
| ENSMUSG000000084799.7   | <i>Ino80dos</i>      | -1.20 | 4.31   | 81.28  | 1.96E-19 | 3.00E-16 |
| ENSMUSG000000057914.15  | <i>Cacnb2</i>        | -0.98 | 7.48   | 80.87  | 2.41E-19 | 3.57E-16 |
| ENSMUSG000000034295.9   | <i>Fhod3</i>         | -0.68 | 7.87   | 80.71  | 2.62E-19 | 3.77E-16 |
| ENSMUSG000000020564.17  | <i>Atxn711</i>       | -0.68 | 7.45   | 80.60  | 2.77E-19 | 3.89E-16 |
| ENSMUSG000000025154.14  | <i>Arhgap19</i>      | -1.33 | 4.50   | 80.29  | 3.24E-19 | 4.42E-16 |
| ENSMUSG000000039967.14  | <i>Zfp292</i>        | -0.69 | 8.27   | 76.55  | 2.15E-18 | 2.72E-15 |
| ENSMUSG000000031284.16  | <i>Pak3</i>          | -0.67 | 8.11   | 72.72  | 1.50E-17 | 1.81E-14 |
| ENSMUSG000000056476.13  | <i>Med12l</i>        | -0.74 | 6.94   | 72.46  | 1.71E-17 | 1.93E-14 |
| ENSMUSG000000024940.10  | <i>Ltbp3</i>         | -1.06 | 4.25   | 72.14  | 2.01E-17 | 2.22E-14 |
| ENSMUSG000000036617.16  | <i>Etl4</i>          | -0.74 | 9.27   | 69.60  | 7.27E-17 | 7.86E-14 |
| ENSMUSG000000002459.17  | <i>Rgs20</i>         | -0.79 | 7.26   | 69.45  | 7.85E-17 | 8.15E-14 |
| ENSMUSG0000000051339.10 | <i>2900026A02Rik</i> | -0.91 | 5.10   | 69.49  | 7.70E-17 | 8.15E-14 |
| ENSMUSG000000021379.1   | <i>Id4</i>           | -1.07 | 6.88   | 68.01  | 1.63E-16 | 1.66E-13 |
| ENSMUSG000000036023.5   | <i>Parp2</i>         | -1.21 | 3.86   | 67.92  | 1.70E-16 | 1.70E-13 |
| ENSMUSG000000018501.17  | <i>Ncor1</i>         | -0.68 | 8.37   | 66.59  | 3.35E-16 | 3.16E-13 |
| ENSMUSG0000000014426.8  | <i>Map3k4</i>        | -0.63 | 6.09   | 66.44  | 3.60E-16 | 3.34E-13 |
| ENSMUSG000000040488.17  | <i>Ltbp4</i>         | -1.26 | 3.82   | 66.22  | 4.04E-16 | 3.56E-13 |
| ENSMUSG000000042686.5   | <i>Jph1</i>          | -0.87 | 6.79   | 64.77  | 8.41E-16 | 7.04E-13 |
| ENSMUSG000000038473.14  | <i>Nos1ap</i>        | -0.56 | 7.66   | 63.69  | 1.45E-15 | 1.18E-12 |
| ENSMUSG000000004328.15  | <i>Hif3a</i>         | -0.93 | 4.42   | 62.86  | 2.22E-15 | 1.77E-12 |
| ENSMUSG0000000091722.1  | <i>Siah3</i>         | -0.77 | 7.29   | 62.41  | 2.79E-15 | 2.20E-12 |
| ENSMUSG000000055799.13  | <i>Tcf7l1</i>        | -0.82 | 8.08   | 62.29  | 2.96E-15 | 2.30E-12 |
| ENSMUSG000000027560.4   | <i>Dok5</i>          | -1.01 | 6.06   | 62.13  | 3.21E-15 | 2.45E-12 |
| ENSMUSG000000038855.10  | <i>Itpkb</i>         | -1.27 | 4.16   | 61.75  | 3.90E-15 | 2.86E-12 |
| ENSMUSG000000028437.14  | <i>Ubap1</i>         | -0.68 | 5.82   | 61.65  | 4.11E-15 | 2.96E-12 |
| ENSMUSG0000000029769.16 | <i>Ccdc136</i>       | -0.81 | 6.41   | 61.14  | 5.32E-15 | 3.78E-12 |
| ENSMUSG000000004562.16  | <i>Arhgef40</i>      | -0.79 | 5.23   | 60.40  | 7.76E-15 | 5.30E-12 |
| ENSMUSG000000031109.16  | <i>Enox2</i>         | -0.63 | 6.56   | 60.08  | 9.13E-15 | 6.15E-12 |
| ENSMUSG000000035967.15  | <i>Ints6l</i>        | -0.80 | 5.23   | 59.96  | 9.69E-15 | 6.45E-12 |
| ENSMUSG000000002688.8   | <i>Prkd1</i>         | -0.71 | 7.67   | 59.41  | 1.28E-14 | 8.41E-12 |
| ENSMUSG0000000028456.18 | <i>Unc13b</i>        | -0.65 | 7.09   | 58.87  | 1.68E-14 | 1.08E-11 |
| ENSMUSG000000021027.16  | <i>Ralgapa1</i>      | -0.68 | 7.37   | 57.48  | 3.41E-14 | 2.16E-11 |
| ENSMUSG000000063888.6   | <i>Rpl7l1</i>        | -0.79 | 4.79   | 57.25  | 3.84E-14 | 2.40E-11 |
| ENSMUSG000000031333.7   | <i>Abcb7</i>         | -0.58 | 6.13   | 57.02  | 4.31E-14 | 2.64E-11 |
| ENSMUSG0000000029705.17 | <i>Cux1</i>          | -0.60 | 8.76   | 57.00  | 4.36E-14 | 2.64E-11 |
| ENSMUSG000000063446.4   | <i>Plppr1</i>        | -0.73 | 8.48   | 56.99  | 4.38E-14 | 2.64E-11 |
| ENSMUSG000000022483.16  | <i>Col2a1</i>        | -1.26 | 4.76   | 56.66  | 5.17E-14 | 3.09E-11 |
| ENSMUSG000000021338.17  | <i>Carmil1</i>       | -0.73 | 6.14   | 56.36  | 6.02E-14 | 3.55E-11 |
| ENSMUSG000000023991.16  | <i>Foxp4</i>         | -0.81 | 7.15   | 56.14  | 6.74E-14 | 3.93E-11 |
| ENSMUSG0000000039396.11 | <i>Neil3</i>         | -0.64 | 6.19   | 55.99  | 7.30E-14 | 4.21E-11 |
| ENSMUSG000000021577.14  | <i>Sdha</i>          | -0.67 | 5.51   | 55.85  | 7.83E-14 | 4.47E-11 |
| ENSMUSG000000038070.15  | <i>Cntln</i>         | -0.66 | 6.40   | 55.67  | 8.58E-14 | 4.84E-11 |
| ENSMUSG000000023092.16  | <i>Fhl1</i>          | -0.78 | 6.13   | 55.54  | 9.16E-14 | 5.11E-11 |
| ENSMUSG000000059493.13  | <i>Nhs</i>           | -0.75 | 7.85   | 55.12  | 1.14E-13 | 6.28E-11 |
| ENSMUSG0000000001127.12 | <i>Araf</i>          | -0.65 | 6.21   | 54.87  | 1.29E-13 | 7.03E-11 |
| ENSMUSG000000033502.14  | <i>Cdc14a</i>        | -0.60 | 6.97   | 54.70  | 1.40E-13 | 7.59E-11 |
| ENSMUSG000000039765.15  | <i>Cc2d2a</i>        | -1.02 | 4.54   | 54.35  | 1.68E-13 | 8.98E-11 |
| ENSMUSG000000041220.10  | <i>Elovl6</i>        | -0.64 | 7.27   | 54.21  | 1.80E-13 | 9.43E-11 |
| ENSMUSG000000032220.10  | <i>Myo1e</i>         | -0.98 | 4.52   | 53.82  | 2.20E-13 | 1.14E-10 |
| ENSMUSG0000000041921.16 | <i>Metap1d</i>       | -0.74 | 4.85   | 53.78  | 2.24E-13 | 1.15E-10 |
| ENSMUSG000000003360.14  | <i>Ddx23</i>         | -0.85 | 4.82   | 53.61  | 2.45E-13 | 1.24E-10 |
| ENSMUSG000000035934.16  | <i>Pknox2</i>        | -0.66 | 6.47   | 53.21  | 2.99E-13 | 1.51E-10 |
| ENSMUSG000000029104.15  | <i>Htt</i>           | -0.58 | 6.92   | 53.11  | 3.15E-13 | 1.57E-10 |
| ENSMUSG000000036867.7   | <i>Smad6</i>         | -1.01 | 4.48   | 53.10  | 3.17E-13 | 1.57E-10 |
| ENSMUSG000000035798.14  | <i>Zdhhc17</i>       | -0.62 | 6.24   | 52.90  | 3.52E-13 | 1.72E-10 |
| ENSMUSG000000032263.14  | <i>Bckdhhb</i>       | -0.77 | 5.52   | 52.85  | 3.59E-13 | 1.74E-10 |

|                        |                      |       |      |       |          |          |
|------------------------|----------------------|-------|------|-------|----------|----------|
| ENSMUSG00000020463.15  | <i>Ppp4r3b</i>       | -0.57 | 6.61 | 52.73 | 3.82E-13 | 1.82E-10 |
| ENSMUSG00000035704.17  | <i>Alg8</i>          | -0.98 | 4.13 | 52.17 | 5.09E-13 | 2.40E-10 |
| ENSMUSG00000071064.13  | <i>Zfp827</i>        | -0.71 | 7.47 | 51.53 | 7.07E-13 | 3.30E-10 |
| ENSMUSG00000032397.7   | <i>Tipin</i>         | -0.76 | 5.22 | 51.51 | 7.13E-13 | 3.30E-10 |
| ENSMUSG00000000247.11  | <i>Lhx2</i>          | -0.68 | 7.49 | 51.26 | 8.08E-13 | 3.62E-10 |
| ENSMUSG000000025812.17 | <i>Pard3</i>         | -0.70 | 8.98 | 51.03 | 9.09E-13 | 4.00E-10 |
| ENSMUSG00000063760.9   | <i>Rnf217</i>        | -0.60 | 6.35 | 50.24 | 1.36E-12 | 5.92E-10 |
| ENSMUSG00000026275.13  | <i>Ppp1r7</i>        | -0.67 | 5.17 | 50.01 | 1.53E-12 | 6.60E-10 |
| ENSMUSG00000030350.8   | <i>Prmt8</i>         | -1.24 | 5.42 | 49.84 | 1.67E-12 | 7.10E-10 |
| ENSMUSG00000090626.9   | <i>Tex9</i>          | -0.73 | 5.62 | 49.66 | 1.83E-12 | 7.73E-10 |
| ENSMUSG00000030428.16  | <i>Ttyh1</i>         | -0.73 | 6.79 | 48.69 | 3.00E-12 | 1.26E-09 |
| ENSMUSG00000029334.14  | <i>Prkg2</i>         | -1.33 | 4.10 | 48.44 | 3.41E-12 | 1.41E-09 |
| ENSMUSG00000033149.16  | <i>Phldb2</i>        | -0.73 | 5.56 | 47.72 | 4.91E-12 | 2.02E-09 |
| ENSMUSG00000019951.10  | <i>Uhrf1bp11</i>     | -0.57 | 6.22 | 47.67 | 5.03E-12 | 2.06E-09 |
| ENSMUSG00000032050.17  | <i>Rdx</i>           | -0.53 | 7.38 | 47.09 | 6.78E-12 | 2.75E-09 |
| ENSMUSG00000001911.16  | <i>Nfix</i>          | -0.65 | 8.67 | 46.67 | 8.39E-12 | 3.38E-09 |
| ENSMUSG00000020961.15  | <i>Ston2</i>         | -0.66 | 6.57 | 46.49 | 9.23E-12 | 3.63E-09 |
| ENSMUSG00000006678.6   | <i>Pola1</i>         | -0.66 | 7.50 | 46.49 | 9.20E-12 | 3.63E-09 |
| ENSMUSG00000021669.15  | <i>Col4a3bp</i>      | -0.69 | 5.83 | 46.49 | 9.22E-12 | 3.63E-09 |
| ENSMUSG00000042225.3   | <i>Ammecr1</i>       | -0.67 | 5.38 | 46.33 | 1.00E-11 | 3.87E-09 |
| ENSMUSG000000023411.11 | <i>Nfatc4</i>        | -1.20 | 3.55 | 46.34 | 9.96E-12 | 3.87E-09 |
| ENSMUSG00000026826.13  | <i>Nr4a2</i>         | -0.99 | 4.61 | 45.91 | 1.24E-11 | 4.77E-09 |
| ENSMUSG00000056014.15  | <i>A430033K04Rik</i> | -0.86 | 4.46 | 45.83 | 1.29E-11 | 4.92E-09 |
| ENSMUSG00000028080.16  | <i>Lrba</i>          | -0.58 | 6.08 | 45.49 | 1.53E-11 | 5.76E-09 |
| ENSMUSG00000035021.13  | <i>Baz1a</i>         | -0.62 | 6.26 | 45.27 | 1.71E-11 | 6.40E-09 |
| ENSMUSG00000002870.8   | <i>Mcm2</i>          | -0.82 | 6.13 | 45.09 | 1.88E-11 | 6.94E-09 |
| ENSMUSG00000065954.11  | <i>Tacc1</i>         | -0.58 | 6.62 | 45.01 | 1.96E-11 | 7.17E-09 |
| ENSMUSG00000031684.11  | <i>Slc10a7</i>       | -0.54 | 6.73 | 44.85 | 2.13E-11 | 7.64E-09 |
| ENSMUSG00000097023.8   | <i>Mir9-3hg</i>      | -0.55 | 8.76 | 44.85 | 2.13E-11 | 7.64E-09 |
| ENSMUSG000000053519.15 | <i>Kcnip1</i>        | -0.88 | 6.49 | 44.72 | 2.27E-11 | 8.08E-09 |
| ENSMUSG00000021938.11  | <i>Pspc1</i>         | -0.55 | 7.30 | 44.31 | 2.81E-11 | 9.92E-09 |
| ENSMUSG00000064105.12  | <i>Cnnm2</i>         | -0.89 | 4.04 | 44.02 | 3.25E-11 | 1.13E-08 |
| ENSMUSG00000070509.15  | <i>Rgma</i>          | -0.71 | 6.67 | 44.00 | 3.29E-11 | 1.14E-08 |
| ENSMUSG00000026235.14  | <i>Epha4</i>         | -0.53 | 9.12 | 43.40 | 4.47E-11 | 1.53E-08 |
| ENSMUSG000000029086.15 | <i>Prom1</i>         | -0.67 | 6.65 | 43.29 | 4.71E-11 | 1.58E-08 |
| ENSMUSG00000033610.15  | <i>Pank1</i>         | -0.72 | 5.12 | 42.85 | 5.90E-11 | 1.95E-08 |
| ENSMUSG00000055471.6   | <i>Alk</i>           | -0.97 | 5.60 | 42.81 | 6.02E-11 | 1.98E-08 |
| ENSMUSG00000059208.14  | <i>Hnrnpm</i>        | -0.49 | 7.96 | 42.80 | 6.07E-11 | 1.98E-08 |
| ENSMUSG00000048661.14  | <i>Lemd3</i>         | -0.50 | 6.28 | 42.76 | 6.18E-11 | 2.00E-08 |
| ENSMUSG00000022641.15  | <i>Bbx</i>           | -0.55 | 8.18 | 42.52 | 6.99E-11 | 2.24E-08 |
| ENSMUSG00000036377.18  | <i>C530008M17Rik</i> | -0.53 | 8.76 | 42.49 | 7.10E-11 | 2.26E-08 |
| ENSMUSG00000038119.15  | <i>Cdon</i>          | -0.75 | 9.54 | 42.23 | 8.09E-11 | 2.55E-08 |
| ENSMUSG00000039470.15  | <i>Zdhhc2</i>        | -0.94 | 4.47 | 41.89 | 9.66E-11 | 3.00E-08 |
| ENSMUSG00000039968.9   | <i>Rsbn1l</i>        | -0.56 | 5.89 | 41.58 | 1.13E-10 | 3.50E-08 |
| ENSMUSG00000028514.15  | <i>Usp24</i>         | -0.50 | 7.07 | 41.37 | 1.26E-10 | 3.87E-08 |
| ENSMUSG00000042507.15  | <i>Elmsan1</i>       | -0.71 | 5.47 | 41.08 | 1.46E-10 | 4.46E-08 |
| ENSMUSG00000025810.9   | <i>Nrp1</i>          | -0.72 | 7.38 | 40.82 | 1.67E-10 | 5.07E-08 |
| ENSMUSG00000032498.9   | <i>Mlh1</i>          | -0.76 | 4.74 | 40.72 | 1.76E-10 | 5.30E-08 |
| ENSMUSG00000035227.7   | <i>Spcs2</i>         | -0.72 | 4.84 | 40.58 | 1.89E-10 | 5.67E-08 |
| ENSMUSG00000017390.15  | <i>Aldoc</i>         | -0.79 | 4.55 | 40.52 | 1.95E-10 | 5.81E-08 |
| ENSMUSG00000031665.7   | <i>Sall1</i>         | -0.76 | 6.67 | 40.37 | 2.10E-10 | 6.23E-08 |
| ENSMUSG00000024975.12  | <i>Pdcd4</i>         | -0.52 | 6.94 | 40.11 | 2.40E-10 | 7.07E-08 |
| ENSMUSG00000039089.15  | <i>L3mbtl3</i>       | -0.59 | 6.00 | 39.95 | 2.60E-10 | 7.59E-08 |
| ENSMUSG00000022636.13  | <i>Alcam</i>         | -0.69 | 8.68 | 39.46 | 3.35E-10 | 9.66E-08 |
| ENSMUSG00000032009.8   | <i>Sesn3</i>         | -0.65 | 5.90 | 39.34 | 3.56E-10 | 1.02E-07 |
| ENSMUSG00000052812.5   | <i>Atad2b</i>        | -0.53 | 7.37 | 39.26 | 3.71E-10 | 1.05E-07 |
| ENSMUSG00000036298.10  | <i>Slc2a13</i>       | -0.73 | 6.81 | 39.16 | 3.90E-10 | 1.10E-07 |
| ENSMUSG00000025103.8   | <i>Btbd1</i>         | -0.52 | 5.92 | 39.10 | 4.02E-10 | 1.12E-07 |
| ENSMUSG000000054920.12 | <i>Klhl5</i>         | -0.58 | 6.03 | 39.11 | 4.01E-10 | 1.12E-07 |
| ENSMUSG00000046961.7   | <i>Gpr156</i>        | -0.97 | 4.47 | 38.99 | 4.27E-10 | 1.18E-07 |
| ENSMUSG00000035234.18  | <i>Abraxas1</i>      | -1.05 | 3.50 | 38.92 | 4.41E-10 | 1.21E-07 |
| ENSMUSG00000037957.14  | <i>Wdr20</i>         | -0.48 | 6.24 | 38.72 | 4.90E-10 | 1.34E-07 |
| ENSMUSG00000053007.9   | <i>Creb5</i>         | -0.61 | 9.82 | 38.56 | 5.32E-10 | 1.44E-07 |
| ENSMUSG00000037995.15  | <i>Igsf9</i>         | -0.62 | 5.40 | 38.56 | 5.32E-10 | 1.44E-07 |
| ENSMUSG00000026220.6   | <i>Slc16a14</i>      | -1.07 | 3.87 | 38.43 | 5.69E-10 | 1.52E-07 |
| ENSMUSG00000017548.15  | <i>Suz12</i>         | -0.56 | 7.08 | 38.37 | 5.84E-10 | 1.56E-07 |
| ENSMUSG00000058325.6   | <i>Dock1</i>         | -0.61 | 7.35 | 38.23 | 6.29E-10 | 1.67E-07 |
| ENSMUSG00000028517.8   | <i>Plpp3</i>         | -0.58 | 7.60 | 38.02 | 7.02E-10 | 1.83E-07 |
| ENSMUSG00000033720.12  | <i>Sfxn5</i>         | -0.67 | 6.57 | 37.86 | 7.62E-10 | 1.98E-07 |
| ENSMUSG00000087259.7   | <i>2610035D17Rik</i> | -0.62 | 8.54 | 37.05 | 1.15E-09 | 2.89E-07 |
| ENSMUSG00000070643.11  | <i>Sox13</i>         | -1.06 | 4.46 | 37.05 | 1.15E-09 | 2.89E-07 |
| ENSMUSG00000033732.10  | <i>Sf3b3</i>         | -0.49 | 6.82 | 36.83 | 1.29E-09 | 3.19E-07 |

|                        |                      |       |       |       |          |          |
|------------------------|----------------------|-------|-------|-------|----------|----------|
| ENSMUSG00000025925.14  | <i>Terf1</i>         | -0.61 | 5.50  | 36.81 | 1.31E-09 | 3.21E-07 |
| ENSMUSG00000021375.9   | <i>Kif13a</i>        | -0.60 | 6.03  | 36.48 | 1.54E-09 | 3.73E-07 |
| ENSMUSG00000017978.18  | <i>Cadps2</i>        | -0.60 | 5.31  | 36.44 | 1.57E-09 | 3.77E-07 |
| ENSMUSG00000033420.12  | <i>Antxr1</i>        | -0.62 | 5.44  | 36.44 | 1.57E-09 | 3.77E-07 |
| ENSMUSG00000021957.6   | <i>Tkt</i>           | -0.48 | 6.14  | 36.40 | 1.60E-09 | 3.82E-07 |
| ENSMUSG00000047454.12  | <i>Gphn</i>          | -0.53 | 7.52  | 36.12 | 1.85E-09 | 4.39E-07 |
| ENSMUSG00000016386.15  | <i>Mpped2</i>        | -0.85 | 9.96  | 36.08 | 1.89E-09 | 4.46E-07 |
| ENSMUSG00000038280.12  | <i>Ostm1</i>         | -0.48 | 7.05  | 35.75 | 2.24E-09 | 5.27E-07 |
| ENSMUSG00000027203.15  | <i>Dut</i>           | -0.63 | 4.94  | 35.74 | 2.26E-09 | 5.28E-07 |
| ENSMUSG00000030022.14  | <i>Adamts9</i>       | -1.46 | 4.80  | 35.51 | 2.54E-09 | 5.85E-07 |
| ENSMUSG00000019889.10  | <i>Ptprk</i>         | -0.55 | 7.95  | 35.41 | 2.66E-09 | 6.09E-07 |
| ENSMUSG00000034109.15  | <i>Golim4</i>        | -0.48 | 6.66  | 35.21 | 2.95E-09 | 6.70E-07 |
| ENSMUSG00000038526.14  | <i>Car14</i>         | -1.98 | 2.51  | 35.08 | 3.16E-09 | 7.14E-07 |
| ENSMUSG00000052613.16  | <i>Pcdh15</i>        | -0.86 | 6.16  | 34.84 | 3.58E-09 | 8.01E-07 |
| ENSMUSG00000028444.17  | <i>Cntfr</i>         | -0.79 | 6.15  | 34.60 | 4.04E-09 | 9.00E-07 |
| ENSMUSG00000041997.16  | <i>Tlk1</i>          | -0.42 | 7.27  | 34.55 | 4.15E-09 | 9.20E-07 |
| ENSMUSG00000029563.16  | <i>Foxp2</i>         | -0.61 | 8.44  | 34.47 | 4.33E-09 | 9.49E-07 |
| ENSMUSG00000061315.14  | <i>Naca</i>          | -0.52 | 5.77  | 34.44 | 4.39E-09 | 9.58E-07 |
| ENSMUSG00000026614.6   | <i>Slc30a10</i>      | -0.69 | 5.91  | 34.21 | 4.96E-09 | 1.07E-06 |
| ENSMUSG00000031290.14  | <i>Lrch2</i>         | -0.60 | 6.51  | 33.79 | 6.14E-09 | 1.30E-06 |
| ENSMUSG00000036768.6   | <i>Kif15</i>         | -0.57 | 6.88  | 33.64 | 6.63E-09 | 1.40E-06 |
| ENSMUSG00000006930.15  | <i>Hap1</i>          | -0.89 | 4.25  | 33.63 | 6.67E-09 | 1.40E-06 |
| ENSMUSG00000031273.16  | <i>Col4a6</i>        | -1.02 | 3.61  | 33.61 | 6.73E-09 | 1.41E-06 |
| ENSMUSG00000039384.8   | <i>Dusp10</i>        | -0.82 | 4.29  | 33.57 | 6.87E-09 | 1.43E-06 |
| ENSMUSG00000031990.15  | <i>Jam3</i>          | -0.53 | 6.32  | 33.51 | 7.09E-09 | 1.46E-06 |
| ENSMUSG00000051022.7   | <i>Hs3st1</i>        | -0.66 | 5.24  | 33.48 | 7.21E-09 | 1.48E-06 |
| ENSMUSG00000029782.19  | <i>Tmem209</i>       | -0.75 | 4.51  | 33.40 | 7.52E-09 | 1.54E-06 |
| ENSMUSG00000045179.9   | <i>Sox3</i>          | -0.80 | 4.96  | 33.29 | 7.93E-09 | 1.61E-06 |
| ENSMUSG00000026987.16  | <i>Baz2b</i>         | -0.46 | 9.14  | 33.20 | 8.33E-09 | 1.68E-06 |
| ENSMUSG00000052848.7   | <i>C130026L21Rik</i> | -1.20 | 2.88  | 33.11 | 8.72E-09 | 1.75E-06 |
| ENSMUSG00000025026.14  | <i>Add3</i>          | -0.45 | 6.15  | 32.85 | 9.96E-09 | 2.00E-06 |
| ENSMUSG00000055296.14  | <i>Tmem245</i>       | -0.49 | 6.59  | 32.57 | 1.15E-08 | 2.28E-06 |
| ENSMUSG00000037846.18  | <i>Rtkn2</i>         | -0.68 | 5.18  | 32.46 | 1.21E-08 | 2.39E-06 |
| ENSMUSG00000032040.15  | <i>Dcps</i>          | -0.96 | 3.88  | 32.46 | 1.22E-08 | 2.39E-06 |
| ENSMUSG00000020963.15  | <i>Tshr</i>          | -0.85 | 4.68  | 32.36 | 1.28E-08 | 2.50E-06 |
| ENSMUSG00000034573.14  | <i>Ptpn13</i>        | -0.57 | 5.56  | 32.27 | 1.34E-08 | 2.60E-06 |
| ENSMUSG00000020176.17  | <i>Grb10</i>         | -0.51 | 8.59  | 32.22 | 1.37E-08 | 2.64E-06 |
| ENSMUSG00000022129.3   | <i>Dct</i>           | -1.68 | 3.66  | 32.17 | 1.41E-08 | 2.70E-06 |
| ENSMUSG00000016028.9   | <i>Celsr1</i>        | -0.43 | 8.00  | 32.05 | 1.50E-08 | 2.85E-06 |
| ENSMUSG00000025609.15  | <i>Mkln1</i>         | -0.44 | 7.11  | 31.98 | 1.56E-08 | 2.95E-06 |
| ENSMUSG00000055024.12  | <i>Ep300</i>         | -0.43 | 7.16  | 31.74 | 1.76E-08 | 3.28E-06 |
| ENSMUSG00000054453.11  | <i>Sytl5</i>         | -0.89 | 4.17  | 31.56 | 1.93E-08 | 3.59E-06 |
| ENSMUSG00000032249.14  | <i>Anp32a</i>        | -0.43 | 7.37  | 31.53 | 1.96E-08 | 3.63E-06 |
| ENSMUSG00000026556.15  | <i>Vangl2</i>        | -0.45 | 7.44  | 31.48 | 2.01E-08 | 3.72E-06 |
| ENSMUSG00000029179.14  | <i>Zcchc4</i>        | -0.64 | 4.76  | 31.45 | 2.04E-08 | 3.75E-06 |
| ENSMUSG00000073557.11  | <i>Ppp1r12b</i>      | -0.49 | 6.89  | 31.37 | 2.13E-08 | 3.89E-06 |
| ENSMUSG00000034402.3   | <i>Kcnh5</i>         | -0.72 | 6.07  | 31.25 | 2.27E-08 | 4.11E-06 |
| ENSMUSG00000027650.12  | <i>Tti1</i>          | -0.80 | 4.51  | 31.17 | 2.37E-08 | 4.25E-06 |
| ENSMUSG00000051910.13  | <i>Sox6</i>          | -0.54 | 10.09 | 31.11 | 2.43E-08 | 4.35E-06 |
| ENSMUSG00000028664.14  | <i>Ephb2</i>         | -0.42 | 8.16  | 31.06 | 2.50E-08 | 4.46E-06 |
| ENSMUSG00000050271.12  | <i>Prag1</i>         | -0.85 | 5.26  | 30.67 | 3.05E-08 | 5.41E-06 |
| ENSMUSG00000022463.7   | <i>Srebf2</i>        | -0.42 | 7.06  | 30.62 | 3.13E-08 | 5.53E-06 |
| ENSMUSG00000016984.7   | <i>Etaa1</i>         | -0.69 | 4.61  | 30.32 | 3.65E-08 | 6.39E-06 |
| ENSMUSG00000020955.9   | <i>Ap4s1</i>         | -0.60 | 4.60  | 30.30 | 3.71E-08 | 6.46E-06 |
| ENSMUSG00000022203.6   | <i>Efs</i>           | -0.71 | 4.18  | 29.99 | 4.34E-08 | 7.48E-06 |
| ENSMUSG00000027253.15  | <i>Lrp4</i>          | -0.51 | 6.49  | 29.68 | 5.10E-08 | 8.67E-06 |
| ENSMUSG00000057604.9   | <i>Lmcd1</i>         | -1.11 | 3.14  | 29.47 | 5.67E-08 | 9.58E-06 |
| ENSMUSG00000000085.16  | <i>Scmh1</i>         | -0.42 | 6.98  | 29.45 | 5.74E-08 | 9.68E-06 |
| ENSMUSG000000034285.15 | <i>Nipsnap1</i>      | -0.68 | 4.80  | 29.38 | 5.95E-08 | 1.00E-05 |
| ENSMUSG00000098318.7   | <i>Lockd</i>         | -0.51 | 5.91  | 29.30 | 6.19E-08 | 1.03E-05 |
| ENSMUSG00000059401.13  | <i>Maml1</i>         | -0.66 | 6.59  | 29.29 | 6.22E-08 | 1.03E-05 |
| ENSMUSG00000079056.12  | <i>Kcnip3</i>        | -0.80 | 5.09  | 29.28 | 6.26E-08 | 1.04E-05 |
| ENSMUSG00000037286.15  | <i>Stag1</i>         | -0.39 | 8.43  | 29.20 | 6.52E-08 | 1.07E-05 |
| ENSMUSG00000060126.14  | <i>Tpt1</i>          | -0.39 | 8.17  | 29.14 | 6.72E-08 | 1.09E-05 |
| ENSMUSG00000021130.8   | <i>Galnt16</i>       | -0.55 | 5.97  | 29.15 | 6.70E-08 | 1.09E-05 |
| ENSMUSG00000022489.5   | <i>Pde1b</i>         | -0.53 | 5.81  | 29.14 | 6.75E-08 | 1.09E-05 |
| ENSMUSG00000026187.8   | <i>Xrcc5</i>         | -0.46 | 5.56  | 29.10 | 6.86E-08 | 1.11E-05 |
| ENSMUSG00000021767.16  | <i>Kat6b</i>         | -0.47 | 9.33  | 29.10 | 6.87E-08 | 1.11E-05 |
| ENSMUSG00000021981.9   | <i>Cab39l</i>        | -0.67 | 4.46  | 28.99 | 7.29E-08 | 1.16E-05 |
| ENSMUSG0000005882.18   | <i>Uqcc1</i>         | -0.51 | 5.45  | 28.94 | 7.45E-08 | 1.18E-05 |
| ENSMUSG00000015224.10  | <i>Cyp2j9</i>        | -1.59 | 1.93  | 28.88 | 7.70E-08 | 1.21E-05 |
| ENSMUSG00000097063.3   | <i>Pantr2</i>        | -0.71 | 4.62  | 28.82 | 7.96E-08 | 1.25E-05 |

|                        |                      |       |      |       |          |          |
|------------------------|----------------------|-------|------|-------|----------|----------|
| ENSMUSG00000027428.9   | <i>Rbbp9</i>         | -0.84 | 3.56 | 28.71 | 8.42E-08 | 1.32E-05 |
| ENSMUSG00000046591.10  | <i>Ticrr</i>         | -0.65 | 5.43 | 28.70 | 8.46E-08 | 1.32E-05 |
| ENSMUSG00000040204.6   | <i>Pclaf</i>         | -0.64 | 5.06 | 28.69 | 8.49E-08 | 1.32E-05 |
| ENSMUSG00000024400.15  | <i>Wdr33</i>         | -0.37 | 7.66 | 28.67 | 8.58E-08 | 1.33E-05 |
| ENSMUSG00000030846.15  | <i>Tial1</i>         | -0.45 | 6.36 | 28.58 | 8.97E-08 | 1.37E-05 |
| ENSMUSG00000032193.9   | <i>Ldlr</i>          | -0.55 | 5.19 | 28.52 | 9.26E-08 | 1.41E-05 |
| ENSMUSG00000002996.17  | <i>Hbp1</i>          | -0.57 | 5.54 | 28.49 | 9.41E-08 | 1.43E-05 |
| ENSMUSG00000086370.8   | <i>Ftx</i>           | -0.55 | 5.53 | 28.46 | 9.58E-08 | 1.45E-05 |
| ENSMUSG00000058881.12  | <i>Zfp516</i>        | -0.47 | 7.10 | 28.41 | 9.82E-08 | 1.48E-05 |
| ENSMUSG00000022802.2   | <i>Lmln</i>          | -0.64 | 4.58 | 28.38 | 9.99E-08 | 1.50E-05 |
| ENSMUSG00000075254.11  | <i>Heg1</i>          | -0.50 | 8.12 | 28.26 | 1.06E-07 | 1.59E-05 |
| ENSMUSG00000087095.2   | <i>Emx2os</i>        | -0.76 | 5.40 | 28.08 | 1.17E-07 | 1.73E-05 |
| ENSMUSG00000021782.14  | <i>Dlg5</i>          | -0.42 | 6.57 | 28.04 | 1.19E-07 | 1.75E-05 |
| ENSMUSG00000047045.17  | <i>Tmem164</i>       | -0.47 | 6.94 | 28.03 | 1.19E-07 | 1.76E-05 |
| ENSMUSG00000015189.12  | <i>Casd1</i>         | -0.54 | 5.38 | 27.94 | 1.25E-07 | 1.84E-05 |
| ENSMUSG000000061838.7  | <i>Suclg2</i>        | -0.67 | 5.55 | 27.93 | 1.26E-07 | 1.84E-05 |
| ENSMUSG00000063681.14  | <i>Crb1</i>          | -1.06 | 3.77 | 27.91 | 1.27E-07 | 1.85E-05 |
| ENSMUSG00000045962.16  | <i>Wnk1</i>          | -0.38 | 8.03 | 27.79 | 1.35E-07 | 1.95E-05 |
| ENSMUSG00000069806.5   | <i>Cacng7</i>        | -0.46 | 5.95 | 27.72 | 1.40E-07 | 2.02E-05 |
| ENSMUSG00000019907.10  | <i>Ppp1r12a</i>      | -0.40 | 7.44 | 27.67 | 1.44E-07 | 2.07E-05 |
| ENSMUSG00000019803.11  | <i>Nr2e1</i>         | -0.58 | 5.77 | 27.51 | 1.57E-07 | 2.24E-05 |
| ENSMUSG00000029432.12  | <i>Nipsnap2</i>      | -0.62 | 4.62 | 27.49 | 1.58E-07 | 2.26E-05 |
| ENSMUSG00000039753.16  | <i>Fbxl5</i>         | -0.44 | 6.22 | 27.45 | 1.61E-07 | 2.29E-05 |
| ENSMUSG00000047712.8   | <i>Ust</i>           | -0.62 | 6.47 | 27.37 | 1.68E-07 | 2.39E-05 |
| ENSMUSG00000057337.13  | <i>Chst3</i>         | -0.66 | 4.97 | 27.26 | 1.78E-07 | 2.51E-05 |
| ENSMUSG00000037486.18  | <i>Asx2</i>          | -0.42 | 6.84 | 27.26 | 1.78E-07 | 2.51E-05 |
| ENSMUSG00000001435.15  | <i>Col18a1</i>       | -0.81 | 5.50 | 27.25 | 1.79E-07 | 2.51E-05 |
| ENSMUSG00000057147.13  | <i>Dph6</i>          | -0.43 | 6.13 | 27.22 | 1.81E-07 | 2.55E-05 |
| ENSMUSG00000027332.11  | <i>Ivd</i>           | -0.67 | 4.33 | 27.20 | 1.83E-07 | 2.56E-05 |
| ENSMUSG00000019982.15  | <i>Myb</i>           | -0.85 | 4.05 | 27.17 | 1.86E-07 | 2.59E-05 |
| ENSMUSG00000026869.12  | <i>Psmc5</i>         | -0.64 | 4.80 | 27.15 | 1.88E-07 | 2.61E-05 |
| ENSMUSG00000001415.10  | <i>Smg5</i>          | -0.51 | 5.49 | 26.99 | 2.04E-07 | 2.81E-05 |
| ENSMUSG00000048186.14  | <i>Bend7</i>         | -0.89 | 3.46 | 26.92 | 2.12E-07 | 2.92E-05 |
| ENSMUSG00000022687.12  | <i>Boc</i>           | -0.46 | 8.06 | 26.81 | 2.25E-07 | 3.07E-05 |
| ENSMUSG00000042535.8   | <i>Gtpbp1</i>        | -0.52 | 5.59 | 26.80 | 2.26E-07 | 3.07E-05 |
| ENSMUSG00000031790.8   | <i>Mmp15</i>         | -0.71 | 4.58 | 26.80 | 2.26E-07 | 3.07E-05 |
| ENSMUSG00000049800.13  | <i>Sertad2</i>       | -0.46 | 5.99 | 26.74 | 2.32E-07 | 3.14E-05 |
| ENSMUSG00000062328.7   | <i>Rpl17</i>         | -0.63 | 5.65 | 26.68 | 2.40E-07 | 3.23E-05 |
| ENSMUSG00000057841.5   | <i>Rpl32</i>         | -0.53 | 6.39 | 26.53 | 2.59E-07 | 3.47E-05 |
| ENSMUSG00000052957.7   | <i>Gas1</i>          | -0.82 | 5.34 | 26.48 | 2.66E-07 | 3.56E-05 |
| ENSMUSG00000085438.1   | <i>1700020114Rik</i> | -0.42 | 6.87 | 26.24 | 3.01E-07 | 4.00E-05 |
| ENSMUSG00000031198.4   | <i>Fundc2</i>        | -1.12 | 2.60 | 25.83 | 3.73E-07 | 4.91E-05 |
| ENSMUSG00000075334.2   | <i>Rprm</i>          | -0.68 | 4.65 | 25.77 | 3.84E-07 | 5.04E-05 |
| ENSMUSG000000031700.11 | <i>Gpt2</i>          | -0.58 | 4.49 | 25.72 | 3.95E-07 | 5.16E-05 |
| ENSMUSG00000003534.17  | <i>Ddr1</i>          | -0.50 | 6.36 | 25.65 | 4.08E-07 | 5.33E-05 |
| ENSMUSG00000021556.11  | <i>Golm1</i>         | -0.47 | 6.28 | 25.58 | 4.25E-07 | 5.52E-05 |
| ENSMUSG00000006403.13  | <i>Adamts4</i>       | -1.34 | 2.07 | 25.58 | 4.24E-07 | 5.52E-05 |
| ENSMUSG00000028909.17  | <i>Ptpru</i>         | -0.60 | 6.26 | 25.45 | 4.53E-07 | 5.86E-05 |
| ENSMUSG00000074682.4   | <i>Zcchc3</i>        | -1.02 | 3.62 | 25.40 | 4.66E-07 | 6.00E-05 |
| ENSMUSG00000040729.7   | <i>Cep126</i>        | -0.73 | 3.92 | 25.37 | 4.72E-07 | 6.07E-05 |
| ENSMUSG00000030203.17  | <i>Dusp16</i>        | -0.53 | 6.23 | 25.33 | 4.83E-07 | 6.18E-05 |
| ENSMUSG00000034252.14  | <i>Senp6</i>         | -0.40 | 7.54 | 25.27 | 4.99E-07 | 6.34E-05 |
| ENSMUSG00000038668.14  | <i>Lpar1</i>         | -0.53 | 6.85 | 25.19 | 5.19E-07 | 6.57E-05 |
| ENSMUSG00000038602.7   | <i>Slc35f1</i>       | -0.46 | 9.60 | 25.15 | 5.30E-07 | 6.70E-05 |
| ENSMUSG00000030465.19  | <i>Psd3</i>          | -0.45 | 7.84 | 25.07 | 5.52E-07 | 6.94E-05 |
| ENSMUSG00000032352.16  | <i>Lrrc1</i>         | -0.49 | 6.97 | 25.08 | 5.51E-07 | 6.94E-05 |
| ENSMUSG00000038034.15  | <i>Igsf8</i>         | -0.48 | 6.04 | 25.06 | 5.57E-07 | 6.98E-05 |
| ENSMUSG00000026749.11  | <i>Nek6</i>          | -0.46 | 6.47 | 25.00 | 5.72E-07 | 7.16E-05 |
| ENSMUSG000000039046.15 | <i>Usp6nl</i>        | -0.43 | 6.76 | 24.94 | 5.90E-07 | 7.37E-05 |
| ENSMUSG00000036478.8   | <i>Btg1</i>          | -0.60 | 4.85 | 24.83 | 6.26E-07 | 7.75E-05 |
| ENSMUSG00000024143.14  | <i>Rhoq</i>          | -0.59 | 4.95 | 24.82 | 6.31E-07 | 7.80E-05 |
| ENSMUSG00000047497.9   | <i>Adamts12</i>      | -1.23 | 2.44 | 24.65 | 6.86E-07 | 8.40E-05 |
| ENSMUSG00000031627.9   | <i>Irf2</i>          | -0.46 | 5.78 | 24.60 | 7.07E-07 | 8.62E-05 |
| ENSMUSG00000030351.5   | <i>Tspan11</i>       | -0.70 | 5.31 | 24.60 | 7.07E-07 | 8.62E-05 |
| ENSMUSG00000025262.8   | <i>Fam120c</i>       | -0.41 | 5.86 | 24.47 | 7.55E-07 | 9.17E-05 |
| ENSMUSG00000020954.16  | <i>Strn3</i>         | -0.35 | 8.21 | 24.38 | 7.93E-07 | 9.62E-05 |
| ENSMUSG00000075592.9   | <i>Nynrin</i>        | -0.50 | 5.12 | 24.35 | 8.04E-07 | 9.73E-05 |
| ENSMUSG000000028013.16 | <i>Ppa2</i>          | -0.54 | 4.71 | 24.31 | 8.20E-07 | 9.88E-05 |
| ENSMUSG00000035168.16  | <i>Tanc1</i>         | -0.45 | 7.46 | 24.28 | 8.35E-07 | 0.000100 |
| ENSMUSG00000061130.12  | <i>Ppm1b</i>         | -0.42 | 6.63 | 24.24 | 8.52E-07 | 0.000102 |
| ENSMUSG00000037111.9   | <i>Setd7</i>         | -0.38 | 6.11 | 24.20 | 8.67E-07 | 0.000103 |
| ENSMUSG00000019792.8   | <i>Trmt11</i>        | -0.45 | 5.67 | 24.19 | 8.71E-07 | 0.000104 |



|                       |                      |       |       |       |          |          |
|-----------------------|----------------------|-------|-------|-------|----------|----------|
| ENSMUSG00000068040.10 | <i>Tm9sf4</i>        | -0.47 | 5.31  | 24.12 | 9.06E-07 | 0.000108 |
| ENSMUSG00000054752.16 | <i>Fsd11</i>         | -0.38 | 7.63  | 23.95 | 9.89E-07 | 0.000116 |
| ENSMUSG00000041879.13 | <i>Ipo9</i>          | -0.36 | 7.29  | 23.94 | 9.92E-07 | 0.000116 |
| ENSMUSG00000063810.7  | <i>Alms1</i>         | -0.43 | 6.90  | 23.88 | 1.03E-06 | 0.000120 |
| ENSMUSG00000027210.20 | <i>Meis2</i>         | -0.43 | 10.69 | 23.83 | 1.05E-06 | 0.000123 |
| ENSMUSG00000049916.10 | <i>2610318N02Rik</i> | -0.80 | 4.27  | 23.78 | 1.08E-06 | 0.000125 |
| ENSMUSG00000062184.11 | <i>Hs6st2</i>        | -0.50 | 8.02  | 23.72 | 1.12E-06 | 0.000129 |
| ENSMUSG00000032030.16 | <i>Cul5</i>          | -0.38 | 6.59  | 23.71 | 1.12E-06 | 0.000129 |
| ENSMUSG00000033059.7  | <i>Pygb</i>          | -0.44 | 5.76  | 23.70 | 1.13E-06 | 0.000130 |
| ENSMUSG00000021952.15 | <i>Xpo4</i>          | -0.45 | 5.82  | 23.65 | 1.16E-06 | 0.000133 |
| ENSMUSG00000037860.15 | <i>Aim2</i>          | -0.54 | 6.54  | 23.55 | 1.22E-06 | 0.000139 |
| ENSMUSG00000035623.14 | <i>Rsf1</i>          | -0.38 | 7.47  | 23.53 | 1.23E-06 | 0.000141 |
| ENSMUSG00000050310.8  | <i>Rictor</i>        | -0.40 | 6.81  | 23.43 | 1.30E-06 | 0.000148 |
| ENSMUSG00000060206.11 | <i>Zfp462</i>        | -0.42 | 9.89  | 23.38 | 1.33E-06 | 0.000151 |
| ENSMUSG00000026842.16 | <i>Abl1</i>          | -0.37 | 7.04  | 23.31 | 1.38E-06 | 0.000157 |
| ENSMUSG00000022186.14 | <i>Oxct1</i>         | -0.37 | 6.63  | 23.26 | 1.42E-06 | 0.000160 |
| ENSMUSG00000026923.15 | <i>Notch1</i>        | -0.43 | 7.03  | 23.23 | 1.44E-06 | 0.000162 |
| ENSMUSG00000021377.14 | <i>Dek</i>           | -0.40 | 7.27  | 23.22 | 1.45E-06 | 0.000162 |
| ENSMUSG00000027004.3  | <i>Frzb</i>          | -2.54 | 0.89  | 23.18 | 1.47E-06 | 0.000165 |
| ENSMUSG00000024985.18 | <i>Tcf7l2</i>        | -0.47 | 6.35  | 23.16 | 1.49E-06 | 0.000167 |
| ENSMUSG00000051295.7  | <i>9630028B13Rik</i> | -0.88 | 3.33  | 23.11 | 1.53E-06 | 0.000171 |
| ENSMUSG00000031340.8  | <i>Gabre</i>         | -1.27 | 2.29  | 23.10 | 1.54E-06 | 0.000171 |
| ENSMUSG00000024998.17 | <i>Plce1</i>         | -0.53 | 7.28  | 23.05 | 1.58E-06 | 0.000174 |
| ENSMUSG00000060862.10 | <i>Zbtb40</i>        | -0.64 | 4.95  | 23.04 | 1.58E-06 | 0.000175 |
| ENSMUSG00000069769.13 | <i>Msi2</i>          | -0.43 | 9.98  | 23.04 | 1.59E-06 | 0.000175 |
| ENSMUSG00000037395.15 | <i>Rcor3</i>         | -0.50 | 5.02  | 23.03 | 1.60E-06 | 0.000176 |
| ENSMUSG00000030657.11 | <i>Xylt1</i>         | -0.44 | 8.08  | 22.93 | 1.68E-06 | 0.000184 |
| ENSMUSG00000026893.4  | <i>Gca</i>           | -0.69 | 3.94  | 22.85 | 1.75E-06 | 0.000191 |
| ENSMUSG00000068855.3  | <i>Hist2h2ac</i>     | -0.56 | 6.37  | 22.80 | 1.80E-06 | 0.000195 |
| ENSMUSG00000067194.6  | <i>Eif1ax</i>        | -0.40 | 5.87  | 22.74 | 1.85E-06 | 0.000200 |
| ENSMUSG00000021224.15 | <i>Numb</i>          | -0.35 | 6.62  | 22.69 | 1.90E-06 | 0.000204 |
| ENSMUSG00000039323.18 | <i>Igf1bp2</i>       | -0.44 | 6.23  | 22.65 | 1.94E-06 | 0.000209 |
| ENSMUSG00000054256.11 | <i>Msi1</i>          | -0.38 | 7.69  | 22.58 | 2.02E-06 | 0.000216 |
| ENSMUSG00000048078.16 | <i>Tenm4</i>         | -0.42 | 11.19 | 22.56 | 2.03E-06 | 0.000217 |
| ENSMUSG00000048154.16 | <i>Kmt2d</i>         | -0.46 | 7.47  | 22.54 | 2.06E-06 | 0.000219 |
| ENSMUSG00000031922.12 | <i>Cep57</i>         | -0.44 | 5.35  | 22.49 | 2.11E-06 | 0.000223 |
| ENSMUSG00000058571.10 | <i>Gpc6</i>          | -0.43 | 10.43 | 22.35 | 2.27E-06 | 0.000238 |
| ENSMUSG00000021039.9  | <i>Snw1</i>          | -0.45 | 5.38  | 22.29 | 2.34E-06 | 0.000245 |
| ENSMUSG00000049119.14 | <i>Fam110b</i>       | -0.41 | 6.93  | 22.24 | 2.40E-06 | 0.000251 |
| ENSMUSG00000028221.3  | <i>Tmem55a</i>       | -0.38 | 5.98  | 22.22 | 2.43E-06 | 0.000253 |
| ENSMUSG00000024713.15 | <i>Pcsk5</i>         | -0.66 | 5.19  | 22.18 | 2.48E-06 | 0.000258 |
| ENSMUSG00000053483.13 | <i>Usp21</i>         | -0.69 | 4.18  | 22.18 | 2.48E-06 | 0.000258 |
| ENSMUSG00000079487.11 | <i>Med12</i>         | -0.48 | 5.40  | 22.14 | 2.54E-06 | 0.000262 |
| ENSMUSG00000060098.11 | <i>Prmt7</i>         | -0.62 | 4.48  | 22.13 | 2.55E-06 | 0.000263 |
| ENSMUSG00000061607.14 | <i>Mdc1</i>          | -0.38 | 5.82  | 22.11 | 2.58E-06 | 0.000265 |
| ENSMUSG00000025420.13 | <i>Katnal2</i>       | -0.75 | 4.44  | 22.11 | 2.58E-06 | 0.000265 |
| ENSMUSG00000063450.14 | <i>Syne2</i>         | -0.39 | 9.84  | 22.09 | 2.61E-06 | 0.000267 |
| ENSMUSG00000030213.12 | <i>Atf7ip</i>        | -0.35 | 8.15  | 22.00 | 2.73E-06 | 0.000279 |
| ENSMUSG00000032737.13 | <i>Inpp1</i>         | -0.50 | 5.07  | 21.99 | 2.74E-06 | 0.000280 |
| ENSMUSG00000055320.17 | <i>Tead1</i>         | -0.40 | 8.17  | 21.94 | 2.81E-06 | 0.000286 |
| ENSMUSG00000096210.1  | <i>H1f0</i>          | -0.49 | 6.56  | 21.87 | 2.92E-06 | 0.000296 |
| ENSMUSG00000032198.9  | <i>Dock6</i>         | -0.78 | 3.92  | 21.84 | 2.97E-06 | 0.000301 |
| ENSMUSG00000074505.5  | <i>Fat3</i>          | -0.37 | 9.67  | 21.83 | 2.98E-06 | 0.000301 |
| ENSMUSG00000027878.11 | <i>Notch2</i>        | -0.35 | 7.24  | 21.78 | 3.06E-06 | 0.000309 |
| ENSMUSG00000049421.13 | <i>Zfp260</i>        | -0.52 | 5.41  | 21.77 | 3.07E-06 | 0.000309 |
| ENSMUSG00000020528.14 | <i>Prpsap2</i>       | -0.54 | 4.68  | 21.75 | 3.11E-06 | 0.000313 |
| ENSMUSG00000021990.15 | <i>Spata13</i>       | -0.53 | 7.99  | 21.64 | 3.29E-06 | 0.000328 |
| ENSMUSG00000056899.10 | <i>Immp2l</i>        | -0.44 | 6.70  | 21.63 | 3.31E-06 | 0.000329 |
| ENSMUSG00000028675.12 | <i>Pnrc2</i>         | -0.65 | 4.34  | 21.63 | 3.31E-06 | 0.000329 |
| ENSMUSG00000013076.17 | <i>Amotl1</i>        | -0.40 | 6.44  | 21.60 | 3.36E-06 | 0.000333 |
| ENSMUSG00000041846.15 | <i>Ppp4r3a</i>       | -0.38 | 6.96  | 21.60 | 3.37E-06 | 0.000333 |
| ENSMUSG00000051166.10 | <i>Eml5</i>          | -0.40 | 7.88  | 21.54 | 3.47E-06 | 0.000342 |
| ENSMUSG00000069135.11 | <i>Fgfr1op</i>       | -0.47 | 4.97  | 21.43 | 3.67E-06 | 0.000361 |
| ENSMUSG00000022490.6  | <i>Ppp1r1a</i>       | -0.64 | 3.92  | 21.37 | 3.79E-06 | 0.000371 |
| ENSMUSG00000039197.9  | <i>Adk</i>           | -0.43 | 7.27  | 21.34 | 3.85E-06 | 0.000376 |
| ENSMUSG00000046982.10 | <i>Tshz1</i>         | -0.50 | 6.19  | 21.34 | 3.85E-06 | 0.000376 |
| ENSMUSG00000038900.17 | <i>Rpl12</i>         | -0.36 | 6.87  | 21.29 | 3.94E-06 | 0.000384 |
| ENSMUSG00000021431.14 | <i>Snrnp48</i>       | -0.49 | 4.73  | 21.20 | 4.14E-06 | 0.000402 |
| ENSMUSG00000010461.15 | <i>Eya4</i>          | -0.87 | 5.89  | 21.18 | 4.17E-06 | 0.000405 |
| ENSMUSG00000052056.14 | <i>Zfp217</i>        | -0.50 | 4.78  | 21.17 | 4.20E-06 | 0.000407 |
| ENSMUSG00000024827.9  | <i>Gldc</i>          | -0.53 | 5.05  | 21.11 | 4.33E-06 | 0.000419 |
| ENSMUSG00000034341.17 | <i>Wbp2</i>          | -0.83 | 3.56  | 21.08 | 4.40E-06 | 0.000425 |

|                       |                      |       |      |       |          |          |
|-----------------------|----------------------|-------|------|-------|----------|----------|
| ENSMUSG0000000567.5   | <i>Sox9</i>          | -0.44 | 5.86 | 21.00 | 4.60E-06 | 0.000442 |
| ENSMUSG00000034926.3  | <i>Dhcr24</i>        | -0.47 | 5.49 | 20.96 | 4.68E-06 | 0.000449 |
| ENSMUSG00000049804.9  | <i>Armcx4</i>        | -0.40 | 6.02 | 20.91 | 4.82E-06 | 0.000461 |
| ENSMUSG00000055639.16 | <i>Dach1</i>         | -0.63 | 9.72 | 20.86 | 4.95E-06 | 0.000472 |
| ENSMUSG00000040044.11 | <i>Orc3</i>          | -0.45 | 5.46 | 20.85 | 4.97E-06 | 0.000473 |
| ENSMUSG00000028863.13 | <i>Meaf6</i>         | -0.46 | 5.30 | 20.84 | 5.00E-06 | 0.000475 |
| ENSMUSG00000046364.14 | <i>Rpl27a</i>        | -0.51 | 5.01 | 20.81 | 5.07E-06 | 0.000480 |
| ENSMUSG00000022887.8  | <i>Masp1</i>         | -0.39 | 7.36 | 20.80 | 5.11E-06 | 0.000481 |
| ENSMUSG00000025255.18 | <i>Zfhx4</i>         | -0.42 | 7.48 | 20.79 | 5.12E-06 | 0.000481 |
| ENSMUSG00000075232.5  | <i>Amd1</i>          | -0.53 | 4.78 | 20.79 | 5.12E-06 | 0.000481 |
| ENSMUSG00000032727.13 | <i>Mier3</i>         | -0.45 | 5.31 | 20.78 | 5.14E-06 | 0.000482 |
| ENSMUSG00000042129.8  | <i>Rassf4</i>        | -0.76 | 3.72 | 20.73 | 5.30E-06 | 0.000496 |
| ENSMUSG00000024913.16 | <i>Lrp5</i>          | -0.49 | 5.58 | 20.70 | 5.38E-06 | 0.000502 |
| ENSMUSG00000030029.14 | <i>Lrig1</i>         | -0.63 | 5.91 | 20.69 | 5.40E-06 | 0.000503 |
| ENSMUSG00000040481.17 | <i>Bptf</i>          | -0.33 | 7.93 | 20.68 | 5.44E-06 | 0.000506 |
| ENSMUSG00000029128.12 | <i>Rab28</i>         | -0.44 | 6.34 | 20.62 | 5.60E-06 | 0.000520 |
| ENSMUSG00000028532.14 | <i>Cachd1</i>        | -0.54 | 8.54 | 20.61 | 5.63E-06 | 0.000522 |
| ENSMUSG00000074088.6  | <i>Snrnp40</i>       | -0.49 | 5.29 | 20.61 | 5.64E-06 | 0.000522 |
| ENSMUSG00000030541.16 | <i>Idh2</i>          | -0.42 | 5.88 | 20.59 | 5.70E-06 | 0.000526 |
| ENSMUSG00000045294.11 | <i>Insig1</i>        | -0.55 | 4.43 | 20.58 | 5.71E-06 | 0.000527 |
| ENSMUSG00000027508.15 | <i>Pag1</i>          | -0.40 | 6.96 | 20.55 | 5.81E-06 | 0.000533 |
| ENSMUSG00000022899.8  | <i>Slc15a2</i>       | -0.72 | 4.89 | 20.55 | 5.82E-06 | 0.000533 |
| ENSMUSG00000027684.16 | <i>Mecom</i>         | -0.81 | 4.94 | 20.55 | 5.82E-06 | 0.000533 |
| ENSMUSG00000047496.6  | <i>Rnf152</i>        | -0.48 | 5.05 | 20.51 | 5.94E-06 | 0.000542 |
| ENSMUSG00000071856.10 | <i>Mcc</i>           | -0.49 | 5.06 | 20.48 | 6.02E-06 | 0.000547 |
| ENSMUSG00000027496.15 | <i>Aurka</i>         | -0.53 | 4.91 | 20.48 | 6.02E-06 | 0.000547 |
| ENSMUSG00000021745.13 | <i>Ptprg</i>         | -0.36 | 9.27 | 20.39 | 6.30E-06 | 0.000570 |
| ENSMUSG00000028152.10 | <i>Tspan5</i>        | -0.35 | 8.07 | 20.33 | 6.51E-06 | 0.000588 |
| ENSMUSG00000051177.16 | <i>Plcb1</i>         | -0.46 | 9.68 | 20.26 | 6.74E-06 | 0.000607 |
| ENSMUSG0000003038.15  | <i>Hmgn2</i>         | -0.51 | 5.41 | 20.27 | 6.74E-06 | 0.000607 |
| ENSMUSG00000024853.9  | <i>Sf3b2</i>         | -0.43 | 7.41 | 20.26 | 6.77E-06 | 0.000608 |
| ENSMUSG00000034135.15 | <i>Sik3</i>          | -0.33 | 7.00 | 20.23 | 6.86E-06 | 0.000614 |
| ENSMUSG00000024370.16 | <i>Cdc23</i>         | -0.37 | 6.23 | 20.23 | 6.87E-06 | 0.000614 |
| ENSMUSG00000097462.7  | <i>9530026P05Rik</i> | -1.31 | 2.47 | 20.23 | 6.85E-06 | 0.000614 |
| ENSMUSG00000026495.8  | <i>Efcab2</i>        | -0.98 | 2.96 | 20.21 | 6.94E-06 | 0.000619 |
| ENSMUSG00000051950.10 | <i>B3glct</i>        | -0.50 | 5.83 | 20.19 | 7.00E-06 | 0.000624 |
| ENSMUSG00000025241.16 | <i>Fyco1</i>         | -0.52 | 4.53 | 20.11 | 7.29E-06 | 0.000646 |
| ENSMUSG00000019837.8  | <i>Gtf3c6</i>        | -0.58 | 4.37 | 20.08 | 7.44E-06 | 0.000655 |
| ENSMUSG00000033952.14 | <i>Aspm</i>          | -0.39 | 7.45 | 20.05 | 7.56E-06 | 0.000664 |
| ENSMUSG00000021910.15 | <i>Nisch</i>         | -0.36 | 8.15 | 20.04 | 7.60E-06 | 0.000666 |
| ENSMUSG00000047539.9  | <i>Fbxo28</i>        | -0.44 | 5.61 | 20.00 | 7.75E-06 | 0.000677 |
| ENSMUSG00000001138.13 | <i>Cnnm3</i>         | -0.61 | 4.25 | 19.94 | 8.01E-06 | 0.000698 |
| ENSMUSG00000021493.15 | <i>Pdlim7</i>        | -0.67 | 3.93 | 19.93 | 8.04E-06 | 0.000699 |
| ENSMUSG00000021972.14 | <i>Hmbox1</i>        | -0.33 | 7.18 | 19.91 | 8.11E-06 | 0.000703 |
| ENSMUSG00000097589.9  | <i>Dleu2</i>         | -0.36 | 8.38 | 19.91 | 8.12E-06 | 0.000703 |
| ENSMUSG00000074129.13 | <i>Rpl13a</i>        | -0.87 | 2.81 | 19.91 | 8.11E-06 | 0.000703 |
| ENSMUSG00000043969.4  | <i>Emx2</i>          | -0.65 | 4.94 | 19.77 | 8.76E-06 | 0.000753 |
| ENSMUSG00000027933.11 | <i>Ints3</i>         | -0.40 | 5.50 | 19.57 | 9.69E-06 | 0.000827 |
| ENSMUSG00000052146.15 | <i>Rps10</i>         | -0.64 | 4.77 | 19.57 | 9.70E-06 | 0.000827 |
| ENSMUSG0000004233.14  | <i>Wars2</i>         | -0.52 | 4.60 | 19.53 | 9.91E-06 | 0.000843 |
| ENSMUSG00000097917.2  | <i>Gm26839</i>       | -0.88 | 3.26 | 19.47 | 1.02E-05 | 0.000868 |
| ENSMUSG00000031119.4  | <i>Gpc4</i>          | -0.44 | 7.77 | 19.42 | 1.05E-05 | 0.000889 |
| ENSMUSG00000031521.5  | <i>Aga</i>           | -1.88 | 1.00 | 19.40 | 1.06E-05 | 0.000895 |
| ENSMUSG00000022816.11 | <i>Fstl1</i>         | -0.54 | 5.48 | 19.33 | 1.10E-05 | 0.000922 |
| ENSMUSG0000000628.10  | <i>Hk2</i>           | -0.50 | 4.91 | 19.26 | 1.14E-05 | 0.000949 |
| ENSMUSG00000042772.15 | <i>Smg7</i>          | -0.35 | 7.11 | 19.25 | 1.15E-05 | 0.000953 |
| ENSMUSG00000030067.17 | <i>Foxp1</i>         | -0.38 | 8.41 | 19.22 | 1.16E-05 | 0.000964 |
| ENSMUSG00000060938.14 | <i>Rpl26</i>         | -0.38 | 5.51 | 19.21 | 1.17E-05 | 0.000969 |
| ENSMUSG000000031520.6 | <i>Vegfc</i>         | -0.69 | 5.47 | 19.20 | 1.18E-05 | 0.000972 |
| ENSMUSG00000046295.13 | <i>Ankle1</i>        | -1.04 | 2.64 | 19.20 | 1.18E-05 | 0.000972 |
| ENSMUSG00000041235.12 | <i>Chd7</i>          | -0.42 | 8.82 | 19.16 | 1.20E-05 | 0.000988 |
| ENSMUSG00000041605.16 | <i>5730559C18Rik</i> | -0.75 | 3.99 | 19.15 | 1.21E-05 | 0.000993 |

P-value calculated with likelihood ratio tests. Adjusted P-value for multiple testing calculated using the Benjamini-Hochberg method (FDR).

Supplementary Table 3. Significantly upregulated genes by UMI RNA-seq (dKO-E vs. ctrl, FDR < 0.001)

| Ensembl Mouse Gene ID | Gene symbol          | logFC | logCPM | LR    | PValue   | FDR      | Up in cKO-E |
|-----------------------|----------------------|-------|--------|-------|----------|----------|-------------|
| ENSMUSG00000034154.15 | <i>Ino80</i>         | 0.62  | 6.83   | 73.53 | 9.92E-18 | 1.84E-14 |             |
| ENSMUSG00000031392.18 | <i>Irak1</i>         | 0.80  | 4.40   | 51.85 | 6.00E-13 | 5.03E-10 |             |
| ENSMUSG00000036461.15 | <i>Elf1</i>          | 0.62  | 5.18   | 44.77 | 2.21E-11 | 1.40E-08 |             |
| ENSMUSG00000042784.9  | <i>Muc1</i>          | 0.88  | 4.22   | 42.53 | 6.97E-11 | 3.93E-08 |             |
| ENSMUSG00000027887.11 | <i>Syp12</i>         | 0.92  | 3.69   | 40.52 | 1.95E-10 | 9.64E-08 |             |
| ENSMUSG00000055897.13 | <i>Ppp4r1l-ps</i>    | 0.52  | 5.34   | 40.14 | 2.36E-10 | 1.14E-07 |             |
| ENSMUSG00000028035.13 | <i>Dnajb4</i>        | 0.81  | 5.44   | 40.08 | 2.44E-10 | 1.17E-07 |             |
| ENSMUSG00000035270.15 | <i>Impg2</i>         | 0.91  | 3.69   | 39.14 | 3.95E-10 | 1.78E-07 |             |
| ENSMUSG00000042851.17 | <i>Zc3h6</i>         | 0.90  | 5.25   | 39.12 | 3.98E-10 | 1.78E-07 |             |
| ENSMUSG00000044244.18 | <i>Il20rb</i>        | 0.93  | 3.85   | 37.89 | 7.49E-10 | 3.14E-07 |             |
| ENSMUSG00000024330.16 | <i>Col11a2</i>       | 1.22  | 2.95   | 37.32 | 1.00E-09 | 4.10E-07 |             |
| ENSMUSG00000080727.2  | <i>C920021L13Rik</i> | 0.80  | 3.61   | 34.70 | 3.85E-09 | 1.37E-06 |             |
| ENSMUSG00000069835.10 | <i>Sat2</i>          | 1.65  | 1.79   | 30.71 | 2.99E-08 | 8.73E-06 |             |
| ENSMUSG00000028689.14 | <i>Ccdc163</i>       | 0.90  | 3.29   | 30.34 | 3.63E-08 | 1.05E-05 |             |
| ENSMUSG00000035545.13 | <i>Leng8</i>         | 0.53  | 6.62   | 30.26 | 3.78E-08 | 1.08E-05 |             |
| ENSMUSG00000056763.16 | <i>Csp1</i>          | 0.36  | 7.62   | 29.97 | 4.40E-08 | 1.23E-05 |             |
| ENSMUSG00000039191.12 | <i>Rbpj</i>          | 0.38  | 7.82   | 29.83 | 4.71E-08 | 1.30E-05 |             |
| ENSMUSG00000059674.6  | <i>Cdh24</i>         | 0.54  | 4.58   | 29.39 | 5.93E-08 | 1.61E-05 |             |
| ENSMUSG00000020389.19 | <i>Cdkl3</i>         | 0.63  | 5.04   | 26.91 | 2.13E-07 | 5.01E-05 |             |
| ENSMUSG00000042567.19 | <i>Nek10</i>         | 1.71  | 1.60   | 26.48 | 2.66E-07 | 6.17E-05 |             |
| ENSMUSG00000051427.14 | <i>Ccdc157</i>       | 0.72  | 3.50   | 26.02 | 3.38E-07 | 7.70E-05 |             |
| ENSMUSG00000022568.16 | <i>Scrib</i>         | 0.43  | 5.95   | 25.46 | 4.51E-07 | 0.000100 |             |
| ENSMUSG00000052139.18 | <i>Babam2</i>        | 0.33  | 6.62   | 25.28 | 4.95E-07 | 0.000107 |             |
| ENSMUSG00000058997.7  | <i>Vwa8</i>          | 0.37  | 6.35   | 25.27 | 4.99E-07 | 0.000107 |             |
| ENSMUSG00000020021.4  | <i>Fgd6</i>          | 0.76  | 4.57   | 25.08 | 5.50E-07 | 0.000116 |             |
| ENSMUSG00000022557.10 | <i>Bop1</i>          | 0.55  | 4.59   | 25.08 | 5.51E-07 | 0.000116 |             |
| ENSMUSG00000041264.16 | <i>Usp1</i>          | 0.38  | 5.88   | 24.98 | 5.79E-07 | 0.000121 |             |
| ENSMUSG00000036270.16 | <i>Edc4</i>          | 0.48  | 5.62   | 23.47 | 1.27E-06 | 0.000237 |             |
| ENSMUSG00000028794.13 | <i>A3galt2</i>       | 0.78  | 3.68   | 23.45 | 1.28E-06 | 0.000239 |             |
| ENSMUSG00000021958.4  | <i>Pinx1</i>         | 0.36  | 5.47   | 22.60 | 2.00E-06 | 0.000346 |             |
| ENSMUSG00000026771.14 | <i>Spopl</i>         | 0.33  | 6.47   | 22.36 | 2.26E-06 | 0.000387 |             |
| ENSMUSG00000046139.7  | <i>Patl1</i>         | 0.41  | 5.38   | 22.06 | 2.64E-06 | 0.000434 |             |
| ENSMUSG00000020456.17 | <i>Ogdh</i>          | 0.32  | 6.36   | 22.04 | 2.67E-06 | 0.000436 |             |
| ENSMUSG00000105961.1  | <i>NA</i>            | 1.01  | 2.46   | 21.47 | 3.59E-06 | 0.000553 |             |
| ENSMUSG00000055538.7  | <i>Zcchc24</i>       | 0.75  | 3.46   | 21.37 | 3.78E-06 | 0.000580 |             |
| ENSMUSG00000033009.15 | <i>Ogfod1</i>        | 0.44  | 4.61   | 21.22 | 4.09E-06 | 0.000618 |             |
| ENSMUSG00000073236.4  | <i>2500004C02Rik</i> | 0.59  | 3.50   | 21.19 | 4.15E-06 | 0.000623 |             |
| ENSMUSG00000042510.7  | <i>AA986860</i>      | 1.55  | 0.99   | 20.92 | 4.79E-06 | 0.000710 |             |
| ENSMUSG00000034303.7  | <i>Ccdc15</i>        | 0.42  | 5.32   | 20.62 | 5.60E-06 | 0.000809 |             |
| ENSMUSG00000109408.1  | <i>LOC102639982</i>  | 0.51  | 4.42   | 20.58 | 5.73E-06 | 0.000818 |             |
| ENSMUSG00000039137.18 | <i>Whrn</i>          | 0.55  | 4.34   | 20.53 | 5.89E-06 | 0.000837 |             |
| ENSMUSG0000007029.16  | <i>Vars</i>          | 0.43  | 5.89   | 20.36 | 6.41E-06 | 0.000897 |             |
| ENSMUSG00000035325.16 | <i>Sec31a</i>        | 0.30  | 6.47   | 20.15 | 7.17E-06 | 0.000975 |             |
| ENSMUSG00000039509.8  | <i>Nup133</i>        | 0.44  | 5.59   | 20.15 | 7.16E-06 | 0.000975 |             |

P-value calculated with likelihood ratio tests. Adjusted P-value for multiple testing calculated using the Benjamini-Hochberg method (FDR).

Supplementary Table 4. Significantly downregulated genes by UMI RNA-seq (dKO-E vs. ctrl, FDR < 0.001)

| Ensembl Mouse Gene ID  | Gene symbol          | logFC | logCPM | LR     | PValue   | FDR      | Down in cKO-E |
|------------------------|----------------------|-------|--------|--------|----------|----------|---------------|
| ENSMUSG00000028456.18  | <i>Unc13b</i>        | -1.13 | 6.91   | 225.47 | 5.79E-51 | 3.01E-46 |               |
| ENSMUSG00000040943.12  | <i>Tet2</i>          | -1.13 | 6.74   | 207.77 | 4.21E-47 | 1.09E-42 |               |
| ENSMUSG00000037386.15  | <i>Rims2</i>         | -1.01 | 7.99   | 187.98 | 8.77E-43 | 1.52E-38 |               |
| ENSMUSG00000034462.9   | <i>Pkd2</i>          | -1.01 | 5.93   | 180.27 | 4.23E-41 | 5.49E-37 |               |
| ENSMUSG00000022672.8   | <i>Prkdc</i>         | -1.21 | 6.05   | 177.75 | 1.50E-40 | 1.56E-36 |               |
| ENSMUSG00000030061.16  | <i>Uba3</i>          | -1.25 | 5.54   | 158.33 | 2.62E-36 | 2.27E-32 |               |
| ENSMUSG00000036023.5   | <i>Parp2</i>         | -1.76 | 3.62   | 153.60 | 2.83E-35 | 2.10E-31 |               |
| ENSMUSG00000032238.17  | <i>Rora</i>          | -0.96 | 7.75   | 143.59 | 4.37E-33 | 2.84E-29 |               |
| ENSMUSG00000036371.6   | <i>Serbp1</i>        | -0.98 | 7.25   | 139.95 | 2.73E-32 | 1.57E-28 |               |
| ENSMUSG00000032186.15  | <i>Tmod2</i>         | -0.91 | 6.12   | 134.97 | 3.35E-31 | 1.74E-27 |               |
| ENSMUSG00000073557.11  | <i>Ppp1r12b</i>      | -0.88 | 6.74   | 131.80 | 1.65E-30 | 7.81E-27 |               |
| ENSMUSG00000035798.14  | <i>Zdhhc17</i>       | -0.84 | 6.15   | 123.06 | 1.35E-28 | 5.85E-25 |               |
| ENSMUSG00000018501.17  | <i>Ncor1</i>         | -0.77 | 8.31   | 118.53 | 1.33E-27 | 5.29E-24 |               |
| ENSMUSG00000001127.12  | <i>Araf</i>          | -0.84 | 6.11   | 114.57 | 9.76E-27 | 3.38E-23 |               |
| ENSMUSG00000021027.16  | <i>Ralgapa1</i>      | -0.88 | 7.28   | 114.68 | 9.24E-27 | 3.38E-23 |               |
| ENSMUSG00000036377.18  | <i>C530008M17Rik</i> | -0.68 | 8.70   | 104.13 | 1.89E-24 | 5.91E-21 |               |
| ENSMUSG00000025154.14  | <i>Arhgap19</i>      | -1.30 | 4.42   | 104.09 | 1.94E-24 | 5.91E-21 |               |
| ENSMUSG00000028080.16  | <i>Lrba</i>          | -0.76 | 6.00   | 103.11 | 3.17E-24 | 9.14E-21 |               |
| ENSMUSG00000039967.14  | <i>Zfp292</i>        | -0.68 | 8.26   | 99.18  | 2.31E-23 | 6.30E-20 |               |
| ENSMUSG00000021577.14  | <i>Sdha</i>          | -0.85 | 5.42   | 91.68  | 1.02E-21 | 2.64E-18 |               |
| ENSMUSG00000003360.14  | <i>Ddx23</i>         | -0.99 | 4.72   | 88.91  | 4.13E-21 | 1.02E-17 |               |
| ENSMUSG00000061838.7   | <i>Suclg2</i>        | -1.05 | 5.40   | 87.59  | 8.04E-21 | 1.90E-17 |               |
| ENSMUSG00000058729.13  | <i>Lin9</i>          | -0.89 | 5.34   | 87.41  | 8.84E-21 | 1.99E-17 |               |
| ENSMUSG00000035704.17  | <i>Alg8</i>          | -1.08 | 4.04   | 83.98  | 4.99E-20 | 1.08E-16 |               |
| ENSMUSG00000031333.7   | <i>Abcb7</i>         | -0.67 | 6.08   | 83.80  | 5.47E-20 | 1.14E-16 |               |
| ENSMUSG00000029104.15  | <i>Htt</i>           | -0.59 | 6.91   | 75.40  | 3.84E-18 | 7.67E-15 |               |
| ENSMUSG00000031290.14  | <i>Lrch2</i>         | -0.78 | 6.43   | 73.89  | 8.24E-18 | 1.58E-14 |               |
| ENSMUSG00000063888.6   | <i>Rpl71l</i>        | -0.88 | 4.72   | 72.88  | 1.38E-17 | 2.47E-14 |               |
| ENSMUSG00000047454.12  | <i>Gphn</i>          | -0.67 | 7.46   | 72.68  | 1.53E-17 | 2.64E-14 |               |
| ENSMUSG00000026869.12  | <i>Psmc5</i>         | -0.98 | 4.66   | 72.25  | 1.89E-17 | 3.17E-14 |               |
| ENSMUSG00000035227.7   | <i>Spcs2</i>         | -0.82 | 4.77   | 71.70  | 2.50E-17 | 4.06E-14 |               |
| ENSMUSG00000071064.13  | <i>Zfp827</i>        | -0.71 | 7.45   | 71.61  | 2.63E-17 | 4.13E-14 |               |
| ENSMUSG00000028514.15  | <i>Usp24</i>         | -0.62 | 7.02   | 70.65  | 4.26E-17 | 6.50E-14 |               |
| ENSMUSG00000021669.15  | <i>Col4a3bp</i>      | -0.70 | 5.80   | 69.57  | 7.38E-17 | 1.09E-13 |               |
| ENSMUSG00000023868.15  | <i>Pde10a</i>        | -0.87 | 7.31   | 67.68  | 1.93E-16 | 2.78E-13 |               |
| ENSMUSG00000014426.8   | <i>Map3k4</i>        | -0.58 | 6.10   | 67.15  | 2.51E-16 | 3.52E-13 |               |
| ENSMUSG00000063446.4   | <i>Plppr1</i>        | -0.64 | 8.49   | 67.00  | 2.71E-16 | 3.71E-13 |               |
| ENSMUSG000000071757.10 | <i>Zhx2</i>          | -0.78 | 6.70   | 65.27  | 6.52E-16 | 8.68E-13 |               |
| ENSMUSG00000041921.16  | <i>Metap1d</i>       | -0.74 | 4.82   | 65.18  | 6.83E-16 | 8.86E-13 |               |
| ENSMUSG00000049421.13  | <i>Zfp260</i>        | -0.73 | 5.32   | 64.88  | 7.97E-16 | 1.01E-12 |               |
| ENSMUSG00000035967.15  | <i>Ints6l</i>        | -0.73 | 5.22   | 64.28  | 1.08E-15 | 1.34E-12 |               |
| ENSMUSG00000022636.13  | <i>Alcam</i>         | -0.69 | 8.67   | 64.10  | 1.18E-15 | 1.43E-12 |               |
| ENSMUSG00000038371.15  | <i>Sbf2</i>          | -0.53 | 8.38   | 62.77  | 2.33E-15 | 2.74E-12 |               |
| ENSMUSG00000035234.18  | <i>Abraxas1</i>      | -1.05 | 3.43   | 62.08  | 3.31E-15 | 3.81E-12 |               |
| ENSMUSG00000034402.3   | <i>Kcnh5</i>         | -0.85 | 6.00   | 60.89  | 6.05E-15 | 6.82E-12 |               |
| ENSMUSG00000039470.15  | <i>Zdhhc2</i>        | -0.96 | 4.42   | 59.94  | 9.80E-15 | 1.08E-11 |               |
| ENSMUSG00000040407.17  | <i>Akap9</i>         | -0.71 | 8.51   | 58.46  | 2.08E-14 | 2.24E-11 |               |
| ENSMUSG00000098097.7   | <i>NA</i>            | -0.74 | 5.06   | 58.43  | 2.11E-14 | 2.24E-11 |               |
| ENSMUSG00000039765.15  | <i>Cc2d2a</i>        | -0.94 | 4.51   | 58.35  | 2.20E-14 | 2.28E-11 |               |
| ENSMUSG00000059208.14  | <i>Hnrnpm</i>        | -0.51 | 7.95   | 58.31  | 2.24E-14 | 2.28E-11 |               |
| ENSMUSG00000097451.10  | <i>NA</i>            | -0.76 | 6.01   | 58.11  | 2.48E-14 | 2.47E-11 |               |
| ENSMUSG00000057914.15  | <i>Cacnb2</i>        | -0.70 | 7.54   | 55.52  | 9.26E-14 | 9.08E-11 |               |
| ENSMUSG00000084799.7   | <i>Ino80dos</i>      | -0.79 | 4.37   | 55.18  | 1.10E-13 | 1.05E-10 |               |
| ENSMUSG00000070866.4   | <i>Zfp804a</i>       | -0.81 | 5.50   | 55.16  | 1.11E-13 | 1.05E-10 |               |
| ENSMUSG00000025103.8   | <i>Btbd1</i>         | -0.59 | 5.88   | 55.10  | 1.15E-13 | 1.06E-10 |               |
| ENSMUSG00000021375.9   | <i>Kif13a</i>        | -0.65 | 6.00   | 54.41  | 1.63E-13 | 1.48E-10 |               |
| ENSMUSG00000037957.14  | <i>Wdr20</i>         | -0.53 | 6.21   | 54.03  | 1.98E-13 | 1.77E-10 |               |
| ENSMUSG00000028437.14  | <i>Ubap1</i>         | -0.58 | 5.84   | 53.85  | 2.17E-13 | 1.91E-10 |               |
| ENSMUSG00000020564.17  | <i>Atxn7l1</i>       | -0.52 | 7.49   | 53.07  | 3.22E-13 | 2.78E-10 |               |
| ENSMUSG00000032220.10  | <i>Myo1e</i>         | -0.71 | 4.57   | 52.12  | 5.22E-13 | 4.44E-10 |               |
| ENSMUSG00000063681.14  | <i>Crb1</i>          | -1.06 | 3.70   | 51.73  | 6.37E-13 | 5.25E-10 |               |
| ENSMUSG00000014164.14  | <i>Klhl3</i>         | -0.92 | 3.67   | 50.72  | 1.07E-12 | 8.65E-10 |               |
| ENSMUSG00000034285.15  | <i>Nipsnap1</i>      | -0.71 | 4.76   | 49.95  | 1.58E-12 | 1.26E-09 |               |
| ENSMUSG00000005882.18  | <i>Uqcc1</i>         | -0.61 | 5.41   | 49.89  | 1.62E-12 | 1.28E-09 |               |
| ENSMUSG00000064105.12  | <i>Cnnm2</i>         | -1.19 | 3.89   | 49.48  | 2.00E-12 | 1.55E-09 |               |
| ENSMUSG00000032498.9   | <i>Mlh1</i>          | -0.70 | 4.73   | 49.30  | 2.20E-12 | 1.68E-09 |               |
| ENSMUSG00000033854.10  | <i>Kcnk10</i>        | -0.63 | 7.78   | 49.20  | 2.31E-12 | 1.74E-09 |               |
| ENSMUSG00000020463.15  | <i>Ppp4r3b</i>       | -0.53 | 6.61   | 49.15  | 2.37E-12 | 1.76E-09 |               |

|                       |                      |       |      |       |          |          |
|-----------------------|----------------------|-------|------|-------|----------|----------|
| ENSMUSG00000025235.8  | <i>Bbs4</i>          | -1.15 | 3.50 | 48.96 | 2.61E-12 | 1.91E-09 |
| ENSMUSG00000061186.15 | <i>Sfmbt2</i>        | -1.64 | 2.56 | 48.81 | 2.82E-12 | 2.03E-09 |
| ENSMUSG00000020647.10 | <i>Ncoa1</i>         | -0.53 | 7.86 | 48.41 | 3.46E-12 | 2.46E-09 |
| ENSMUSG00000030982.18 | <i>9030624J02Rik</i> | -0.54 | 5.68 | 47.19 | 6.45E-12 | 4.53E-09 |
| ENSMUSG00000027204.13 | <i>Fbn1</i>          | -0.76 | 5.27 | 46.86 | 7.62E-12 | 5.27E-09 |
| ENSMUSG00000019951.10 | <i>Uhrf1bp11</i>     | -0.50 | 6.23 | 46.82 | 7.80E-12 | 5.33E-09 |
| ENSMUSG00000038538.17 | <i>Ubn2</i>          | -0.56 | 7.55 | 46.74 | 8.10E-12 | 5.46E-09 |
| ENSMUSG00000031684.11 | <i>Slc10a7</i>       | -0.53 | 6.73 | 46.18 | 1.08E-11 | 7.16E-09 |
| ENSMUSG00000035934.16 | <i>Pknox2</i>        | -0.56 | 6.49 | 45.17 | 1.80E-11 | 1.18E-08 |
| ENSMUSG00000057716.6  | <i>Tmem178b</i>      | -0.59 | 8.56 | 44.95 | 2.02E-11 | 1.31E-08 |
| ENSMUSG00000021938.11 | <i>Pspc1</i>         | -0.46 | 7.33 | 44.89 | 2.09E-11 | 1.34E-08 |
| ENSMUSG00000033740.17 | <i>St18</i>          | -0.54 | 6.17 | 44.59 | 2.42E-11 | 1.52E-08 |
| ENSMUSG00000056900.13 | <i>Usp13</i>         | -0.66 | 4.61 | 44.57 | 2.46E-11 | 1.52E-08 |
| ENSMUSG00000038070.15 | <i>Cntln</i>         | -0.55 | 6.43 | 44.52 | 2.52E-11 | 1.54E-08 |
| ENSMUSG00000040044.11 | <i>Orc3</i>          | -0.71 | 5.36 | 44.34 | 2.76E-11 | 1.66E-08 |
| ENSMUSG00000019894.14 | <i>Slc6a15</i>       | -0.85 | 4.27 | 43.63 | 3.96E-11 | 2.36E-08 |
| ENSMUSG00000025810.9  | <i>Nrp1</i>          | -0.61 | 7.40 | 43.39 | 4.48E-11 | 2.64E-08 |
| ENSMUSG00000021039.9  | <i>Snw1</i>          | -0.61 | 5.31 | 43.17 | 5.02E-11 | 2.93E-08 |
| ENSMUSG00000034295.9  | <i>Fhod3</i>         | -0.42 | 7.96 | 42.61 | 6.68E-11 | 3.85E-08 |
| ENSMUSG00000047539.9  | <i>Fbxo28</i>        | -0.54 | 5.56 | 42.56 | 6.86E-11 | 3.91E-08 |
| ENSMUSG00000052613.16 | <i>Pcdh15</i>        | -0.69 | 6.19 | 42.34 | 7.68E-11 | 4.29E-08 |
| ENSMUSG00000038248.8  | <i>Sobp</i>          | -0.65 | 7.11 | 42.12 | 8.58E-11 | 4.74E-08 |
| ENSMUSG00000015189.12 | <i>Casd1</i>         | -0.51 | 5.37 | 41.72 | 1.05E-10 | 5.71E-08 |
| ENSMUSG00000029782.19 | <i>Tmem209</i>       | -0.70 | 4.50 | 41.71 | 1.06E-10 | 5.71E-08 |
| ENSMUSG00000032263.14 | <i>Bckdhh</i>        | -0.61 | 5.55 | 41.67 | 1.08E-10 | 5.80E-08 |
| ENSMUSG00000029432.12 | <i>Nipsnap2</i>      | -0.65 | 4.59 | 41.52 | 1.17E-10 | 6.19E-08 |
| ENSMUSG0000004233.14  | <i>Wars2</i>         | -0.71 | 4.52 | 41.36 | 1.27E-10 | 6.64E-08 |
| ENSMUSG00000091722.1  | <i>Siah3</i>         | -0.53 | 7.36 | 41.14 | 1.42E-10 | 7.37E-08 |
| ENSMUSG00000006678.6  | <i>Pola1</i>         | -0.55 | 7.53 | 40.94 | 1.57E-10 | 8.00E-08 |
| ENSMUSG00000027650.12 | <i>Tti1</i>          | -0.73 | 4.49 | 40.95 | 1.56E-10 | 8.00E-08 |
| ENSMUSG00000079157.4  | <i>Fam155a</i>       | -0.80 | 7.44 | 40.73 | 1.74E-10 | 8.79E-08 |
| ENSMUSG00000021614.16 | <i>Vcan</i>          | -0.55 | 8.18 | 40.58 | 1.89E-10 | 9.43E-08 |
| ENSMUSG00000019907.10 | <i>Ppp1r12a</i>      | -0.49 | 7.41 | 40.24 | 2.25E-10 | 1.10E-07 |
| ENSMUSG00000097311.7  | <i>NA</i>            | -0.81 | 5.84 | 40.03 | 2.50E-10 | 1.19E-07 |
| ENSMUSG00000085438.1  | <i>1700020I14Rik</i> | -0.49 | 6.85 | 39.71 | 2.95E-10 | 1.39E-07 |
| ENSMUSG00000056014.15 | <i>A430033K04Rik</i> | -0.67 | 4.47 | 39.65 | 3.03E-10 | 1.42E-07 |
| ENSMUSG00000027428.9  | <i>Rbbp9</i>         | -0.97 | 3.46 | 39.51 | 3.27E-10 | 1.52E-07 |
| ENSMUSG00000032040.15 | <i>Dcps</i>          | -0.73 | 3.90 | 39.42 | 3.42E-10 | 1.57E-07 |
| ENSMUSG00000029179.14 | <i>Zcchc4</i>        | -0.67 | 4.72 | 39.28 | 3.68E-10 | 1.67E-07 |
| ENSMUSG00000034573.14 | <i>Ptpn13</i>        | -0.59 | 5.54 | 39.09 | 4.04E-10 | 1.79E-07 |
| ENSMUSG00000063297.7  | <i>Luzp2</i>         | -0.79 | 5.23 | 38.49 | 5.51E-10 | 2.42E-07 |
| ENSMUSG00000036672.5  | <i>Cenpt</i>         | -0.83 | 3.75 | 38.33 | 5.98E-10 | 2.61E-07 |
| ENSMUSG00000021745.13 | <i>Ptprg</i>         | -0.39 | 9.27 | 38.22 | 6.32E-10 | 2.73E-07 |
| ENSMUSG00000026275.13 | <i>Ppp1r7</i>        | -0.64 | 5.16 | 38.13 | 6.63E-10 | 2.83E-07 |
| ENSMUSG00000031309.15 | <i>Rps6ka3</i>       | -0.49 | 6.73 | 38.12 | 6.65E-10 | 2.83E-07 |
| ENSMUSG00000037852.8  | <i>Cpe</i>           | -0.44 | 7.02 | 37.95 | 7.27E-10 | 3.07E-07 |
| ENSMUSG00000071753.11 | <i>C230004F18Rik</i> | -0.70 | 5.22 | 37.81 | 7.79E-10 | 3.24E-07 |
| ENSMUSG00000030231.11 | <i>Plekha5</i>       | -0.42 | 7.98 | 37.78 | 7.93E-10 | 3.27E-07 |
| ENSMUSG00000052812.5  | <i>Atad2b</i>        | -0.46 | 7.39 | 36.95 | 1.21E-09 | 4.91E-07 |
| ENSMUSG00000033732.10 | <i>Sf3b3</i>         | -0.46 | 6.83 | 36.89 | 1.25E-09 | 5.03E-07 |
| ENSMUSG00000026058.11 | <i>Khdrbs2</i>       | -0.62 | 7.90 | 36.87 | 1.26E-09 | 5.04E-07 |
| ENSMUSG00000062328.7  | <i>Rpl17</i>         | -0.65 | 5.62 | 36.68 | 1.39E-09 | 5.52E-07 |
| ENSMUSG00000060862.10 | <i>Zbtb40</i>        | -0.65 | 4.92 | 36.60 | 1.45E-09 | 5.70E-07 |
| ENSMUSG00000021981.9  | <i>Cab39l</i>        | -0.68 | 4.43 | 36.52 | 1.51E-09 | 5.84E-07 |
| ENSMUSG00000054423.13 | <i>Cadps</i>         | -0.55 | 8.63 | 36.53 | 1.51E-09 | 5.84E-07 |
| ENSMUSG00000050312.11 | <i>Nsun3</i>         | -0.75 | 4.04 | 36.46 | 1.56E-09 | 6.00E-07 |
| ENSMUSG00000095041.7  | <i>NA</i>            | -1.94 | 3.40 | 36.10 | 1.87E-09 | 7.14E-07 |
| ENSMUSG00000053025.13 | <i>Sv2b</i>          | -0.60 | 4.93 | 36.05 | 1.92E-09 | 7.28E-07 |
| ENSMUSG00000010392.8  | <i>Gosr1</i>         | -0.51 | 5.02 | 35.85 | 2.13E-09 | 8.02E-07 |
| ENSMUSG00000060579.12 | <i>Fhit</i>          | -0.53 | 5.83 | 35.80 | 2.19E-09 | 8.17E-07 |
| ENSMUSG00000055296.14 | <i>Tmem245</i>       | -0.46 | 6.60 | 35.46 | 2.60E-09 | 9.65E-07 |
| ENSMUSG00000032050.17 | <i>Rdx</i>           | -0.44 | 7.41 | 35.43 | 2.65E-09 | 9.74E-07 |
| ENSMUSG00000018433.14 | <i>Nol11</i>         | -0.49 | 5.27 | 35.33 | 2.78E-09 | 1.02E-06 |
| ENSMUSG00000056476.13 | <i>Med12l</i>        | -0.50 | 7.01 | 35.31 | 2.81E-09 | 1.02E-06 |
| ENSMUSG00000041912.12 | <i>Tdrkh</i>         | -0.76 | 4.49 | 34.90 | 3.47E-09 | 1.25E-06 |
| ENSMUSG00000002870.8  | <i>Mcm2</i>          | -0.73 | 6.14 | 34.74 | 3.78E-09 | 1.35E-06 |
| ENSMUSG00000042156.15 | <i>Dzip1</i>         | -0.49 | 5.93 | 34.50 | 4.26E-09 | 1.50E-06 |
| ENSMUSG00000017631.18 | <i>Abr</i>           | -0.60 | 6.27 | 34.34 | 4.63E-09 | 1.62E-06 |
| ENSMUSG00000058325.6  | <i>Dock1</i>         | -0.49 | 7.38 | 34.33 | 4.66E-09 | 1.62E-06 |
| ENSMUSG00000049550.17 | <i>Clip1</i>         | -0.38 | 7.33 | 34.00 | 5.52E-09 | 1.91E-06 |
| ENSMUSG00000039456.9  | <i>Morc3</i>         | -0.45 | 5.64 | 33.92 | 5.75E-09 | 1.98E-06 |
| ENSMUSG00000021846.8  | <i>Peli2</i>         | -0.44 | 6.97 | 33.87 | 5.89E-09 | 2.01E-06 |

|                        |                      |       |       |       |          |          |  |
|------------------------|----------------------|-------|-------|-------|----------|----------|--|
| ENSMUSG00000020952.10  | <i>Scfd1</i>         | -0.53 | 5.40  | 33.66 | 6.56E-09 | 2.23E-06 |  |
| ENSMUSG00000034912.17  | <i>Mdga2</i>         | -0.64 | 6.94  | 33.64 | 6.62E-09 | 2.23E-06 |  |
| ENSMUSG00000025785.5   | <i>Exosc7</i>        | -0.73 | 4.53  | 33.56 | 6.92E-09 | 2.32E-06 |  |
| ENSMUSG00000022311.15  | <i>Csmd3</i>         | -0.73 | 6.62  | 33.44 | 7.35E-09 | 2.45E-06 |  |
| ENSMUSG00000060923.5   | <i>Acyp2</i>         | -0.82 | 3.75  | 32.97 | 9.38E-09 | 3.10E-06 |  |
| ENSMUSG00000038855.10  | <i>Itpkb</i>         | -0.82 | 4.23  | 32.80 | 1.02E-08 | 3.34E-06 |  |
| ENSMUSG00000049940.7   | <i>Pgmmc2</i>        | -0.58 | 4.51  | 32.81 | 1.02E-08 | 3.34E-06 |  |
| ENSMUSG00000039671.18  | <i>Zmynd8</i>        | -0.47 | 7.29  | 32.73 | 1.06E-08 | 3.44E-06 |  |
| ENSMUSG00000018427.7   | <i>Ypel2</i>         | -0.66 | 4.83  | 32.54 | 1.17E-08 | 3.77E-06 |  |
| ENSMUSG00000000976.13  | <i>Heatr6</i>        | -0.51 | 5.46  | 32.43 | 1.24E-08 | 3.96E-06 |  |
| ENSMUSG000000009647.13 | <i>Mcu</i>           | -0.44 | 6.10  | 32.40 | 1.25E-08 | 3.99E-06 |  |
| ENSMUSG00000041879.13  | <i>Ipo9</i>          | -0.40 | 7.28  | 32.06 | 1.50E-08 | 4.74E-06 |  |
| ENSMUSG00000013663.7   | <i>Pten</i>          | -0.42 | 6.87  | 32.02 | 1.53E-08 | 4.80E-06 |  |
| ENSMUSG00000075028.11  | <i>Prdm11</i>        | -0.47 | 5.62  | 31.99 | 1.55E-08 | 4.84E-06 |  |
| ENSMUSG00000017692.8   | <i>Rhbdl3</i>        | -0.48 | 6.94  | 31.93 | 1.60E-08 | 4.97E-06 |  |
| ENSMUSG00000039753.16  | <i>Fbxl5</i>         | -0.42 | 6.24  | 31.86 | 1.66E-08 | 5.13E-06 |  |
| ENSMUSG00000048661.14  | <i>Lemd3</i>         | -0.42 | 6.31  | 31.80 | 1.71E-08 | 5.24E-06 |  |
| ENSMUSG00000025332.14  | <i>Kdm5c</i>         | -0.67 | 6.06  | 31.76 | 1.74E-08 | 5.32E-06 |  |
| ENSMUSG00000032394.6   | <i>Igdcc3</i>        | -0.59 | 5.63  | 31.61 | 1.89E-08 | 5.73E-06 |  |
| ENSMUSG00000007908.14  | <i>Hmgcll1</i>       | -0.56 | 4.44  | 31.55 | 1.94E-08 | 5.86E-06 |  |
| ENSMUSG000000025609.15 | <i>Mkln1</i>         | -0.36 | 7.15  | 31.46 | 2.04E-08 | 6.12E-06 |  |
| ENSMUSG00000028760.16  | <i>Eif4g3</i>        | -0.39 | 8.59  | 31.36 | 2.14E-08 | 6.39E-06 |  |
| ENSMUSG00000022306.8   | <i>Zfpn2</i>         | -0.43 | 8.50  | 31.26 | 2.26E-08 | 6.70E-06 |  |
| ENSMUSG00000039968.9   | <i>Rsbn11</i>        | -0.43 | 5.93  | 31.02 | 2.55E-08 | 7.53E-06 |  |
| ENSMUSG00000036242.14  | <i>3632451O06Rik</i> | -0.73 | 3.83  | 30.98 | 2.61E-08 | 7.65E-06 |  |
| ENSMUSG00000019792.8   | <i>Trmt11</i>        | -0.45 | 5.66  | 30.36 | 3.59E-08 | 1.04E-05 |  |
| ENSMUSG00000085816.1   | <i>NA</i>            | -0.41 | 6.75  | 30.26 | 3.78E-08 | 1.08E-05 |  |
| ENSMUSG00000031198.4   | <i>Fundc2</i>        | -1.04 | 2.53  | 30.24 | 3.82E-08 | 1.08E-05 |  |
| ENSMUSG00000074129.13  | <i>Rpl13a</i>        | -1.10 | 2.66  | 30.13 | 4.03E-08 | 1.14E-05 |  |
| ENSMUSG00000005886.14  | <i>Ncoa2</i>         | -0.38 | 8.15  | 30.09 | 4.12E-08 | 1.16E-05 |  |
| ENSMUSG00000041220.10  | <i>Elovl6</i>        | -0.47 | 7.32  | 29.84 | 4.70E-08 | 1.30E-05 |  |
| ENSMUSG00000034252.14  | <i>Senp6</i>         | -0.40 | 7.54  | 29.62 | 5.27E-08 | 1.45E-05 |  |
| ENSMUSG00000060938.14  | <i>Rpl26</i>         | -0.57 | 5.44  | 29.58 | 5.36E-08 | 1.47E-05 |  |
| ENSMUSG00000005583.16  | <i>Mef2c</i>         | -0.64 | 6.22  | 29.34 | 6.08E-08 | 1.65E-05 |  |
| ENSMUSG000000026748.13 | <i>Plxdc2</i>        | -0.69 | 4.39  | 29.24 | 6.41E-08 | 1.72E-05 |  |
| ENSMUSG00000074505.5   | <i>Fat3</i>          | -0.37 | 9.68  | 29.16 | 6.68E-08 | 1.78E-05 |  |
| ENSMUSG00000003452.15  | <i>Bicd1</i>         | -0.47 | 7.03  | 29.15 | 6.68E-08 | 1.78E-05 |  |
| ENSMUSG00000039089.15  | <i>L3mbtl3</i>       | -0.44 | 6.04  | 29.01 | 7.20E-08 | 1.91E-05 |  |
| ENSMUSG00000027238.17  | <i>Frmf5</i>         | -0.43 | 8.68  | 28.99 | 7.29E-08 | 1.92E-05 |  |
| ENSMUSG000000045671.17 | <i>Spred2</i>        | -0.48 | 6.48  | 28.97 | 7.35E-08 | 1.93E-05 |  |
| ENSMUSG00000041624.10  | <i>Gucy1a2</i>       | -0.41 | 6.84  | 28.72 | 8.35E-08 | 2.18E-05 |  |
| ENSMUSG000000101609.1  | <i>Kcnq1ot1</i>      | -0.44 | 7.51  | 28.70 | 8.47E-08 | 2.20E-05 |  |
| ENSMUSG00000086193.1   | <i>NA</i>            | -0.75 | 3.73  | 28.59 | 8.95E-08 | 2.31E-05 |  |
| ENSMUSG00000030846.15  | <i>Tial1</i>         | -0.39 | 6.38  | 28.29 | 1.04E-07 | 2.68E-05 |  |
| ENSMUSG00000058571.10  | <i>Gpc6</i>          | -0.47 | 10.42 | 28.26 | 1.06E-07 | 2.71E-05 |  |
| ENSMUSG00000021072.12  | <i>Tmx1</i>          | -0.54 | 4.84  | 28.02 | 1.20E-07 | 3.06E-05 |  |
| ENSMUSG00000052446.17  | <i>Zfp961</i>        | -0.54 | 5.03  | 27.98 | 1.23E-07 | 3.11E-05 |  |
| ENSMUSG00000019889.10  | <i>Ptprk</i>         | -0.38 | 8.01  | 27.81 | 1.34E-07 | 3.37E-05 |  |
| ENSMUSG000000026220.6  | <i>Slc16a14</i>      | -0.66 | 3.94  | 27.80 | 1.34E-07 | 3.37E-05 |  |
| ENSMUSG00000032397.7   | <i>Tipin</i>         | -0.49 | 5.29  | 27.58 | 1.51E-07 | 3.77E-05 |  |
| ENSMUSG00000040488.17  | <i>Ltbp4</i>         | -0.73 | 3.91  | 27.54 | 1.54E-07 | 3.81E-05 |  |
| ENSMUSG00000041891.15  | <i>Lman1</i>         | -0.58 | 4.33  | 27.54 | 1.54E-07 | 3.81E-05 |  |
| ENSMUSG00000026495.8   | <i>Efcab2</i>        | -1.05 | 2.86  | 27.51 | 1.56E-07 | 3.82E-05 |  |
| ENSMUSG000000020019.4  | <i>Ntn4</i>          | -0.48 | 5.92  | 27.51 | 1.56E-07 | 3.82E-05 |  |
| ENSMUSG00000027332.11  | <i>Ivd</i>           | -0.62 | 4.32  | 27.38 | 1.67E-07 | 4.08E-05 |  |
| ENSMUSG00000052105.16  | <i>Mtcl1</i>         | -0.38 | 6.45  | 27.32 | 1.72E-07 | 4.18E-05 |  |
| ENSMUSG00000033502.14  | <i>Cdc14a</i>        | -0.45 | 7.02  | 27.31 | 1.73E-07 | 4.18E-05 |  |
| ENSMUSG00000020841.5   | <i>Cpd</i>           | -0.45 | 5.45  | 27.22 | 1.81E-07 | 4.36E-05 |  |
| ENSMUSG000000034858.16 | <i>Fam214a</i>       | -0.51 | 5.93  | 27.21 | 1.82E-07 | 4.36E-05 |  |
| ENSMUSG00000025790.14  | <i>Slco3a1</i>       | -0.46 | 6.80  | 27.18 | 1.86E-07 | 4.42E-05 |  |
| ENSMUSG00000047747.10  | <i>Rnf150</i>        | -0.53 | 6.59  | 27.06 | 1.97E-07 | 4.67E-05 |  |
| ENSMUSG00000075318.12  | <i>Scn2a</i>         | -0.83 | 3.73  | 27.02 | 2.01E-07 | 4.75E-05 |  |
| ENSMUSG00000068373.14  | <i>D430041D05Rik</i> | -0.38 | 7.08  | 26.78 | 2.28E-07 | 5.33E-05 |  |
| ENSMUSG000000026163.17 | <i>Sphkap</i>        | -1.03 | 3.76  | 26.50 | 2.63E-07 | 6.13E-05 |  |
| ENSMUSG00000019837.8   | <i>Gtf3c6</i>        | -0.65 | 4.32  | 26.38 | 2.80E-07 | 6.46E-05 |  |
| ENSMUSG00000030465.19  | <i>Psd3</i>          | -0.41 | 7.86  | 26.37 | 2.82E-07 | 6.47E-05 |  |
| ENSMUSG00000022483.16  | <i>Col2a1</i>        | -0.76 | 4.85  | 26.27 | 2.97E-07 | 6.78E-05 |  |
| ENSMUSG00000002459.17  | <i>Rgs20</i>         | -0.43 | 7.37  | 25.81 | 3.77E-07 | 8.54E-05 |  |
| ENSMUSG00000029863.13  | <i>Casp2</i>         | -0.46 | 5.50  | 25.70 | 3.98E-07 | 8.98E-05 |  |
| ENSMUSG00000029705.17  | <i>Cux1</i>          | -0.36 | 8.85  | 25.60 | 4.21E-07 | 9.45E-05 |  |
| ENSMUSG00000016520.7   | <i>Lnx2</i>          | -0.57 | 4.28  | 25.51 | 4.41E-07 | 9.86E-05 |  |
| ENSMUSG00000038602.7   | <i>Slc35f1</i>       | -0.34 | 9.66  | 25.44 | 4.56E-07 | 0.000101 |  |

|                       |                      |       |       |       |          |          |  |
|-----------------------|----------------------|-------|-------|-------|----------|----------|--|
| ENSMUSG00000034032.15 | <i>Rpap1</i>         | -0.56 | 4.25  | 25.43 | 4.58E-07 | 0.000101 |  |
| ENSMUSG00000039345.15 | <i>Mettl22</i>       | -0.90 | 3.09  | 25.45 | 4.55E-07 | 0.000101 |  |
| ENSMUSG00000028519.16 | <i>Dab1</i>          | -0.36 | 9.61  | 25.37 | 4.74E-07 | 0.000104 |  |
| ENSMUSG00000055024.12 | <i>Ep300</i>         | -0.34 | 7.20  | 25.35 | 4.78E-07 | 0.000104 |  |
| ENSMUSG00000045962.16 | <i>Wnk1</i>          | -0.35 | 8.05  | 25.31 | 4.89E-07 | 0.000106 |  |
| ENSMUSG00000074968.11 | <i>Ano3</i>          | -1.99 | 1.14  | 25.15 | 5.30E-07 | 0.000114 |  |
| ENSMUSG00000021314.12 | <i>Amph</i>          | -0.54 | 5.24  | 25.15 | 5.32E-07 | 0.000114 |  |
| ENSMUSG00000056296.16 | <i>Synpr</i>         | -0.89 | 3.41  | 25.10 | 5.44E-07 | 0.000116 |  |
| ENSMUSG00000059187.12 | <i>Fam19a1</i>       | -2.51 | 2.91  | 25.06 | 5.55E-07 | 0.000117 |  |
| ENSMUSG00000023033.14 | <i>Scn8a</i>         | -0.56 | 6.42  | 25.00 | 5.74E-07 | 0.000120 |  |
| ENSMUSG00000031985.9  | <i>Gnpat</i>         | -0.45 | 5.05  | 24.92 | 5.97E-07 | 0.000124 |  |
| ENSMUSG00000040481.17 | <i>Bptf</i>          | -0.33 | 7.94  | 24.82 | 6.29E-07 | 0.000130 |  |
| ENSMUSG00000042444.10 | <i>Mindy2</i>        | -0.64 | 4.22  | 24.75 | 6.52E-07 | 0.000134 |  |
| ENSMUSG00000022186.14 | <i>Oxct1</i>         | -0.34 | 6.65  | 24.74 | 6.57E-07 | 0.000135 |  |
| ENSMUSG00000049119.14 | <i>Fam110b</i>       | -0.37 | 6.94  | 24.66 | 6.85E-07 | 0.000140 |  |
| ENSMUSG00000030257.16 | <i>Srgap3</i>        | -0.37 | 8.88  | 24.64 | 6.91E-07 | 0.000141 |  |
| ENSMUSG00000057841.5  | <i>Rpl32</i>         | -0.58 | 6.37  | 24.57 | 7.17E-07 | 0.000145 |  |
| ENSMUSG00000040594.19 | <i>Ranbp17</i>       | -0.46 | 6.28  | 24.53 | 7.32E-07 | 0.000148 |  |
| ENSMUSG00000028863.13 | <i>Meaf6</i>         | -0.52 | 5.27  | 24.39 | 7.86E-07 | 0.000158 |  |
| ENSMUSG00000050310.8  | <i>Rictor</i>        | -0.36 | 6.83  | 24.33 | 8.11E-07 | 0.000163 |  |
| ENSMUSG00000024853.9  | <i>Sf3b2</i>         | -0.40 | 7.42  | 24.15 | 8.91E-07 | 0.000177 |  |
| ENSMUSG00000097723.1  | <i>NA</i>            | -2.25 | 1.92  | 24.16 | 8.88E-07 | 0.000177 |  |
| ENSMUSG00000026565.18 | <i>Pou2f1</i>        | -0.38 | 8.06  | 24.12 | 9.07E-07 | 0.000180 |  |
| ENSMUSG00000069793.12 | <i>Slfn9</i>         | -1.54 | 3.20  | 24.04 | 9.45E-07 | 0.000187 |  |
| ENSMUSG00000062627.9  | <i>Mysm1</i>         | -0.38 | 5.73  | 23.94 | 9.94E-07 | 0.000195 |  |
| ENSMUSG00000037072.15 | <i>Selenof</i>       | -0.35 | 5.84  | 23.90 | 1.01E-06 | 0.000198 |  |
| ENSMUSG00000032342.13 | <i>Mto1</i>          | -0.48 | 4.32  | 23.88 | 1.03E-06 | 0.000201 |  |
| ENSMUSG00000037286.15 | <i>Stag1</i>         | -0.33 | 8.46  | 23.87 | 1.03E-06 | 0.000201 |  |
| ENSMUSG00000042599.8  | <i>Kdm7a</i>         | -0.43 | 6.27  | 23.84 | 1.05E-06 | 0.000203 |  |
| ENSMUSG00000035199.6  | <i>Arl6ip5</i>       | -0.61 | 3.95  | 23.79 | 1.07E-06 | 0.000207 |  |
| ENSMUSG00000025969.15 | <i>Nrp2</i>          | -0.55 | 5.54  | 23.67 | 1.14E-06 | 0.000219 |  |
| ENSMUSG00000069135.11 | <i>Fgfr1op</i>       | -0.45 | 4.97  | 23.63 | 1.17E-06 | 0.000223 |  |
| ENSMUSG00000042225.3  | <i>Ammecr1</i>       | -0.40 | 5.47  | 23.62 | 1.17E-06 | 0.000223 |  |
| ENSMUSG00000032228.16 | <i>Tcf12</i>         | -0.32 | 9.15  | 23.63 | 1.17E-06 | 0.000223 |  |
| ENSMUSG00000040118.15 | <i>Cacna2d1</i>      | -0.45 | 9.85  | 23.62 | 1.17E-06 | 0.000223 |  |
| ENSMUSG00000023088.16 | <i>Abcc1</i>         | -0.44 | 5.13  | 23.54 | 1.22E-06 | 0.000231 |  |
| ENSMUSG00000068040.10 | <i>Tm9sf4</i>        | -0.39 | 5.33  | 23.49 | 1.25E-06 | 0.000236 |  |
| ENSMUSG00000031284.16 | <i>Pak3</i>          | -0.38 | 8.22  | 23.45 | 1.28E-06 | 0.000239 |  |
| ENSMUSG00000021431.14 | <i>Snrnp48</i>       | -0.45 | 4.72  | 23.41 | 1.31E-06 | 0.000243 |  |
| ENSMUSG00000033948.3  | <i>Zswim5</i>        | -0.41 | 6.84  | 23.30 | 1.38E-06 | 0.000255 |  |
| ENSMUSG00000042401.6  | <i>Crtac1</i>        | -0.70 | 4.60  | 23.31 | 1.38E-06 | 0.000255 |  |
| ENSMUSG00000043940.15 | <i>Wdfy3</i>         | -0.32 | 8.62  | 23.26 | 1.41E-06 | 0.000259 |  |
| ENSMUSG00000092837.1  | <i>Rpph1</i>         | -0.68 | 8.05  | 23.26 | 1.41E-06 | 0.000259 |  |
| ENSMUSG00000031530.6  | <i>Dusp4</i>         | -0.53 | 4.94  | 23.17 | 1.48E-06 | 0.000270 |  |
| ENSMUSG00000024268.15 | <i>Cellf4</i>        | -0.61 | 8.28  | 23.13 | 1.51E-06 | 0.000274 |  |
| ENSMUSG00000079056.12 | <i>Kcnip3</i>        | -0.59 | 5.13  | 23.05 | 1.58E-06 | 0.000285 |  |
| ENSMUSG00000046668.8  | <i>Cxzc5</i>         | -0.50 | 4.97  | 23.05 | 1.58E-06 | 0.000285 |  |
| ENSMUSG00000059602.14 | <i>Syn3</i>          | -0.37 | 6.70  | 22.98 | 1.64E-06 | 0.000294 |  |
| ENSMUSG00000084967.1  | <i>NA</i>            | -0.91 | 2.76  | 22.96 | 1.65E-06 | 0.000296 |  |
| ENSMUSG00000063810.7  | <i>Alms1</i>         | -0.40 | 6.92  | 22.95 | 1.67E-06 | 0.000296 |  |
| ENSMUSG00000021420.12 | <i>Fars2</i>         | -0.32 | 7.53  | 22.95 | 1.67E-06 | 0.000296 |  |
| ENSMUSG00000044288.6  | <i>Cnr1</i>          | -0.36 | 7.08  | 22.83 | 1.77E-06 | 0.000314 |  |
| ENSMUSG00000087620.7  | <i>5330434G04Rik</i> | -0.42 | 6.20  | 22.80 | 1.80E-06 | 0.000317 |  |
| ENSMUSG00000006403.13 | <i>Adamts4</i>       | -1.03 | 2.04  | 22.77 | 1.83E-06 | 0.000321 |  |
| ENSMUSG00000019494.14 | <i>Cops6</i>         | -0.50 | 4.59  | 22.72 | 1.88E-06 | 0.000329 |  |
| ENSMUSG00000024064.13 | <i>Galnt14</i>       | -0.70 | 5.45  | 22.67 | 1.92E-06 | 0.000336 |  |
| ENSMUSG00000039286.12 | <i>Fndc3b</i>        | -0.40 | 6.24  | 22.67 | 1.93E-06 | 0.000336 |  |
| ENSMUSG00000067028.11 | <i>Cntnap5b</i>      | -0.63 | 3.53  | 22.62 | 1.98E-06 | 0.000343 |  |
| ENSMUSG000000101011.6 | <i>NA</i>            | -1.98 | 0.65  | 22.53 | 2.07E-06 | 0.000357 |  |
| ENSMUSG00000045867.10 | <i>Cradd</i>         | -0.37 | 5.75  | 22.43 | 2.18E-06 | 0.000375 |  |
| ENSMUSG00000029128.12 | <i>Rab28</i>         | -0.42 | 6.34  | 22.35 | 2.27E-06 | 0.000388 |  |
| ENSMUSG000000102252.5 | <i>Snrpn</i>         | -0.57 | 5.57  | 22.31 | 2.32E-06 | 0.000395 |  |
| ENSMUSG00000040667.11 | <i>Nup88</i>         | -0.43 | 5.87  | 22.23 | 2.41E-06 | 0.000409 |  |
| ENSMUSG00000025217.14 | <i>Btrc</i>          | -0.36 | 7.02  | 22.22 | 2.44E-06 | 0.000412 |  |
| ENSMUSG00000025812.17 | <i>Pard3</i>         | -0.41 | 9.08  | 22.18 | 2.48E-06 | 0.000418 |  |
| ENSMUSG00000029086.15 | <i>Prom1</i>         | -0.40 | 6.74  | 22.15 | 2.52E-06 | 0.000423 |  |
| ENSMUSG00000027253.15 | <i>Lrp4</i>          | -0.45 | 6.51  | 22.14 | 2.54E-06 | 0.000425 |  |
| ENSMUSG00000035623.14 | <i>Rsf1</i>          | -0.32 | 7.51  | 22.07 | 2.62E-06 | 0.000434 |  |
| ENSMUSG00000022139.16 | <i>Mbnl2</i>         | -0.37 | 5.78  | 22.08 | 2.62E-06 | 0.000434 |  |
| ENSMUSG00000025551.13 | <i>Fgf14</i>         | -0.59 | 8.15  | 22.07 | 2.63E-06 | 0.000434 |  |
| ENSMUSG00000061731.9  | <i>Ext1</i>          | -0.34 | 8.89  | 22.07 | 2.63E-06 | 0.000434 |  |
| ENSMUSG00000056073.16 | <i>Grik2</i>         | -0.35 | 10.25 | 22.06 | 2.64E-06 | 0.000434 |  |

|                        |                      |       |       |       |          |          |  |
|------------------------|----------------------|-------|-------|-------|----------|----------|--|
| ENSMUSG00000059146.12  | <i>Ntrk3</i>         | -0.33 | 8.77  | 22.04 | 2.66E-06 | 0.000436 |  |
| ENSMUSG00000051177.16  | <i>Plcb1</i>         | -0.41 | 9.70  | 22.01 | 2.71E-06 | 0.000438 |  |
| ENSMUSG00000063760.9   | <i>Rnf217</i>        | -0.32 | 6.45  | 22.01 | 2.72E-06 | 0.000438 |  |
| ENSMUSG00000020640.10  | <i>Itsn2</i>         | -0.39 | 5.57  | 22.00 | 2.73E-06 | 0.000438 |  |
| ENSMUSG00000027272.5   | <i>Ubr1</i>          | -0.34 | 6.82  | 22.02 | 2.70E-06 | 0.000438 |  |
| ENSMUSG00000031320.9   | <i>Rps4x</i>         | -0.75 | 4.72  | 22.01 | 2.71E-06 | 0.000438 |  |
| ENSMUSG00000031878.18  | <i>Nae1</i>          | -0.39 | 5.36  | 22.00 | 2.73E-06 | 0.000438 |  |
| ENSMUSG00000045589.7   | <i>Frrs1l</i>        | -0.63 | 4.64  | 21.97 | 2.78E-06 | 0.000443 |  |
| ENSMUSG00000002688.8   | <i>Prkd1</i>         | -0.43 | 7.76  | 21.95 | 2.79E-06 | 0.000443 |  |
| ENSMUSG00000034593.16  | <i>Myo5a</i>         | -0.30 | 8.10  | 21.95 | 2.79E-06 | 0.000443 |  |
| ENSMUSG00000024500.18  | <i>Ppp2r2b</i>       | -0.42 | 9.73  | 21.92 | 2.84E-06 | 0.000449 |  |
| ENSMUSG00000033904.16  | <i>Ccp110</i>        | -0.40 | 6.33  | 21.85 | 2.95E-06 | 0.000465 |  |
| ENSMUSG00000024981.5   | <i>Acsf5</i>         | -0.88 | 2.47  | 21.81 | 3.01E-06 | 0.000474 |  |
| ENSMUSG00000028207.18  | <i>Asph</i>          | -0.39 | 5.77  | 21.80 | 3.03E-06 | 0.000475 |  |
| ENSMUSG00000004633.17  | <i>Chn2</i>          | -0.38 | 7.95  | 21.66 | 3.26E-06 | 0.000510 |  |
| ENSMUSG000000031201.17 | <i>Brcc3</i>         | -0.44 | 5.30  | 21.63 | 3.30E-06 | 0.000514 |  |
| ENSMUSG00000006273.14  | <i>Atp6v1b2</i>      | -0.44 | 5.44  | 21.63 | 3.31E-06 | 0.000514 |  |
| ENSMUSG00000032009.8   | <i>Sesn3</i>         | -0.39 | 5.99  | 21.48 | 3.57E-06 | 0.000553 |  |
| ENSMUSG00000021196.14  | <i>Pfkfb</i>         | -0.69 | 4.09  | 21.47 | 3.59E-06 | 0.000553 |  |
| ENSMUSG00000048756.11  | <i>Foxo3</i>         | -0.38 | 5.85  | 21.30 | 3.93E-06 | 0.000596 |  |
| ENSMUSG000000056899.10 | <i>Immp2l</i>        | -0.36 | 6.73  | 21.30 | 3.93E-06 | 0.000596 |  |
| ENSMUSG00000015222.17  | <i>Map2</i>          | -0.39 | 10.01 | 21.30 | 3.94E-06 | 0.000596 |  |
| ENSMUSG00000022332.7   | <i>Khdrbs3</i>       | -0.37 | 7.31  | 21.31 | 3.91E-06 | 0.000596 |  |
| ENSMUSG00000028370.7   | <i>Pappa</i>         | -0.96 | 3.43  | 21.31 | 3.91E-06 | 0.000596 |  |
| ENSMUSG00000021973.8   | <i>Micu2</i>         | -0.52 | 5.66  | 21.21 | 4.13E-06 | 0.000621 |  |
| ENSMUSG00000020590.16  | <i>Snx13</i>         | -0.38 | 6.06  | 21.08 | 4.40E-06 | 0.000658 |  |
| ENSMUSG00000032560.14  | <i>Dnajc13</i>       | -0.30 | 6.92  | 21.08 | 4.41E-06 | 0.000658 |  |
| ENSMUSG00000040596.15  | <i>Pogk</i>          | -0.33 | 6.57  | 20.98 | 4.64E-06 | 0.000690 |  |
| ENSMUSG00000071644.10  | <i>Eef1g</i>         | -0.40 | 5.83  | 20.91 | 4.80E-06 | 0.000710 |  |
| ENSMUSG000000052726.15 | <i>Kcnt2</i>         | -0.36 | 6.25  | 20.87 | 4.90E-06 | 0.000723 |  |
| ENSMUSG00000075334.2   | <i>Rprm</i>          | -0.54 | 4.68  | 20.85 | 4.96E-06 | 0.000730 |  |
| ENSMUSG00000021782.14  | <i>Dlg5</i>          | -0.35 | 6.60  | 20.80 | 5.09E-06 | 0.000747 |  |
| ENSMUSG000000053819.16 | <i>Camk2d</i>        | -0.44 | 5.55  | 20.80 | 5.11E-06 | 0.000747 |  |
| ENSMUSG000000059482.15 | <i>2610301B20Rik</i> | -0.53 | 4.15  | 20.70 | 5.37E-06 | 0.000783 |  |
| ENSMUSG000000041836.10 | <i>Ptpre</i>         | -0.85 | 3.05  | 20.69 | 5.39E-06 | 0.000783 |  |
| ENSMUSG00000046844.6   | <i>Vat1l</i>         | -0.51 | 4.22  | 20.66 | 5.47E-06 | 0.000793 |  |
| ENSMUSG000000050812.18 | <i>Al314180</i>      | -0.34 | 7.11  | 20.61 | 5.64E-06 | 0.000814 |  |
| ENSMUSG00000001415.10  | <i>Smg5</i>          | -0.44 | 5.51  | 20.59 | 5.68E-06 | 0.000817 |  |
| ENSMUSG00000038349.10  | <i>Plcl1</i>         | -0.39 | 8.40  | 20.59 | 5.70E-06 | 0.000817 |  |
| ENSMUSG000000024109.18 | <i>Nrxn1</i>         | -0.50 | 9.10  | 20.57 | 5.74E-06 | 0.000818 |  |
| ENSMUSG00000100552.1   | <i>NA</i>            | -1.92 | 0.89  | 20.50 | 5.97E-06 | 0.000846 |  |
| ENSMUSG00000034341.17  | <i>Wbp2</i>          | -0.63 | 3.58  | 20.47 | 6.07E-06 | 0.000859 |  |
| ENSMUSG00000021221.15  | <i>Dpf3</i>          | -0.81 | 4.77  | 20.40 | 6.27E-06 | 0.000885 |  |
| ENSMUSG000000039396.11 | <i>Neil3</i>         | -0.34 | 6.30  | 20.37 | 6.37E-06 | 0.000896 |  |
| ENSMUSG00000017009.3   | <i>Sdc4</i>          | -1.20 | 1.78  | 20.37 | 6.38E-06 | 0.000896 |  |
| ENSMUSG00000025189.8   | <i>Cnnm1</i>         | -0.82 | 3.14  | 20.35 | 6.44E-06 | 0.000899 |  |
| ENSMUSG00000033149.16  | <i>Phldb2</i>        | -0.42 | 5.65  | 20.35 | 6.46E-06 | 0.000899 |  |
| ENSMUSG00000042581.14  | <i>Thsd7b</i>        | -0.42 | 6.28  | 20.33 | 6.51E-06 | 0.000904 |  |
| ENSMUSG000000074024.5  | <i>4632427E13Rik</i> | -0.40 | 5.22  | 20.33 | 6.53E-06 | 0.000904 |  |
| ENSMUSG00000028085.12  | <i>Gatb</i>          | -0.60 | 4.29  | 20.25 | 6.78E-06 | 0.000936 |  |
| ENSMUSG00000020086.6   | <i>H2afy2</i>        | -0.38 | 6.69  | 20.23 | 6.87E-06 | 0.000946 |  |
| ENSMUSG00000025241.16  | <i>Fyco1</i>         | -0.44 | 4.54  | 20.22 | 6.90E-06 | 0.000948 |  |
| ENSMUSG00000026469.14  | <i>Xpr1</i>          | -0.52 | 7.64  | 20.14 | 7.19E-06 | 0.000975 |  |
| ENSMUSG000000035354.9  | <i>Uvrag</i>         | -0.34 | 6.13  | 20.15 | 7.15E-06 | 0.000975 |  |
| ENSMUSG000000051065.8  | <i>Mb21d2</i>        | -0.52 | 4.63  | 20.14 | 7.19E-06 | 0.000975 |  |
| ENSMUSG00000061578.8   | <i>Ksr2</i>          | -0.54 | 5.34  | 20.13 | 7.22E-06 | 0.000976 |  |

P-value calculated with likelihood ratio tests. Adjusted P-value for multiple testing calculated using the Benjamini-Hochberg method (FDR).



Supplementary Table 5. Significantly downregulated genes in cKO-E not reversed by *Trp53* co-deletion

| Ensembl Mouse Gene ID   | Gene symbol          | logFC | logCPM | LR     | PValue   | FDR      | YY1 peak |
|-------------------------|----------------------|-------|--------|--------|----------|----------|----------|
| ENSMUSG00000040481.17   | <i>Bptf</i>          | -0.33 | 7.94   | 24.82  | 6.29E-07 | 1.30E-04 |          |
| ENSMUSG00000041879.13   | <i>Ipo9</i>          | -0.40 | 7.28   | 32.06  | 1.50E-08 | 4.74E-06 |          |
| ENSMUSG000000021745.13  | <i>Ptprg</i>         | -0.39 | 9.27   | 38.22  | 6.32E-10 | 2.73E-07 |          |
| ENSMUSG000000074505.5   | <i>Fat3</i>          | -0.37 | 9.68   | 29.16  | 6.68E-08 | 1.78E-05 |          |
| ENSMUSG000000022186.14  | <i>Oxct1</i>         | -0.34 | 6.65   | 24.74  | 6.57E-07 | 1.35E-04 |          |
| ENSMUSG000000060938.14  | <i>Rpl26</i>         | -0.57 | 5.44   | 29.58  | 5.36E-08 | 1.47E-05 |          |
| ENSMUSG000000035623.14  | <i>Rsf1</i>          | -0.32 | 7.51   | 22.07  | 2.62E-06 | 4.34E-04 |          |
| ENSMUSG000000045962.16  | <i>Wnk1</i>          | -0.35 | 8.05   | 25.31  | 4.89E-07 | 1.06E-04 |          |
| ENSMUSG000000037286.15  | <i>Stag1</i>         | -0.33 | 8.46   | 23.87  | 1.03E-06 | 2.01E-04 |          |
| ENSMUSG000000050310.8   | <i>Rictor</i>        | -0.36 | 6.83   | 24.33  | 8.11E-07 | 1.63E-04 |          |
| ENSMUSG000000034252.14  | <i>Senp6</i>         | -0.40 | 7.54   | 29.62  | 5.27E-08 | 1.45E-05 |          |
| ENSMUSG000000019907.10  | <i>Ppp1r12a</i>      | -0.49 | 7.41   | 40.24  | 2.25E-10 | 1.10E-07 |          |
| ENSMUSG000000049119.14  | <i>Fam110b</i>       | -0.37 | 6.94   | 24.66  | 6.85E-07 | 1.40E-04 |          |
| ENSMUSG000000085438.1   | <i>1700020114Rik</i> | -0.49 | 6.85   | 39.71  | 2.95E-10 | 1.39E-07 |          |
| ENSMUSG000000021782.14  | <i>Dlg5</i>          | -0.35 | 6.60   | 20.80  | 5.09E-06 | 7.47E-04 |          |
| ENSMUSG000000055024.12  | <i>Ep300</i>         | -0.34 | 7.20   | 25.35  | 4.78E-07 | 1.04E-04 |          |
| ENSMUSG000000063810.7   | <i>Alms1</i>         | -0.40 | 6.92   | 22.95  | 1.67E-06 | 2.96E-04 |          |
| ENSMUSG000000024853.9   | <i>Sf3b2</i>         | -0.40 | 7.42   | 24.15  | 8.91E-07 | 1.77E-04 |          |
| ENSMUSG000000058571.10  | <i>Gpc6</i>          | -0.47 | 10.42  | 28.26  | 1.06E-07 | 2.71E-05 |          |
| ENSMUSG000000056899.10  | <i>Immp2l</i>        | -0.36 | 6.73   | 21.30  | 3.93E-06 | 5.96E-04 |          |
| ENSMUSG000000025609.15  | <i>Mkn1</i>          | -0.36 | 7.15   | 31.46  | 2.04E-08 | 6.12E-06 |          |
| ENSMUSG000000029128.12  | <i>Rab28</i>         | -0.42 | 6.34   | 22.35  | 2.27E-06 | 3.88E-04 |          |
| ENSMUSG000000047539.9   | <i>Fbxo28</i>        | -0.54 | 5.56   | 42.56  | 6.86E-11 | 3.91E-08 |          |
| ENSMUSG000000039753.16  | <i>Fbxl5</i>         | -0.42 | 6.24   | 31.86  | 1.66E-08 | 5.13E-06 |          |
| ENSMUSG000000030846.15  | <i>Tial1</i>         | -0.39 | 6.38   | 28.29  | 1.04E-07 | 2.68E-05 |          |
| ENSMUSG000000030465.19  | <i>Psd3</i>          | -0.41 | 7.86   | 26.37  | 2.82E-07 | 6.47E-05 |          |
| ENSMUSG000000019792.8   | <i>Trmt11</i>        | -0.45 | 5.66   | 30.36  | 3.59E-08 | 1.04E-05 |          |
| ENSMUSG000000040044.11  | <i>Orc3</i>          | -0.71 | 5.36   | 44.34  | 2.76E-11 | 1.66E-08 |          |
| ENSMUSG000000021039.9   | <i>Snw1</i>          | -0.61 | 5.31   | 43.17  | 5.02E-11 | 2.93E-08 |          |
| ENSMUSG000000028863.13  | <i>Meaf6</i>         | -0.52 | 5.27   | 24.39  | 7.86E-07 | 1.58E-04 |          |
| ENSMUSG000000051177.16  | <i>Plcb1</i>         | -0.41 | 9.70   | 22.01  | 2.71E-06 | 4.38E-04 |          |
| ENSMUSG000000038602.7   | <i>Slc35f1</i>       | -0.34 | 9.66   | 25.44  | 4.56E-07 | 1.01E-04 |          |
| ENSMUSG000000068040.10  | <i>Tm9sf4</i>        | -0.39 | 5.33   | 23.49  | 1.25E-06 | 2.36E-04 |          |
| ENSMUSG000000069135.11  | <i>Fgfr1op</i>       | -0.45 | 4.97   | 23.63  | 1.17E-06 | 2.23E-04 |          |
| ENSMUSG000000037957.14  | <i>Wdr20</i>         | -0.53 | 6.21   | 54.03  | 1.98E-13 | 1.77E-10 |          |
| ENSMUSG000000033732.10  | <i>Sf3b3</i>         | -0.46 | 6.83   | 36.89  | 1.25E-09 | 5.03E-07 |          |
| ENSMUSG000000021431.14  | <i>Snrnp48</i>       | -0.45 | 4.72   | 23.41  | 1.31E-06 | 2.43E-04 |          |
| ENSMUSG000000059208.14  | <i>Hnrmpm</i>        | -0.51 | 7.95   | 58.31  | 2.24E-14 | 2.28E-11 |          |
| ENSMUSG000000055296.14  | <i>Tmem245</i>       | -0.46 | 6.60   | 35.46  | 2.60E-09 | 9.65E-07 |          |
| ENSMUSG000000048661.14  | <i>Lemd3</i>         | -0.42 | 6.31   | 31.80  | 1.71E-08 | 5.24E-06 |          |
| ENSMUSG000000028514.15  | <i>Usp24</i>         | -0.62 | 7.02   | 70.65  | 4.26E-17 | 6.50E-14 |          |
| ENSMUSG00000001415.10   | <i>Smg5</i>          | -0.44 | 5.51   | 20.59  | 5.68E-06 | 8.17E-04 |          |
| ENSMUSG000000027253.15  | <i>Lrp4</i>          | -0.45 | 6.51   | 22.14  | 2.54E-06 | 4.25E-04 |          |
| ENSMUSG000000005882.18  | <i>Uqcc1</i>         | -0.61 | 5.41   | 49.89  | 1.62E-12 | 1.28E-09 |          |
| ENSMUSG000000004233.14  | <i>Wars2</i>         | -0.71 | 4.52   | 41.36  | 1.27E-10 | 6.64E-08 |          |
| ENSMUSG000000025241.16  | <i>Fyco1</i>         | -0.44 | 4.54   | 20.22  | 6.90E-06 | 9.48E-04 |          |
| ENSMUSG000000049421.13  | <i>Zfp260</i>        | -0.73 | 5.32   | 64.88  | 7.97E-16 | 1.01E-12 |          |
| ENSMUSG000000025103.8   | <i>Btbd1</i>         | -0.59 | 5.88   | 55.10  | 1.15E-13 | 1.06E-10 |          |
| ENSMUSG000000057841.5   | <i>Rpl32</i>         | -0.58 | 6.37   | 24.57  | 7.17E-07 | 1.45E-04 |          |
| ENSMUSG000000052812.5   | <i>Atad2b</i>        | -0.46 | 7.39   | 36.95  | 1.21E-09 | 4.91E-07 |          |
| ENSMUSG000000047454.12  | <i>Gphn</i>          | -0.67 | 7.46   | 72.68  | 1.53E-17 | 2.64E-14 |          |
| ENSMUSG000000036377.18  | <i>C530008M17Rik</i> | -0.68 | 8.70   | 104.13 | 1.89E-24 | 5.91E-21 |          |
| ENSMUSG0000000032050.17 | <i>Rdx</i>           | -0.44 | 7.41   | 35.43  | 2.65E-09 | 9.74E-07 |          |
| ENSMUSG000000015189.12  | <i>Casd1</i>         | -0.51 | 5.37   | 41.72  | 1.05E-10 | 5.71E-08 |          |
| ENSMUSG000000031684.11  | <i>Slc10a7</i>       | -0.53 | 6.73   | 46.18  | 1.08E-11 | 7.16E-09 |          |
| ENSMUSG000000021938.11  | <i>Pspc1</i>         | -0.46 | 7.33   | 44.89  | 2.09E-11 | 1.34E-08 |          |
| ENSMUSG000000019889.10  | <i>Ptprk</i>         | -0.38 | 8.01   | 27.81  | 1.34E-07 | 3.37E-05 |          |
| ENSMUSG000000039968.9   | <i>Rsb1l</i>         | -0.43 | 5.93   | 31.02  | 2.55E-08 | 7.53E-06 |          |
| ENSMUSG000000019951.10  | <i>Uhrf1bp1l</i>     | -0.50 | 6.23   | 46.82  | 7.80E-12 | 5.33E-09 |          |
| ENSMUSG000000034573.14  | <i>Ptpn13</i>        | -0.59 | 5.54   | 39.09  | 4.04E-10 | 1.79E-07 |          |
| ENSMUSG000000020463.15  | <i>Ppp4r3b</i>       | -0.53 | 6.61   | 49.15  | 2.37E-12 | 1.76E-09 |          |
| ENSMUSG000000019837.8   | <i>Gtf3c6</i>        | -0.65 | 4.32   | 26.38  | 2.80E-07 | 6.46E-05 |          |
| ENSMUSG000000031333.7   | <i>Abcb7</i>         | -0.67 | 6.08   | 83.80  | 5.47E-20 | 1.14E-16 |          |
| ENSMUSG000000029104.15  | <i>Htt</i>           | -0.59 | 6.91   | 75.40  | 3.84E-18 | 7.67E-15 |          |
| ENSMUSG000000028080.16  | <i>Lrba</i>          | -0.76 | 6.00   | 103.11 | 3.17E-24 | 9.14E-21 |          |

|                       |                      |       |      |        |          |          |  |
|-----------------------|----------------------|-------|------|--------|----------|----------|--|
| ENSMUSG00000039089.15 | <i>L3mbtl3</i>       | -0.44 | 6.04 | 29.01  | 7.20E-08 | 1.91E-05 |  |
| ENSMUSG00000021375.9  | <i>Kif13a</i>        | -0.65 | 6.00 | 54.41  | 1.63E-13 | 1.48E-10 |  |
| ENSMUSG00000031290.14 | <i>Lrch2</i>         | -0.78 | 6.43 | 73.89  | 8.24E-18 | 1.58E-14 |  |
| ENSMUSG00000033502.14 | <i>Cdc14a</i>        | -0.45 | 7.02 | 27.31  | 1.73E-07 | 4.18E-05 |  |
| ENSMUSG00000058325.6  | <i>Dock1</i>         | -0.49 | 7.38 | 34.33  | 4.66E-09 | 1.62E-06 |  |
| ENSMUSG00000029432.12 | <i>Nipsnap2</i>      | -0.65 | 4.59 | 41.52  | 1.17E-10 | 6.19E-08 |  |
| ENSMUSG00000035798.14 | <i>Zdhhc17</i>       | -0.84 | 6.15 | 123.06 | 1.35E-28 | 5.85E-25 |  |
| ENSMUSG00000014426.8  | <i>Map3k4</i>        | -0.58 | 6.10 | 67.15  | 2.51E-16 | 3.52E-13 |  |
| ENSMUSG00000062328.7  | <i>Rpl17</i>         | -0.65 | 5.62 | 36.68  | 1.39E-09 | 5.52E-07 |  |
| ENSMUSG00000029179.14 | <i>Zcchc4</i>        | -0.67 | 4.72 | 39.28  | 3.68E-10 | 1.67E-07 |  |
| ENSMUSG00000060862.10 | <i>Zbtb40</i>        | -0.65 | 4.92 | 36.60  | 1.45E-09 | 5.70E-07 |  |
| ENSMUSG00000041220.10 | <i>Elovl6</i>        | -0.47 | 7.32 | 29.84  | 4.70E-08 | 1.30E-05 |  |
| ENSMUSG00000001127.12 | <i>Araf</i>          | -0.84 | 6.11 | 114.57 | 9.76E-27 | 3.38E-23 |  |
| ENSMUSG00000038070.15 | <i>Cntln</i>         | -0.55 | 6.43 | 44.52  | 2.52E-11 | 1.54E-08 |  |
| ENSMUSG00000035934.16 | <i>Pknox2</i>        | -0.56 | 6.49 | 45.17  | 1.80E-11 | 1.18E-08 |  |
| ENSMUSG00000006678.6  | <i>Pola1</i>         | -0.55 | 7.53 | 40.94  | 1.57E-10 | 8.00E-08 |  |
| ENSMUSG00000027332.11 | <i>Ivd</i>           | -0.62 | 4.32 | 27.38  | 1.67E-07 | 4.08E-05 |  |
| ENSMUSG00000021981.9  | <i>Cab39l</i>        | -0.68 | 4.43 | 36.52  | 1.51E-09 | 5.84E-07 |  |
| ENSMUSG00000026275.13 | <i>Ppp1r7</i>        | -0.64 | 5.16 | 38.13  | 6.63E-10 | 2.83E-07 |  |
| ENSMUSG00000021577.14 | <i>Sdha</i>          | -0.85 | 5.42 | 91.68  | 1.02E-21 | 2.64E-18 |  |
| ENSMUSG00000018501.17 | <i>Ncor1</i>         | -0.77 | 8.31 | 118.53 | 1.33E-27 | 5.29E-24 |  |
| ENSMUSG00000075334.2  | <i>Rprm</i>          | -0.54 | 4.68 | 20.85  | 4.96E-06 | 7.30E-04 |  |
| ENSMUSG00000020564.17 | <i>Atxn7l1</i>       | -0.52 | 7.49 | 53.07  | 3.22E-13 | 2.78E-10 |  |
| ENSMUSG00000028437.14 | <i>Ubap1</i>         | -0.58 | 5.84 | 53.85  | 2.17E-13 | 1.91E-10 |  |
| ENSMUSG00000021027.16 | <i>Ralgapa1</i>      | -0.88 | 7.28 | 114.68 | 9.24E-27 | 3.38E-23 |  |
| ENSMUSG00000034285.15 | <i>Nipsnap1</i>      | -0.71 | 4.76 | 49.95  | 1.58E-12 | 1.26E-09 |  |
| ENSMUSG00000021669.15 | <i>Col4a3bp</i>      | -0.70 | 5.80 | 69.57  | 7.38E-17 | 1.09E-13 |  |
| ENSMUSG00000022636.13 | <i>Alcam</i>         | -0.69 | 8.67 | 64.10  | 1.18E-15 | 1.43E-12 |  |
| ENSMUSG00000039967.14 | <i>Zfp292</i>        | -0.68 | 8.26 | 99.18  | 2.31E-23 | 6.30E-20 |  |
| ENSMUSG00000071064.13 | <i>Zfp827</i>        | -0.71 | 7.45 | 71.61  | 2.63E-17 | 4.13E-14 |  |
| ENSMUSG00000034402.3  | <i>Kcnh5</i>         | -0.85 | 6.00 | 60.89  | 6.05E-15 | 6.82E-12 |  |
| ENSMUSG00000035227.7  | <i>Spcs2</i>         | -0.82 | 4.77 | 71.70  | 2.50E-17 | 4.06E-14 |  |
| ENSMUSG00000025810.9  | <i>Nrp1</i>          | -0.61 | 7.40 | 43.39  | 4.48E-11 | 2.64E-08 |  |
| ENSMUSG00000063446.4  | <i>Plppr1</i>        | -0.64 | 8.49 | 67.00  | 2.71E-16 | 3.71E-13 |  |
| ENSMUSG00000041921.16 | <i>Metap1d</i>       | -0.74 | 4.82 | 65.18  | 6.83E-16 | 8.86E-13 |  |
| ENSMUSG00000029782.19 | <i>Tmem209</i>       | -0.70 | 4.50 | 41.71  | 1.06E-10 | 5.71E-08 |  |
| ENSMUSG00000032498.9  | <i>Mlh1</i>          | -0.70 | 4.73 | 49.30  | 2.20E-12 | 1.68E-09 |  |
| ENSMUSG00000032263.14 | <i>Bckdhb</i>        | -0.61 | 5.55 | 41.67  | 1.08E-10 | 5.80E-08 |  |
| ENSMUSG00000063888.6  | <i>Rpl7l1</i>        | -0.88 | 4.72 | 72.88  | 1.38E-17 | 2.47E-14 |  |
| ENSMUSG00000079056.12 | <i>Kcni3</i>         | -0.59 | 5.13 | 23.05  | 1.58E-06 | 2.85E-04 |  |
| ENSMUSG00000027650.12 | <i>Tti1</i>          | -0.73 | 4.49 | 40.95  | 1.56E-10 | 8.00E-08 |  |
| ENSMUSG00000035967.15 | <i>Ints6l</i>        | -0.73 | 5.22 | 64.28  | 1.08E-15 | 1.34E-12 |  |
| ENSMUSG00000036371.6  | <i>Serbp1</i>        | -0.98 | 7.25 | 139.95 | 2.73E-32 | 1.57E-28 |  |
| ENSMUSG0000002870.8   | <i>Mcm2</i>          | -0.73 | 6.14 | 34.74  | 3.78E-09 | 1.35E-06 |  |
| ENSMUSG00000034341.17 | <i>Wbp2</i>          | -0.63 | 3.58 | 20.47  | 6.07E-06 | 8.59E-04 |  |
| ENSMUSG00000027428.9  | <i>Rbbp9</i>         | -0.97 | 3.46 | 39.51  | 3.27E-10 | 1.52E-07 |  |
| ENSMUSG0000003360.14  | <i>Ddx23</i>         | -0.99 | 4.72 | 88.91  | 4.13E-21 | 1.02E-17 |  |
| ENSMUSG00000056014.15 | <i>A430033K04Rik</i> | -0.67 | 4.47 | 39.65  | 3.03E-10 | 1.42E-07 |  |
| ENSMUSG00000052613.16 | <i>Pcdh15</i>        | -0.69 | 6.19 | 42.34  | 7.68E-11 | 4.29E-08 |  |
| ENSMUSG00000074129.13 | <i>Rpl13a</i>        | -1.10 | 2.66 | 30.13  | 4.03E-08 | 1.14E-05 |  |
| ENSMUSG00000064105.12 | <i>Cnnm2</i>         | -1.19 | 3.89 | 49.48  | 2.00E-12 | 1.55E-09 |  |
| ENSMUSG00000039470.15 | <i>Zdhhc2</i>        | -0.96 | 4.42 | 59.94  | 9.80E-15 | 1.08E-11 |  |
| ENSMUSG00000032040.15 | <i>Dcps</i>          | -0.73 | 3.90 | 39.42  | 3.42E-10 | 1.57E-07 |  |
| ENSMUSG00000026495.8  | <i>Efcab2</i>        | -1.05 | 2.86 | 27.51  | 1.56E-07 | 3.82E-05 |  |
| ENSMUSG00000040943.12 | <i>Tet2</i>          | -1.13 | 6.74 | 207.77 | 4.21E-47 | 1.09E-42 |  |
| ENSMUSG00000032220.10 | <i>Myo1e</i>         | -0.71 | 4.57 | 52.12  | 5.22E-13 | 4.44E-10 |  |
| ENSMUSG00000035704.17 | <i>Alg8</i>          | -1.08 | 4.04 | 83.98  | 4.99E-20 | 1.08E-16 |  |
| ENSMUSG00000032238.17 | <i>Rora</i>          | -0.96 | 7.75 | 143.59 | 4.37E-33 | 2.84E-29 |  |
| ENSMUSG00000027204.13 | <i>Fbn1</i>          | -0.76 | 5.27 | 46.86  | 7.62E-12 | 5.27E-09 |  |
| ENSMUSG00000039765.15 | <i>Cc2d2a</i>        | -0.94 | 4.51 | 58.35  | 2.20E-14 | 2.28E-11 |  |
| ENSMUSG00000022672.8  | <i>Prkdc</i>         | -1.21 | 6.05 | 177.75 | 1.50E-40 | 1.56E-36 |  |
| ENSMUSG00000035234.18 | <i>Abraxas1</i>      | -1.05 | 3.43 | 62.08  | 3.31E-15 | 3.81E-12 |  |
| ENSMUSG00000034462.9  | <i>Pkd2</i>          | -1.01 | 5.93 | 180.27 | 4.23E-41 | 5.49E-37 |  |
| ENSMUSG00000030061.16 | <i>Uba3</i>          | -1.25 | 5.54 | 158.33 | 2.62E-36 | 2.27E-32 |  |
| ENSMUSG00000063681.14 | <i>Crb1</i>          | -1.06 | 3.70 | 51.73  | 6.37E-13 | 5.25E-10 |  |
| ENSMUSG00000058729.13 | <i>Lin9</i>          | -0.89 | 5.34 | 87.41  | 8.84E-21 | 1.99E-17 |  |
| ENSMUSG00000031198.4  | <i>Fundc2</i>        | -1.04 | 2.53 | 30.24  | 3.82E-08 | 1.08E-05 |  |
| ENSMUSG00000025154.14 | <i>Arhgap19</i>      | -1.30 | 4.42 | 104.09 | 1.94E-24 | 5.91E-21 |  |

|                      |                |       |      |       |          |          |
|----------------------|----------------|-------|------|-------|----------|----------|
| ENSMUSG0000006403.13 | <i>Adamts4</i> | -1.03 | 2.04 | 22.77 | 1.83E-06 | 3.21E-04 |
|----------------------|----------------|-------|------|-------|----------|----------|

P-value calculated with likelihood ratio tests. Adjusted P-value for multiple testing calculated using the Benjamini-Hochberg method (FDR).

Supplementary Table 6. Mouse strains

| <b>Mouse</b>                                                                                              | <b>ID Number</b> |
|-----------------------------------------------------------------------------------------------------------|------------------|
| B6.129(C3)- <i>Ino80</i> <sup>tm1.1Jland/J</sup><br><i>Ino80</i> <sup>fl</sup>                            | JAX# 027920      |
| B6.129P2- <i>Gt(ROSA)26Sor</i> <sup>tm1(DTA)Lky/J</sup><br><i>ROSA</i> <sup>DTA</sup>                     | JAX# 009669      |
| B6N.129S6- <i>Gt(ROSA)26Sor</i> <sup>tm1(CAG-tdTomato*,-EGFP*)Ees/J</sup><br><i>ROSA</i> <sup>nT-nG</sup> | JAX# 023537      |
| B6.129P2- <i>Trp53</i> <sup>tm1Brn/J</sup><br><i>p53</i> <sup>fl</sup>                                    | JAX# 008462      |
| B6.129S2- <i>Emx1</i> <sup>tm1(cre)Krl/J</sup><br><i>Emx1</i> <sup>lRES-Cre</sup>                         | JAX# 005628      |
| B6.129P2(Cg)- <i>Foxg1</i> <sup>tm1(cre)Skml/J</sup><br><i>Foxg1</i> <sup>Cre</sup>                       | JAX# 006084      |
| <i>Neurod6</i> <sup>tm1(cre)Kan</sup><br><i>Neurod6</i> <sup>Cre</sup>                                    | MGI# 2668659     |
| FVB- <i>Tg(GFAP-cre)25Mes/J</i><br><i>Tg(hGFAP-Cre)</i>                                                   | JAX# 004600      |
| STOCK <i>Brca2</i> <sup>tm1Brn/Nci</sup>                                                                  | NCI# 01XB9       |

Supplementary Table 7. Genotyping primers

| <b>Gene Target</b>        | <b>Oligo Name</b> | <b>Sequence (5' - 3')</b> | <b>PCR product</b>                                        |
|---------------------------|-------------------|---------------------------|-----------------------------------------------------------|
| <i>Cre</i>                | Cre-F             | TCGATGCAACGAGTGATGAG      | 500 bp                                                    |
|                           | Cre-R             | TTCGGCTATACGTAACAGGG      |                                                           |
| <i>Ino80<sup>fl</sup></i> | Ino80-F           | GCACTTCCTGGTTTTGCTGT      | WT = 290 bp<br>floxed = 350 bp                            |
|                           | Ino80-R           | CACTGACTGGCGTGTTTCAGA     |                                                           |
| <i>Ino80<sup>fl</sup></i> | Ino80-P1          | CTGGATGTGAAGGGAGAAGG      | WT = 416 bp<br>floxed = 482 bp<br>deleted allele = 352 bp |
|                           | Ino80-P2          | CATCTCTCCAGCCAGCACACT     |                                                           |
|                           | Ino80-P3          | TGCCACTCTACCTGCATCTG      |                                                           |
| <i>DTA</i>                | DTA-F             | CGACCTGCAGGTCCTCG         | 650 bp                                                    |
|                           | DTA-R             | CTCGAGTTTGTCCAATTATGTCAC  |                                                           |
| <i>Trp53<sup>fl</sup></i> | p53-F             | GGTTAAACCCAGCTTGACCA      | WT = 270 bp<br>floxed = 390 bp                            |
|                           | p53-R             | GGAGGCAGAGACAGTTGGAG      |                                                           |
| <i>Brca2<sup>fl</sup></i> | Brca2-F           | GGCTGTCTTAGAACTTAGGCTG    | WT = 298 bp<br>floxed = 376 bp                            |
|                           | Brca2-R           | CTCCACACATACATCATGTGTC    |                                                           |

Supplementary Table 8. Primary antibodies

| <b>Primary Antibody</b>    | <b>Company and product number</b>        | <b>Dilution</b> | <b>Notes</b>      |
|----------------------------|------------------------------------------|-----------------|-------------------|
| Rabbit anti-INO80          | Qiu et al., 2016, kind gift of J. Landry | WB, 1:1000      |                   |
| Rabbit anti-INO80          | Proteintech 18810-1-AP                   | WB, 1:500       |                   |
| Rabbit anti-INO80          | Abcam ab105451                           | WB, 1:1000      |                   |
| Rabbit anti-GAPDH          | Santa Cruz Biotechnology sc-25778        | WB, 1:1500      |                   |
| Chicken anti-MAP2          | Novus Biologicals NB300-213              | IF, 1:2000      |                   |
| Rabbit anti-GFP            | Thermo Fisher A-11122                    | IF, 1:250       |                   |
| Chicken anti-GFP           | Abcam ab13970                            | IF, 1:2000      |                   |
| Rat anti-BCL11B            | Abcam ab18465                            | IF, 1:500       |                   |
| Mouse anti-TLE4            | Santa Cruz Biotechnology sc-365406       | IF, 1:250       |                   |
| Rat anti-L1-CAM            | EMD Millipore MAB5272                    | IF, 1:500       |                   |
| Rat anti-EOMES             | Thermo Fisher 14-4875-80                 | IF, 1:500       |                   |
| Rabbit anti-SOX2           | Millipore/Chemicon AB5603                | IF, 1:2000      |                   |
| Goat anti-SOX2             | Santa Cruz Biotechnology sc-17320        | IF, 1:250       |                   |
| Rabbit anti-CC3            | Cell Signaling 9661S                     | IF, 1:500       |                   |
| Rabbit anti-CC3-Alexa555   | Cell Signaling 9604S                     | IF, 1:100       | Alexa555-labeled  |
| Rabbit anti-pHH3-Alexa647  | Cell Signaling 3458S                     | IF, 1:400       | Alexa647-labeled  |
| Rabbit anti-TRP53          | Leica P53-CM5P-L                         | IF, 1:500       |                   |
| Rat anti-F4/80             | Abcam ab6640                             | IF, 1:500       |                   |
| Rabbit anti-pKAP1          | Bethyl Laboratories A300-767A            | IF, 1:200       |                   |
| Rat anti-HA                | Sigma-Aldrich 11867423001                | IF, 1:250       |                   |
| Hamster anti-Myc           | Absolute Antibody Ab00100-22.0           | IF, 1:1000      |                   |
| Rabbit anti- $\gamma$ H2AX | Cell Signaling 9718S                     | IF, 1:250       |                   |
| Chicken anti-RBFOX3        | EMD Millipore ABN91                      | IF, 1:2000      |                   |
| Rabbit anti-NEUROG2        | Cell Signaling 13144S                    | IF, 1:250       | antigen retrieval |
| Rabbit anti-SATB2          | Abcam ab92446                            | IF, 1:500       |                   |
| Rabbit anti-LHX2           | EMD Millipore ABE1402                    | IF, 1:2000      |                   |
| Rabbit anti-TP53BP1        | Novus Biologicals NB100-304SS            | IF, 1:1000      |                   |
| Mouse anti- $\gamma$ H2AX  | Millipore Sigma 05-636                   | IF, 1:500       |                   |

Supplementary Table 9. Secondary antibodies

| <b>Secondary Antibody</b>                                  | <b>Company</b>              | <b>Dilution</b> |
|------------------------------------------------------------|-----------------------------|-----------------|
| AlexaFluor 488 AffiniPure<br>Donkey anti-Rabbit IgG (H+L)  | Jackson ImmunoResearch Labs | 1:250           |
| AlexaFluor 488 AffiniPure<br>Donkey anti-Rat IgG (H+L)     | Jackson ImmunoResearch Labs | 1:250           |
| AlexaFluor 488 AffiniPure<br>Donkey anti-Goat IgG (H+L)    | Jackson ImmunoResearch Labs | 1:250           |
| AlexaFluor 594 AffiniPure<br>Donkey anti-Mouse IgG (H+L)   | Jackson ImmunoResearch Labs | 1:250           |
| Cy3 AffiniPure<br>Donkey anti-Rabbit IgG (H+L)             | Jackson ImmunoResearch Labs | 1:250           |
| Cy3 AffiniPure<br>Donkey anti-Rat IgG (H+L)                | Jackson ImmunoResearch Labs | 1:250           |
| AlexaFluor 647 AffiniPure<br>Donkey anti-Goat IgG (H+L)    | Jackson ImmunoResearch Labs | 1:250           |
| AlexaFluor 647 Affinipure<br>Donkey anti-Rabbit IgG (H+L)  | Jackson ImmunoResearch Labs | 1:250           |
| AlexaFluor 647 Affinipure<br>Donkey anti-Rat IgG (H+L)     | Jackson ImmunoResearch Labs | 1:250           |
| AlexaFluor 647 Affinipure<br>Donkey anti-Chicken IgG (H+L) | Jackson ImmunoResearch Labs | 1:250           |

Supplementary Table 10. Primers and probes for ddPCR

| <b>Gene Target</b> | <b>Primer_1 / Primer_2</b> | <b>Probe (5' - 3')</b>                               |
|--------------------|----------------------------|------------------------------------------------------|
| <i>Eda2r</i>       | GCATCTACCTTCACTAAGCTCA     | /56-FAM/TGCATCCCA<br>/Zen/TGTACAAAGCAGACTCC/3IABkFQ/ |
|                    | GTTCTACCGAAAGACACGCAT      |                                                      |
| <i>Pvt1</i>        | GCCACTGCCAATGTCTGT         | /56-FAM/TCCAGGTAG<br>/Zen/CCCGAGAGATGACA/3IABkFQ/    |
|                    | CACTGAAAACAAGGACCGAAAC     |                                                      |
| <i>Ano3</i>        | CGAAGAAAACGTCCCTCCAT       | /56-FAM/AGCTGTCGT<br>/Zen/TGAGTCTCTGCAGTG/3IABkFQ/   |
|                    | GTCTTCATGTGTCCTCTATGTGA    |                                                      |
| <i>Ino80</i>       | CTCTCATACTCTGCACTTCTGTC    | /56-FAM/CTGCGGTGA<br>/ZEN/CTCGTGGACTGG/3IABkFQ/      |
|                    | GCTACCTCCTCACTTCGTTG       |                                                      |
| <i>Srp72</i>       | CTCTCCTCATCATAGTCGTCCT     | /5HEX/CCAAGCACT<br>/Zen/CATCGTAGCGTTCCA/3IABkFQ/     |
|                    | CTGAAGGAGCTTTATGGACAAGT    |                                                      |
